# Supplementary material for: Deep phenotyping of post-infectious myalgic encephalomyelitis/chronic fatigue syndrome
Source: PubMed Central journal article supplement (PMC10881493; doi:10.1038/s41467-024-45107-3), 2024-02-21
Supplement: 41467_2024_45107_MOESM1_ESM.pdf [file 41467_2024_45107_MOESM1_ESM.pdf]

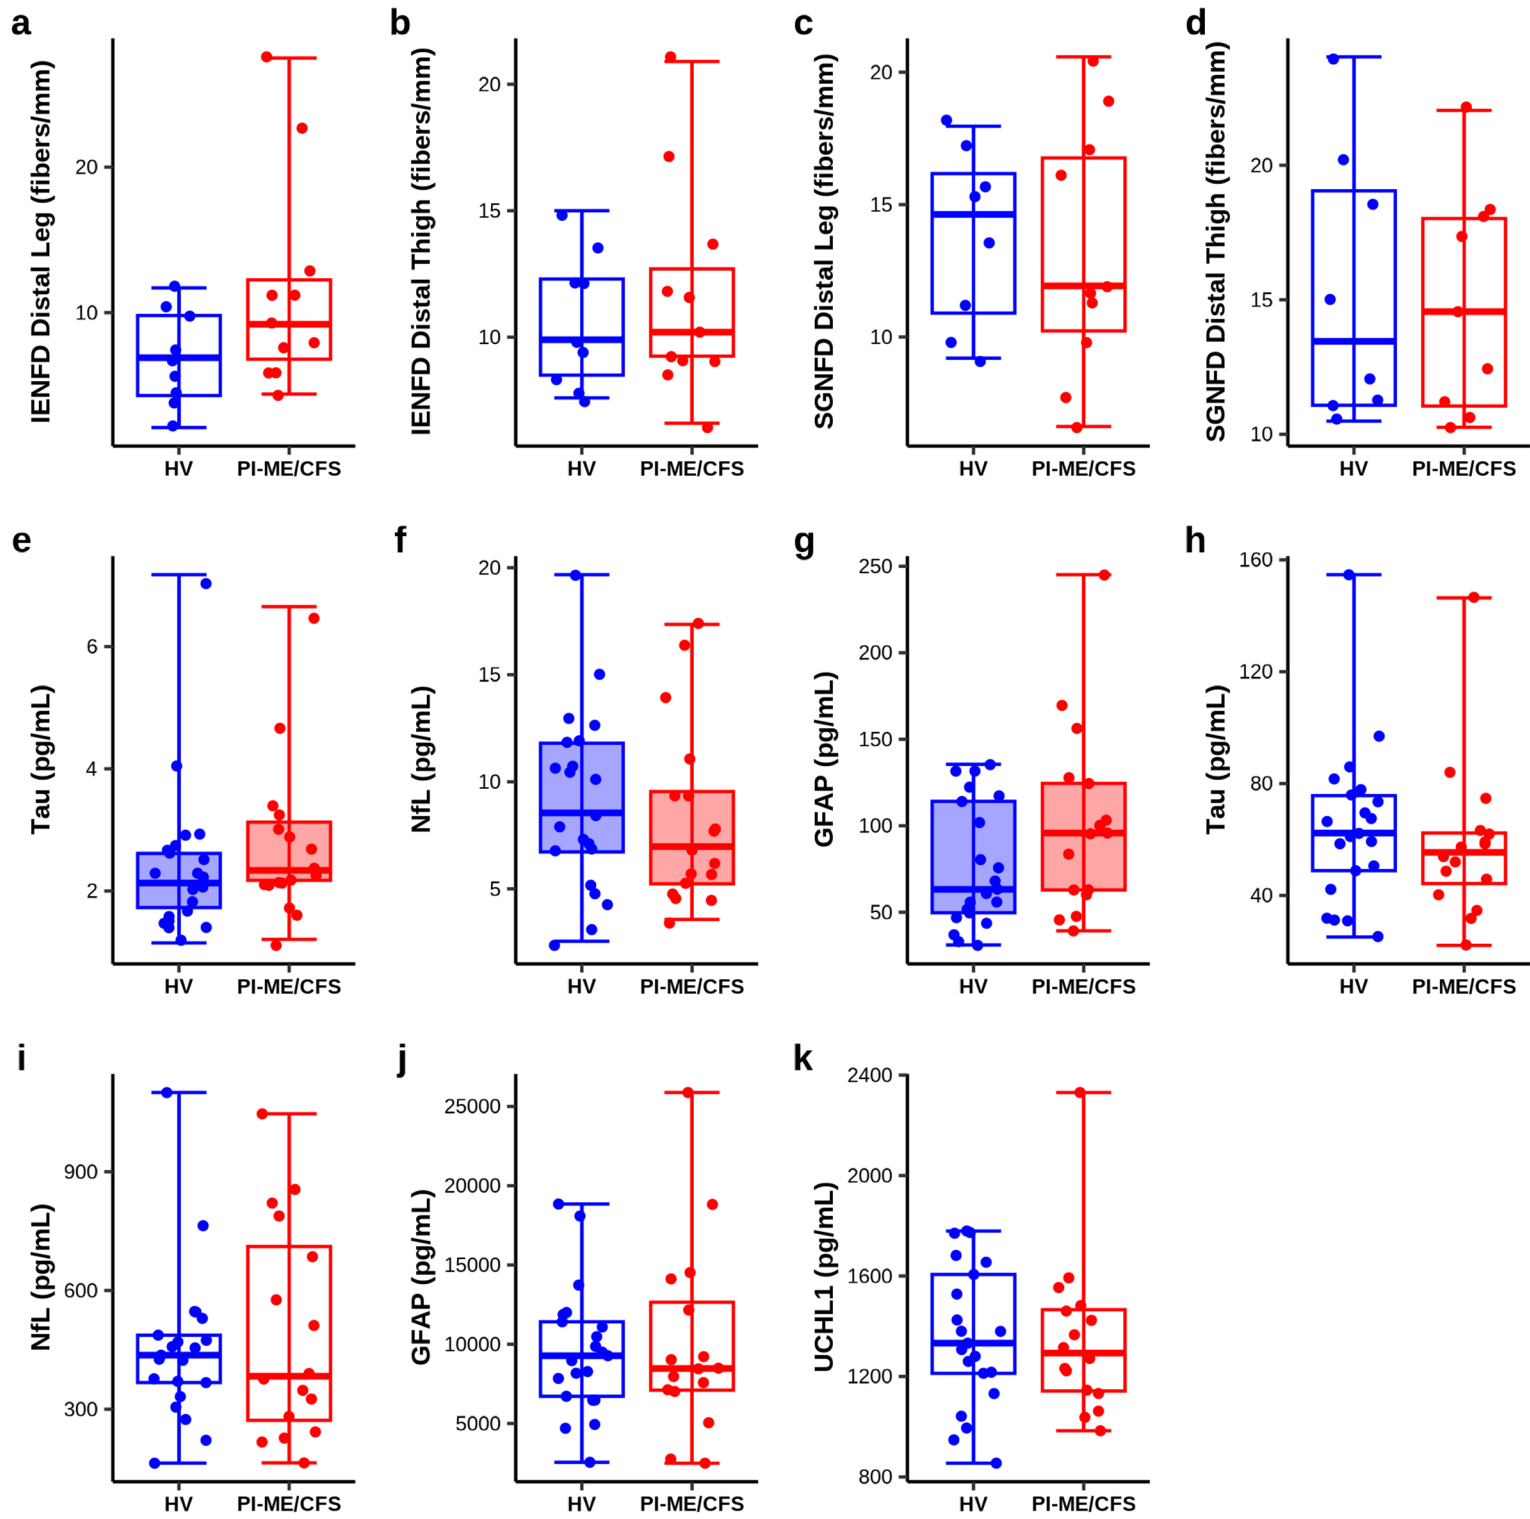

Figure S1: Small nerve fiber density measurements and markers of neuronal injury:  
A-D. Boxplots of the indicated small nerve density measurement on the y axis in HV and PI-ME/CFS groups. A-B in HVs (blue; n = 9 independent participants) and PI-ME/CFS (red; n = 11 independent participants) groups, C-D in HVs (blue; n = 8 independent participants) and PI-ME/CFS (red; n = 10 independent participants) groups. No statistical differences were noted between groups. E-G. Boxplots of the indicated neuronal injury marker measured in plasma samples. No statistical differences were noted between groups of HVs (blue; n = 21 independent participants) and PI-ME/CFS patients (red; n = 17 independent participants). H-K. Boxplots of the indicated neuronal injury marker measured in cerebrospinal fluid samples. No statistical differences were noted between groups of HVs (blue; n = 21 independent participants) and PI-ME/CFS patients (red; n = 16 independent participants). For box plots a-k boxes depict the median (horizontal line) within quartiles 1–3 (bounds of box). Whiskers extend to minimum and maximum values. Abbreviations. IENFD: intraepithelial nerve fiber density, SGNFD: sweat gland nerve fiber density, NfL: neurofilament light chain, GFAP: glial fibrillary acidic protein, UCHL1: ubiquitin carboxyl-terminal esterase L1. Source data are provided as a Source Data file.

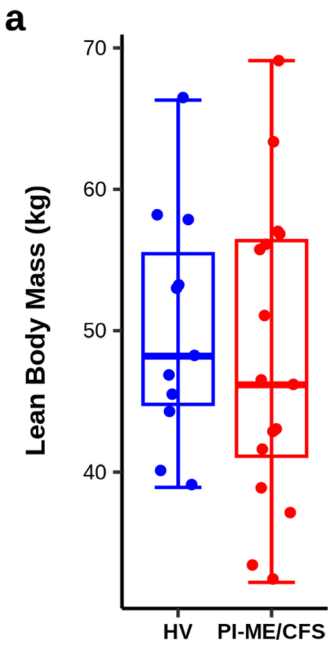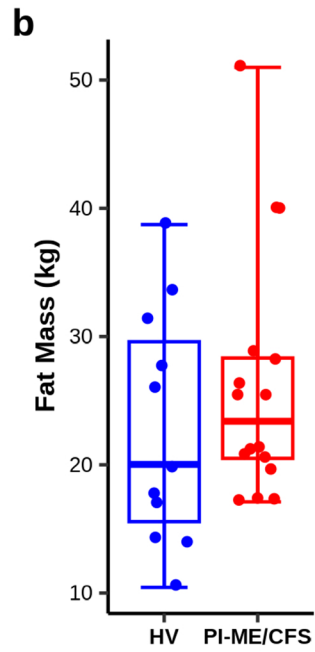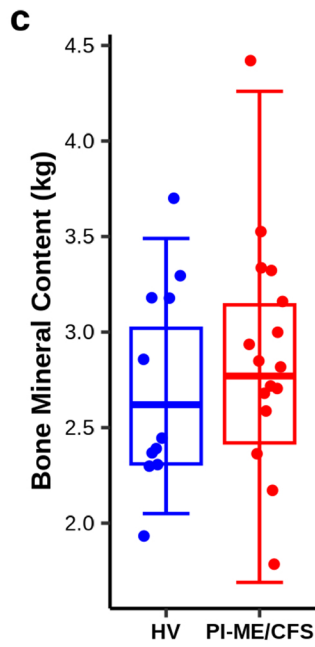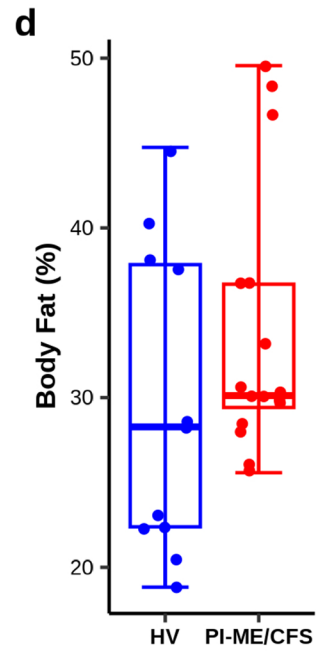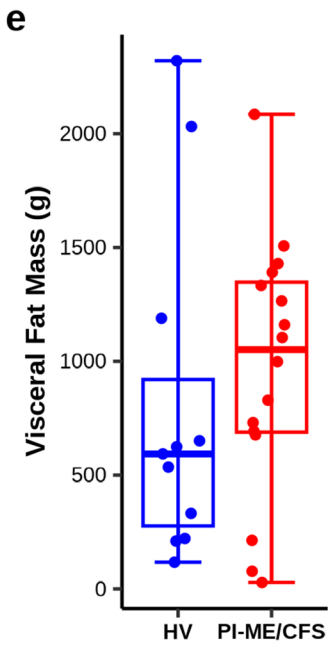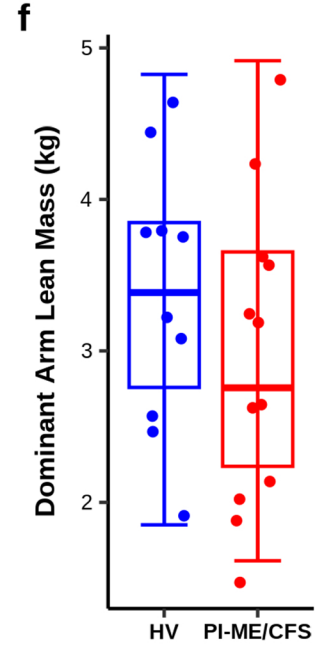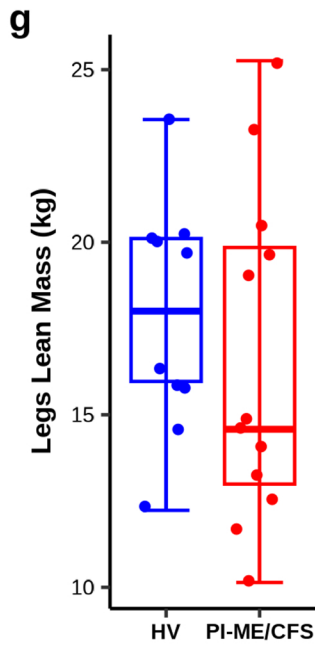

Figure S2: Body mass composition measurements:

A-G. Boxplots of the indicated body mass composition measurements on the y axis in HV and PI-ME/CFS groups. No statistical differences were noted between groups of A-E) HVs (blue; n = 11 independent participants) and PI-ME/CFS patients (red; n = 16 independent participants) and F-G) HVs (blue; n = 10 independent participants) and PI-ME/CFS (red; n = 12 independent participants) groups. For box plots a-g boxes depict the median (horizontal line) within quartiles 1–3 (bounds of box). Whiskers extend to minimum and maximum values. Source data are provided as a Source Data file.

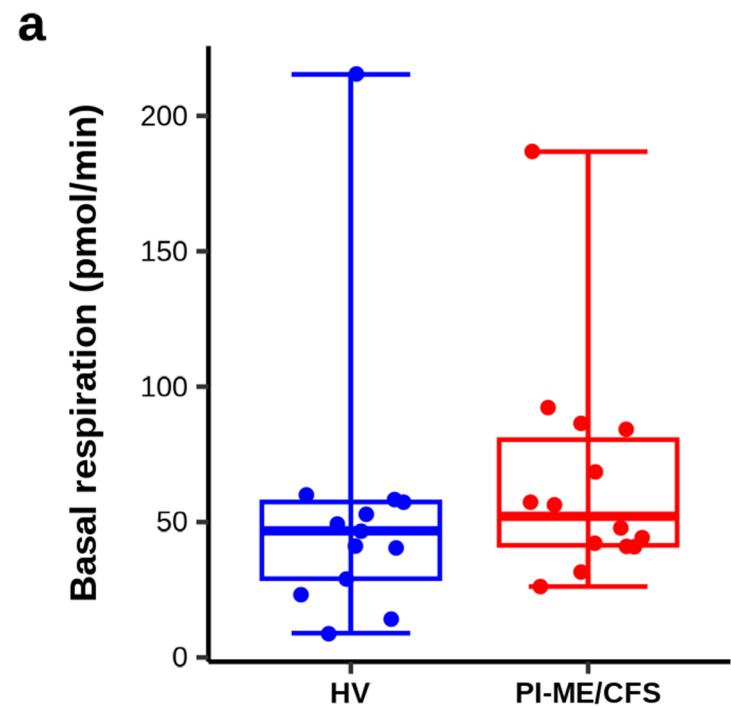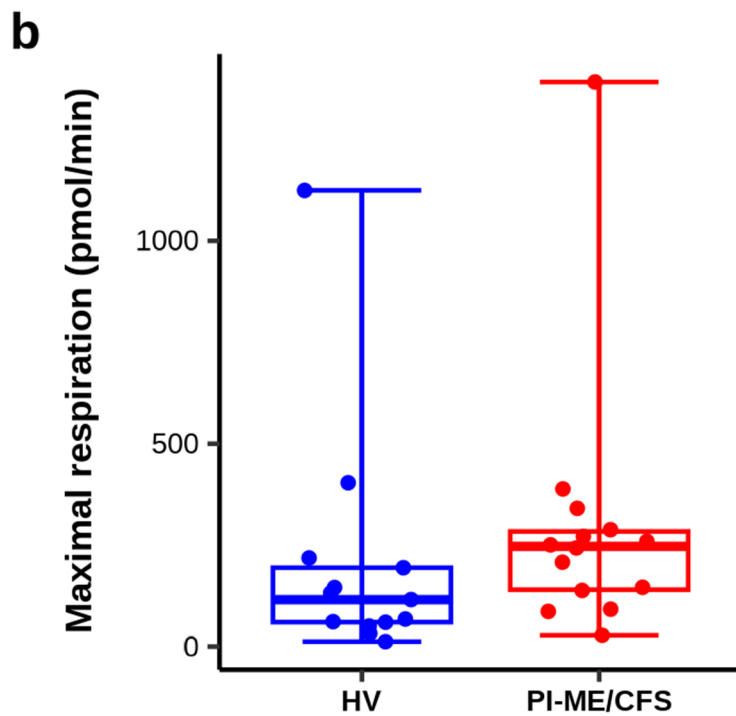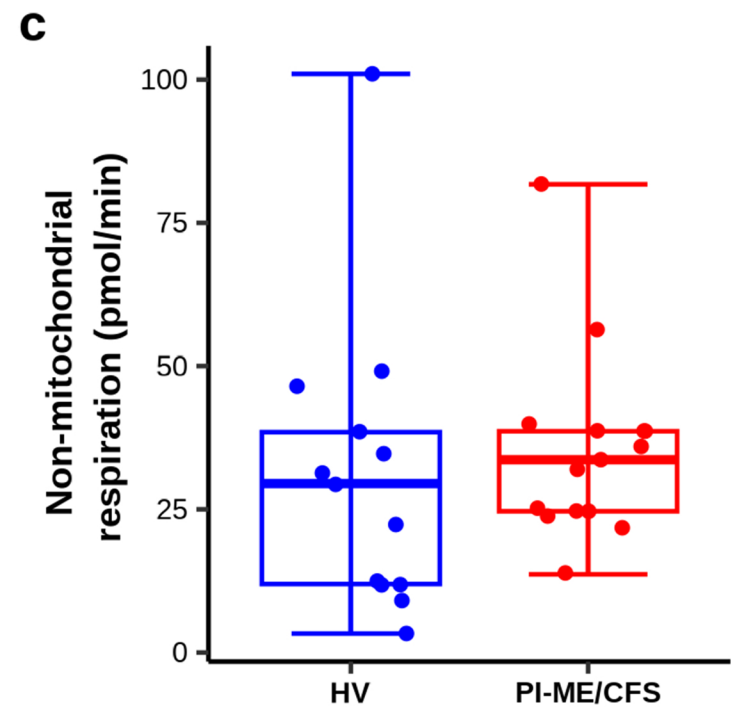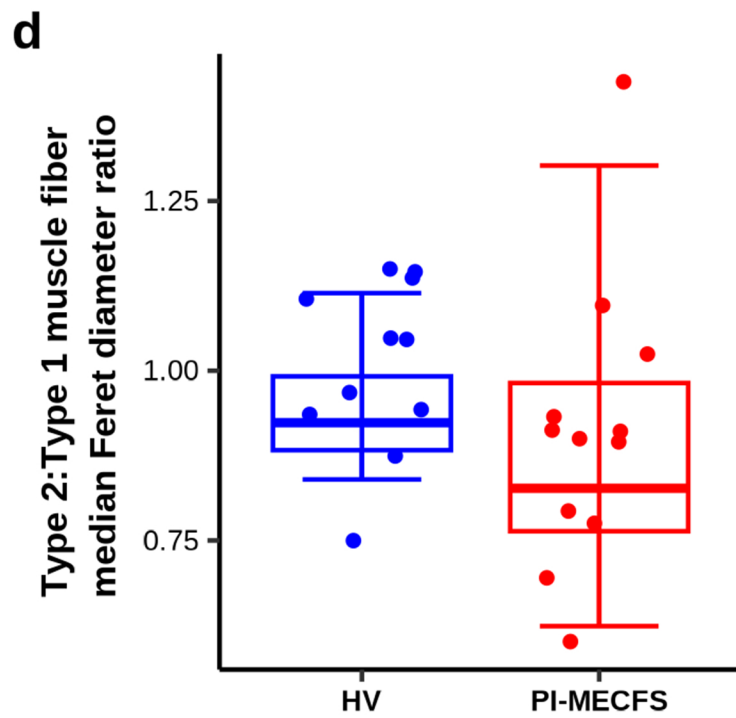

Figure S3: Mitochondrial flux assay and Type2:Type1 ratio of muscle fibers measurements: A-C. Boxplots of the indicated mitochondrial flux measurements on the y axis in HV (blue; n = 13 independent participants) and PI-ME/CFS (red; n = 14 independent participants) groups in A-B and C) in HVs (blue; n = 13 independent participants) and PI-ME/CFS (red; n = 15 independent participants) groups. No statistical differences were noted between groups. D. Boxplot of the Type2:Type1 muscle fiber median Feret diameter ratio obtained from biopsies of the vastus lateralis. No statistical difference was noted between groups of HVs (blue; n = 11 independent participants) and PI-ME/CFS (red; n = 12 independent participants) groups. For box plots a-d boxes depict the median (horizontal line) within quartiles 1–3 (bounds of box). Whiskers extend to minimum and maximum values. Source data are provided as a Source Data file.

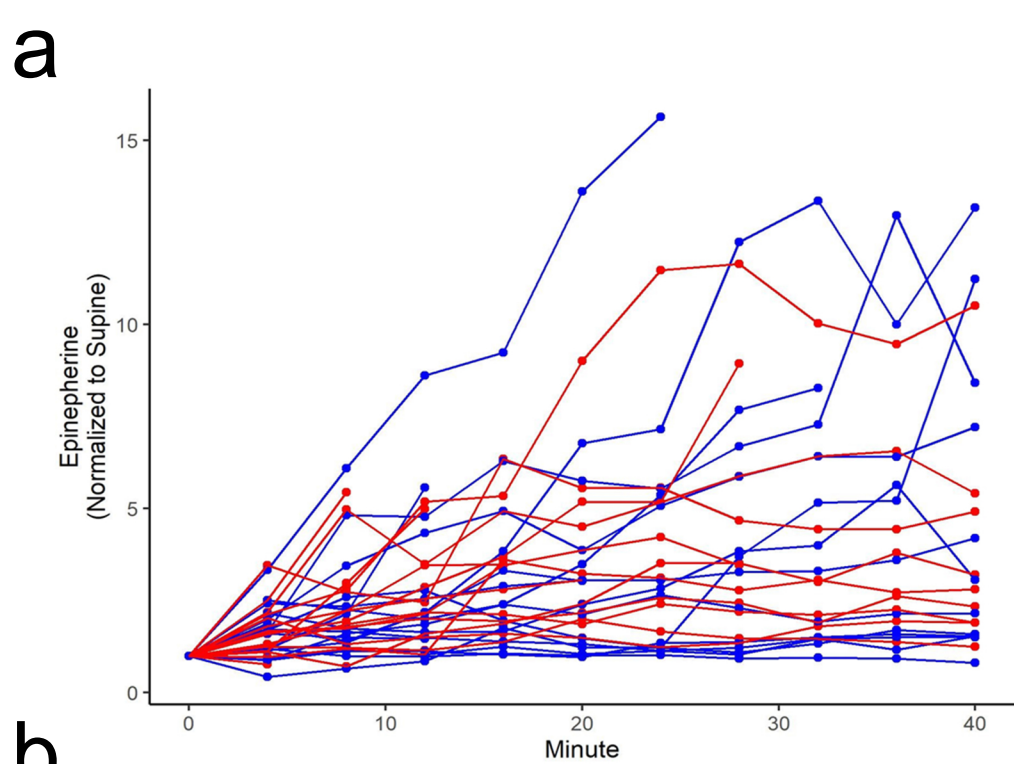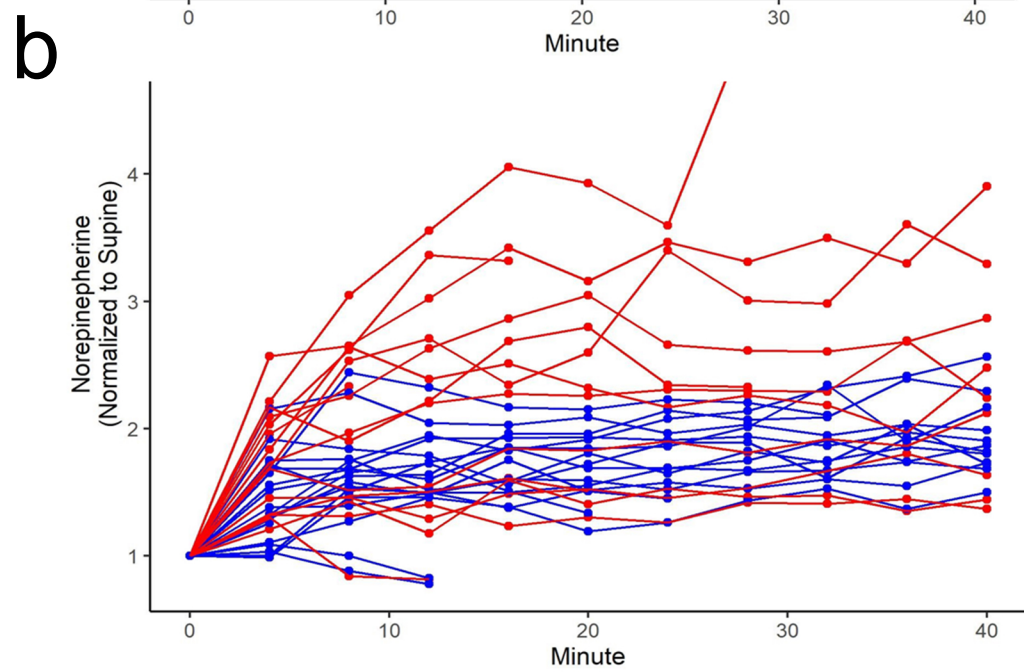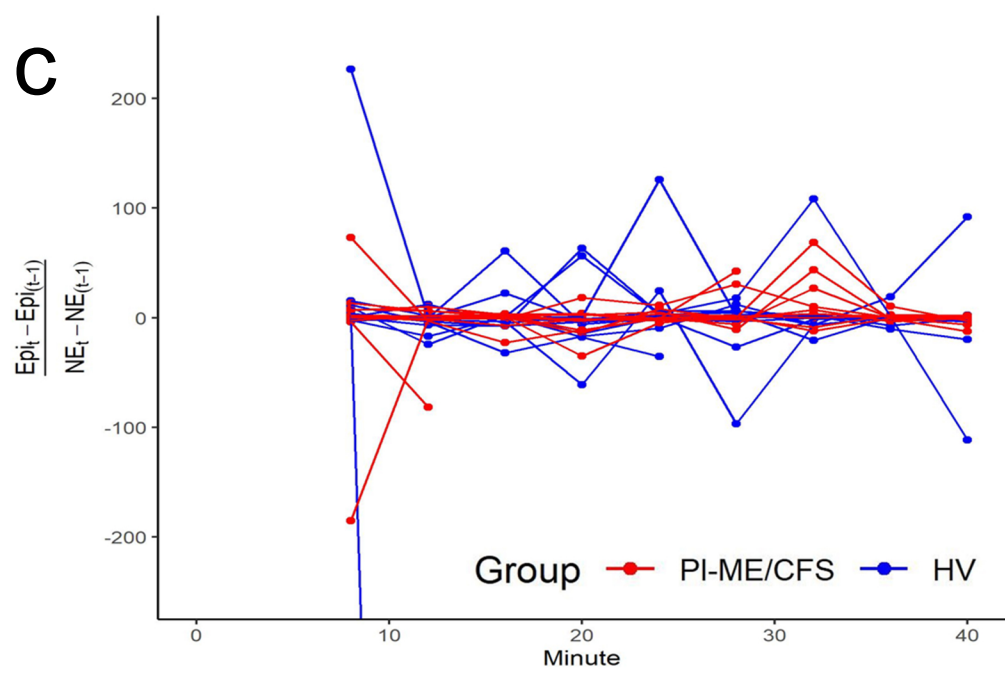

Figure S4: Serial plasma catecholamine levels measures during an orthostatic challenge: A. Plasma epinephrine levels normalized to resting value on the y axis and elapsed time on the x axis in HV (blue; n = 16 independent participants) and PI-ME/CFS (red; n = 16 independent participants). B. Plasma norepinephrine levels normalized to resting value on the y axis and elapsed time on the x axis in HV (blue; n = 16 independent participants) and PI-ME/CFS (red; n = 16 independent participants). C. Ratio of the change in Epinephrine:Norepinephrine levels on the y axis and elapsed time on the x axis in HV (blue; n = 16 independent participants) and PI-ME/CFS (red; n = 16 independent participants) volunteers. No difference in sympathoadrenal balance was noted between the groups. Abbreviations. Epi: epinephrine; NE: norepinephrine. Source data are provided as a Source Data file.



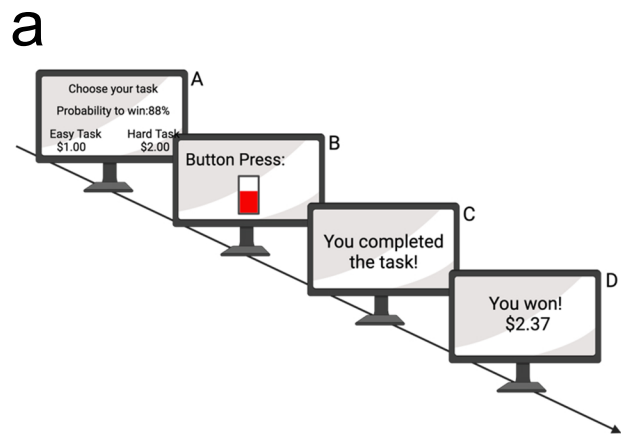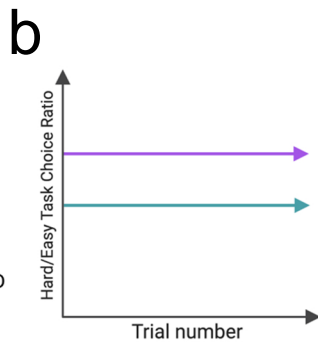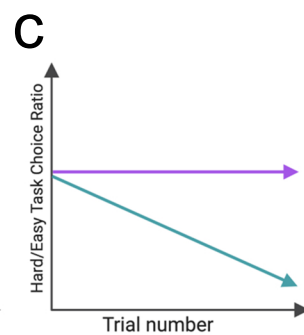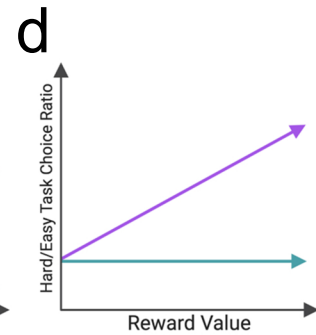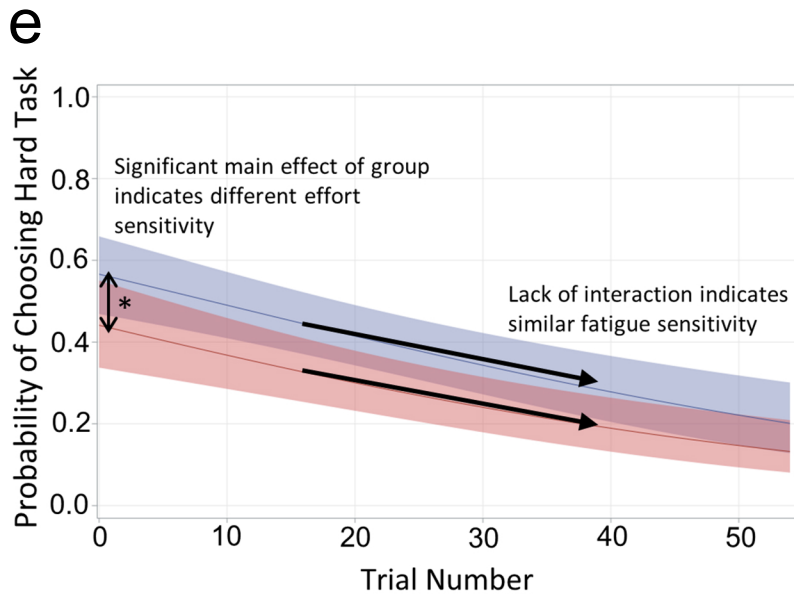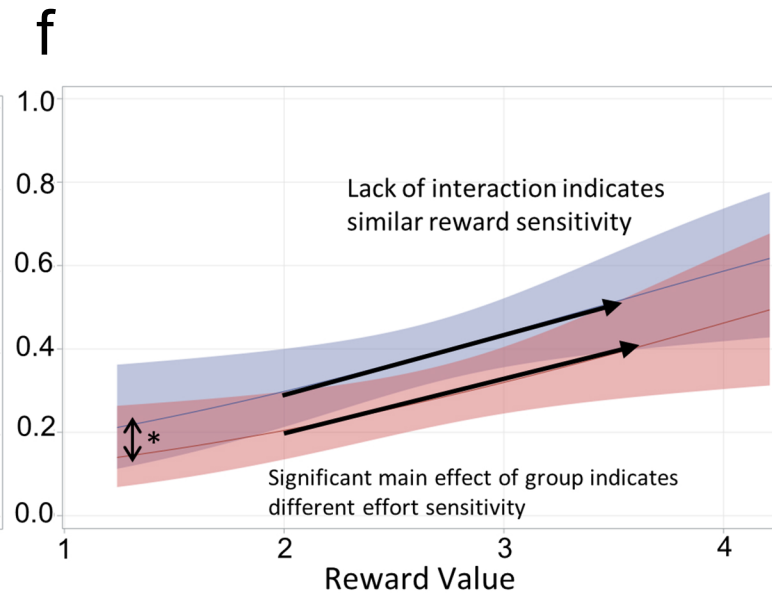

Figure S5: The Effort-Expenditure for Rewards Task (EEfRT):

A. Schematic diagram of a single trial of the modified Effort Expenditure for Rewards Task ('EEfRT'). A. 5s choice period in which subjects are presented with information regarding the reward magnitude of the hard task for that trial and probability of receiving any reward for that trial, B. Subjects make rapid button presses to complete the chosen task for 7s (easy task) or 21s (hard task), B. Subjects make rapid button presses to complete the chosen task for 7s (easy task) or 21s (hard task), C. Subjects receive feedback on whether they have completed the task, D. Subjects receive reward feedback as to whether they received a score increase for that trial (adapted from Treadway, 2009). B-D. Examples of the interpretation of results of the binary choice EEfRT task. Trial number is on the x-axis and the hard/easy task choice ratio or reward value on the Y-axis. (B) A difference in effort sensitivity is represented by a constant reduction in hard task choices throughout the entire task, with the blue group having lower effort sensitivity than gray. (C) A difference in fatigue sensitivity is represented by a gradual decline in hard task choices as trials increase, with the blue group demonstrating complete fatigue insensitivity and the gray group demonstrating fatigue sensitivity. (D) A difference in reward sensitivity is represented by an increase in hard task choices with increasing reward value, with the blue group demonstrating reward sensitivity and the gray being completely reward-insensitive. E. Effort and fatigue sensitivity of HV (blue; n = 17 independent participants) and PI-ME/CFS (red; n = 15 independent participants). PI-ME/CFS volunteers demonstrate significantly more effort sensitivity ( $p=0.04$ ) than HVs. No difference in fatigue sensitivity was noted between the groups. F. Reward sensitivity of HV (blue; n = 17 independent participants) and PI-ME/CFS (red; n = 15 independent participants). No significant difference in reward sensitivity was noted between the groups. A difference in effort sensitivity is again noted. Figure S5A created with Biorender. Source data are provided as a Source Data file.

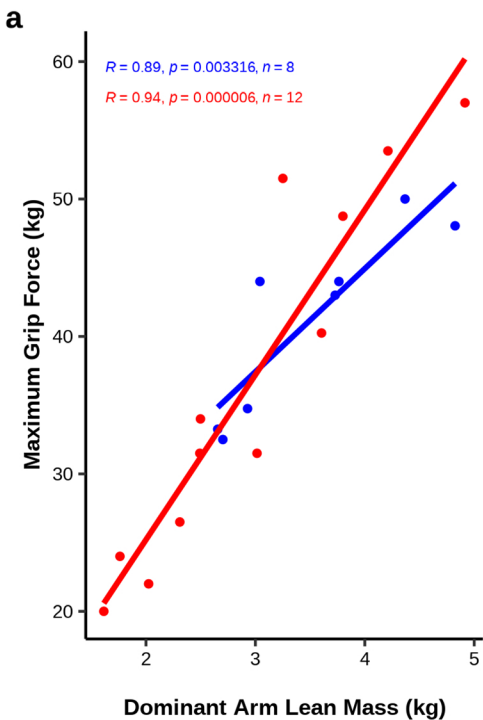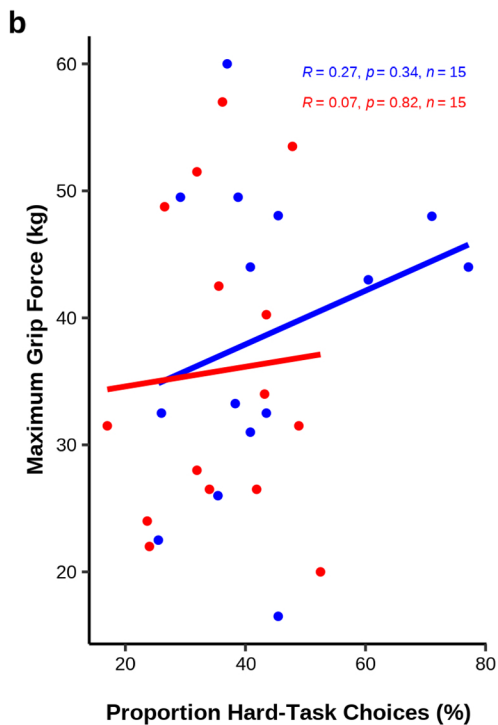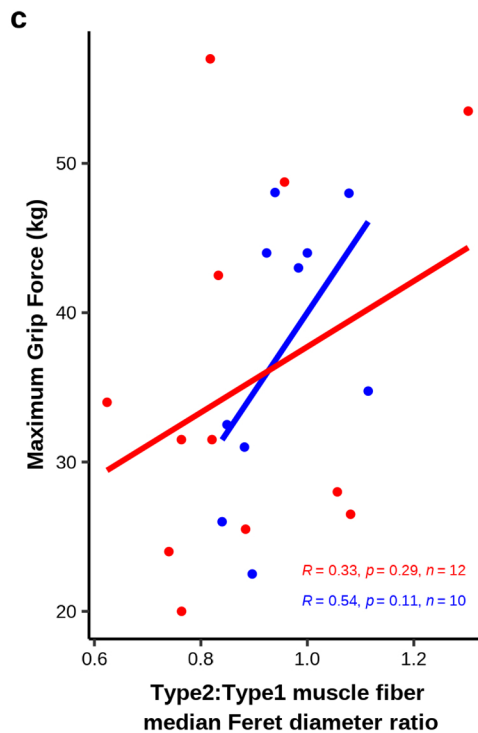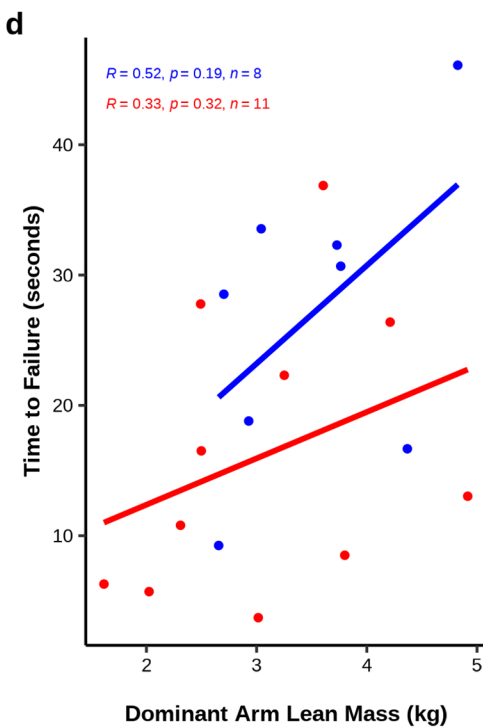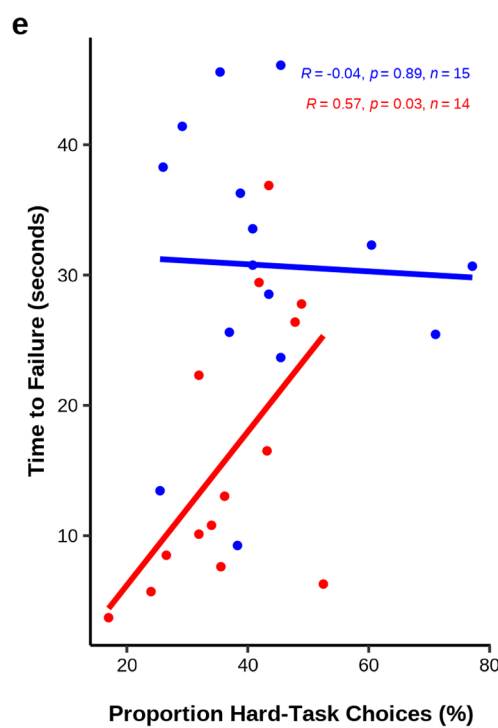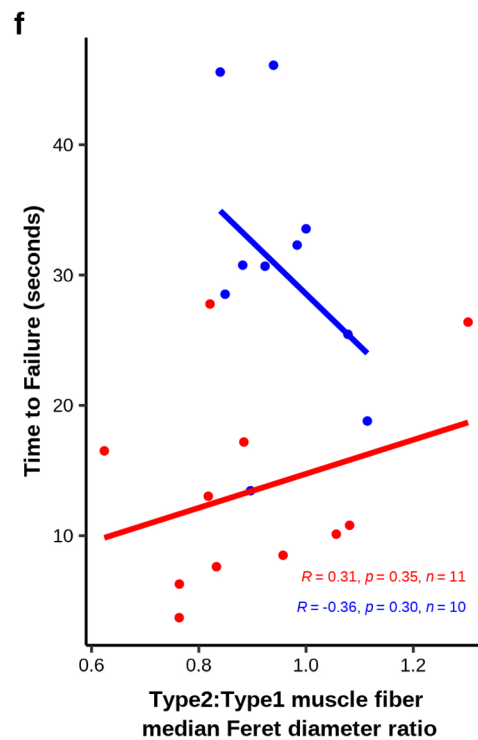

Figure S6: Correlations between single grip task performance and lean arm mass, effort preference, and Type2:Type1 median Feret diameter ratio of muscle fibers

A-C. Correlation between maximum grip force on the x axis and (A) dominant lean arm mass in HVs (blue; n = 8 independent participants) and PI-ME/CFS (red; n = 12 independent participants) groups, (B) proportion of hard task choices (i.e. effort preference) in HVs (blue; n = 15 independent participants) and PI-ME/CFS (red; n = 15 independent participants) groups, and (C) Type2:Type1 muscle fiber median Feret diameter ratio for HV (blue; n = 10 independent participants) and PI-ME/CFS (red; n = 12 independent participants) volunteers. D-F. Correlation between Time to Failure on the x axis and (D) dominant lean arm mass in HVs (blue; n = 8 independent participants) and PI-ME/CFS (red; n = 11 independent participants) groups, (E) proportion of hard task choices (i.e. effort preference) in HVs (blue; n = 15 independent participants) and PI-ME/CFS (red; n = 14 independent participants) groups, and (F) Type2:Type1 muscle fiber median Feret diameter ratio for HV (blue; n = 10 independent participants) and PI-ME/CFS (red; n = 11 independent participants) volunteers. The relationship between indicated variables in x and y axis were fitted by linear regression in each group with a linear regression t-test to determine non-zero slope. The exact p value of the regressions are presented on the graph. Source data are provided as a Source Data file.

**a**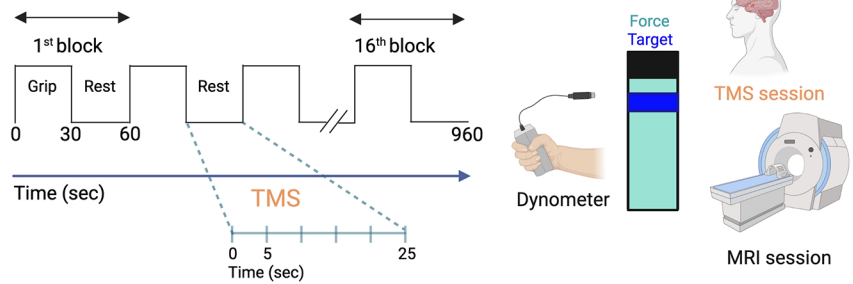**b**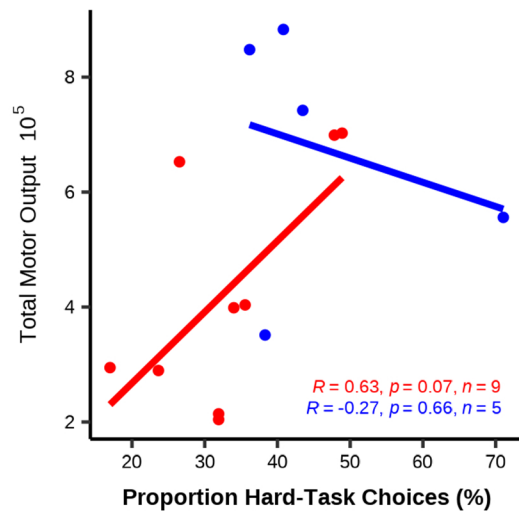**c**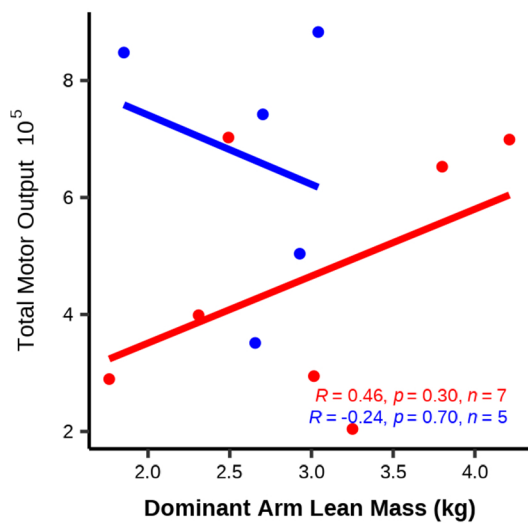**d**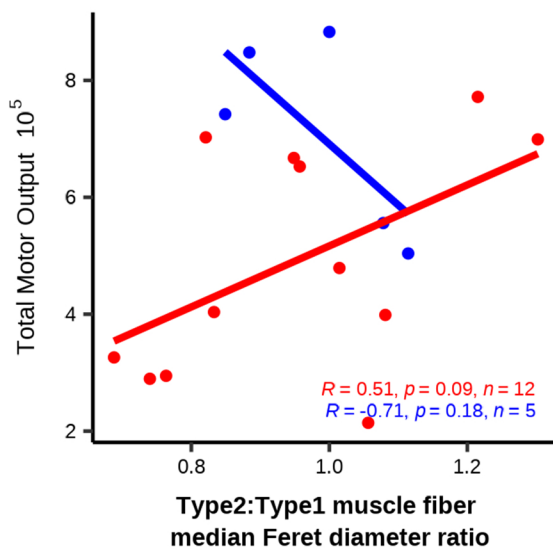**e**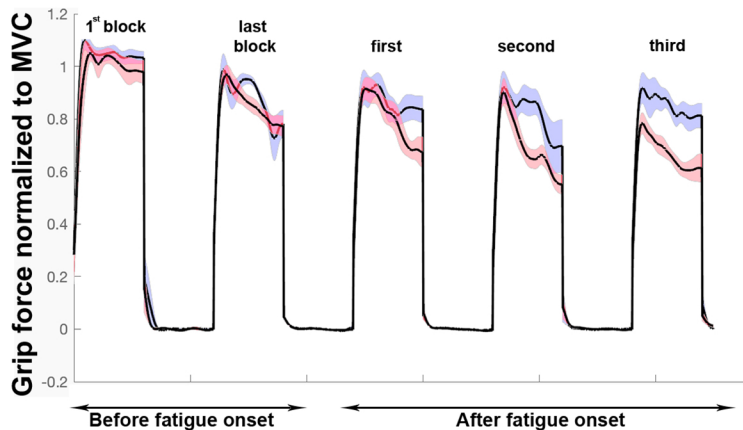

Figure S7: Repetitive grip strength testing and correlations between total motor output and lean arm mass, effort preference, and Type2:Type1 ratio of muscle fibers

A. Schema of repetitive grip strength testing. Volunteers sought to maintain their grip at 50% of maximum voluntary contraction in successive blocks of 30 seconds interspaced with 30 second rest blocks. For the transcranial magnetic stimulation (TMS) experiment, single pulse TMS was done to probe excitability of the primary motor cortex (M1) via the motor evoked potential (MEP) of the abductor pollicis brevis during the rest blocks. For the functional magnetic resonance imaging (fMRI) experiment, the paradigm was performed while undergoing MRI scanning of the brain. B-D. Correlation between total motor output on the x axis and (B) proportion of hard tasks choices (i.e. effort preference) in HVs (blue; n = 5 independent participants) and PI-ME/CFS (red; n = 9 independent participants) groups, (C) dominant lean arm mass in HVs (blue; n = 5 independent participants) and PI-ME/CFS (red; n = 7 independent participants) groups, and (D) Type2:Type1 muscle fiber median Feret diameter ratio for HV (blue; n = 5 independent participants) and PI-ME/CFS (red; n = 12 independent participants) volunteers during the TMS experiment. E. Grip force during fMRI task normalized to maximum voluntary contraction in the first block, the last block prior to fatigue onset, and the first three blocks after fatigue onset in HV (blue; n = 10 independent participants) and PI-ME/CFS cohorts (red; n = 8 independent participants). A significant difference was noted between the groups (Decline rate:  $-6.3 \pm 5$  versus  $-11.9 \pm 3$ ,  $t(16) = 2.83$ ,  $p = 0.01$ ). Figure S7A created with Biorender. Source data are provided as a Source Data file.

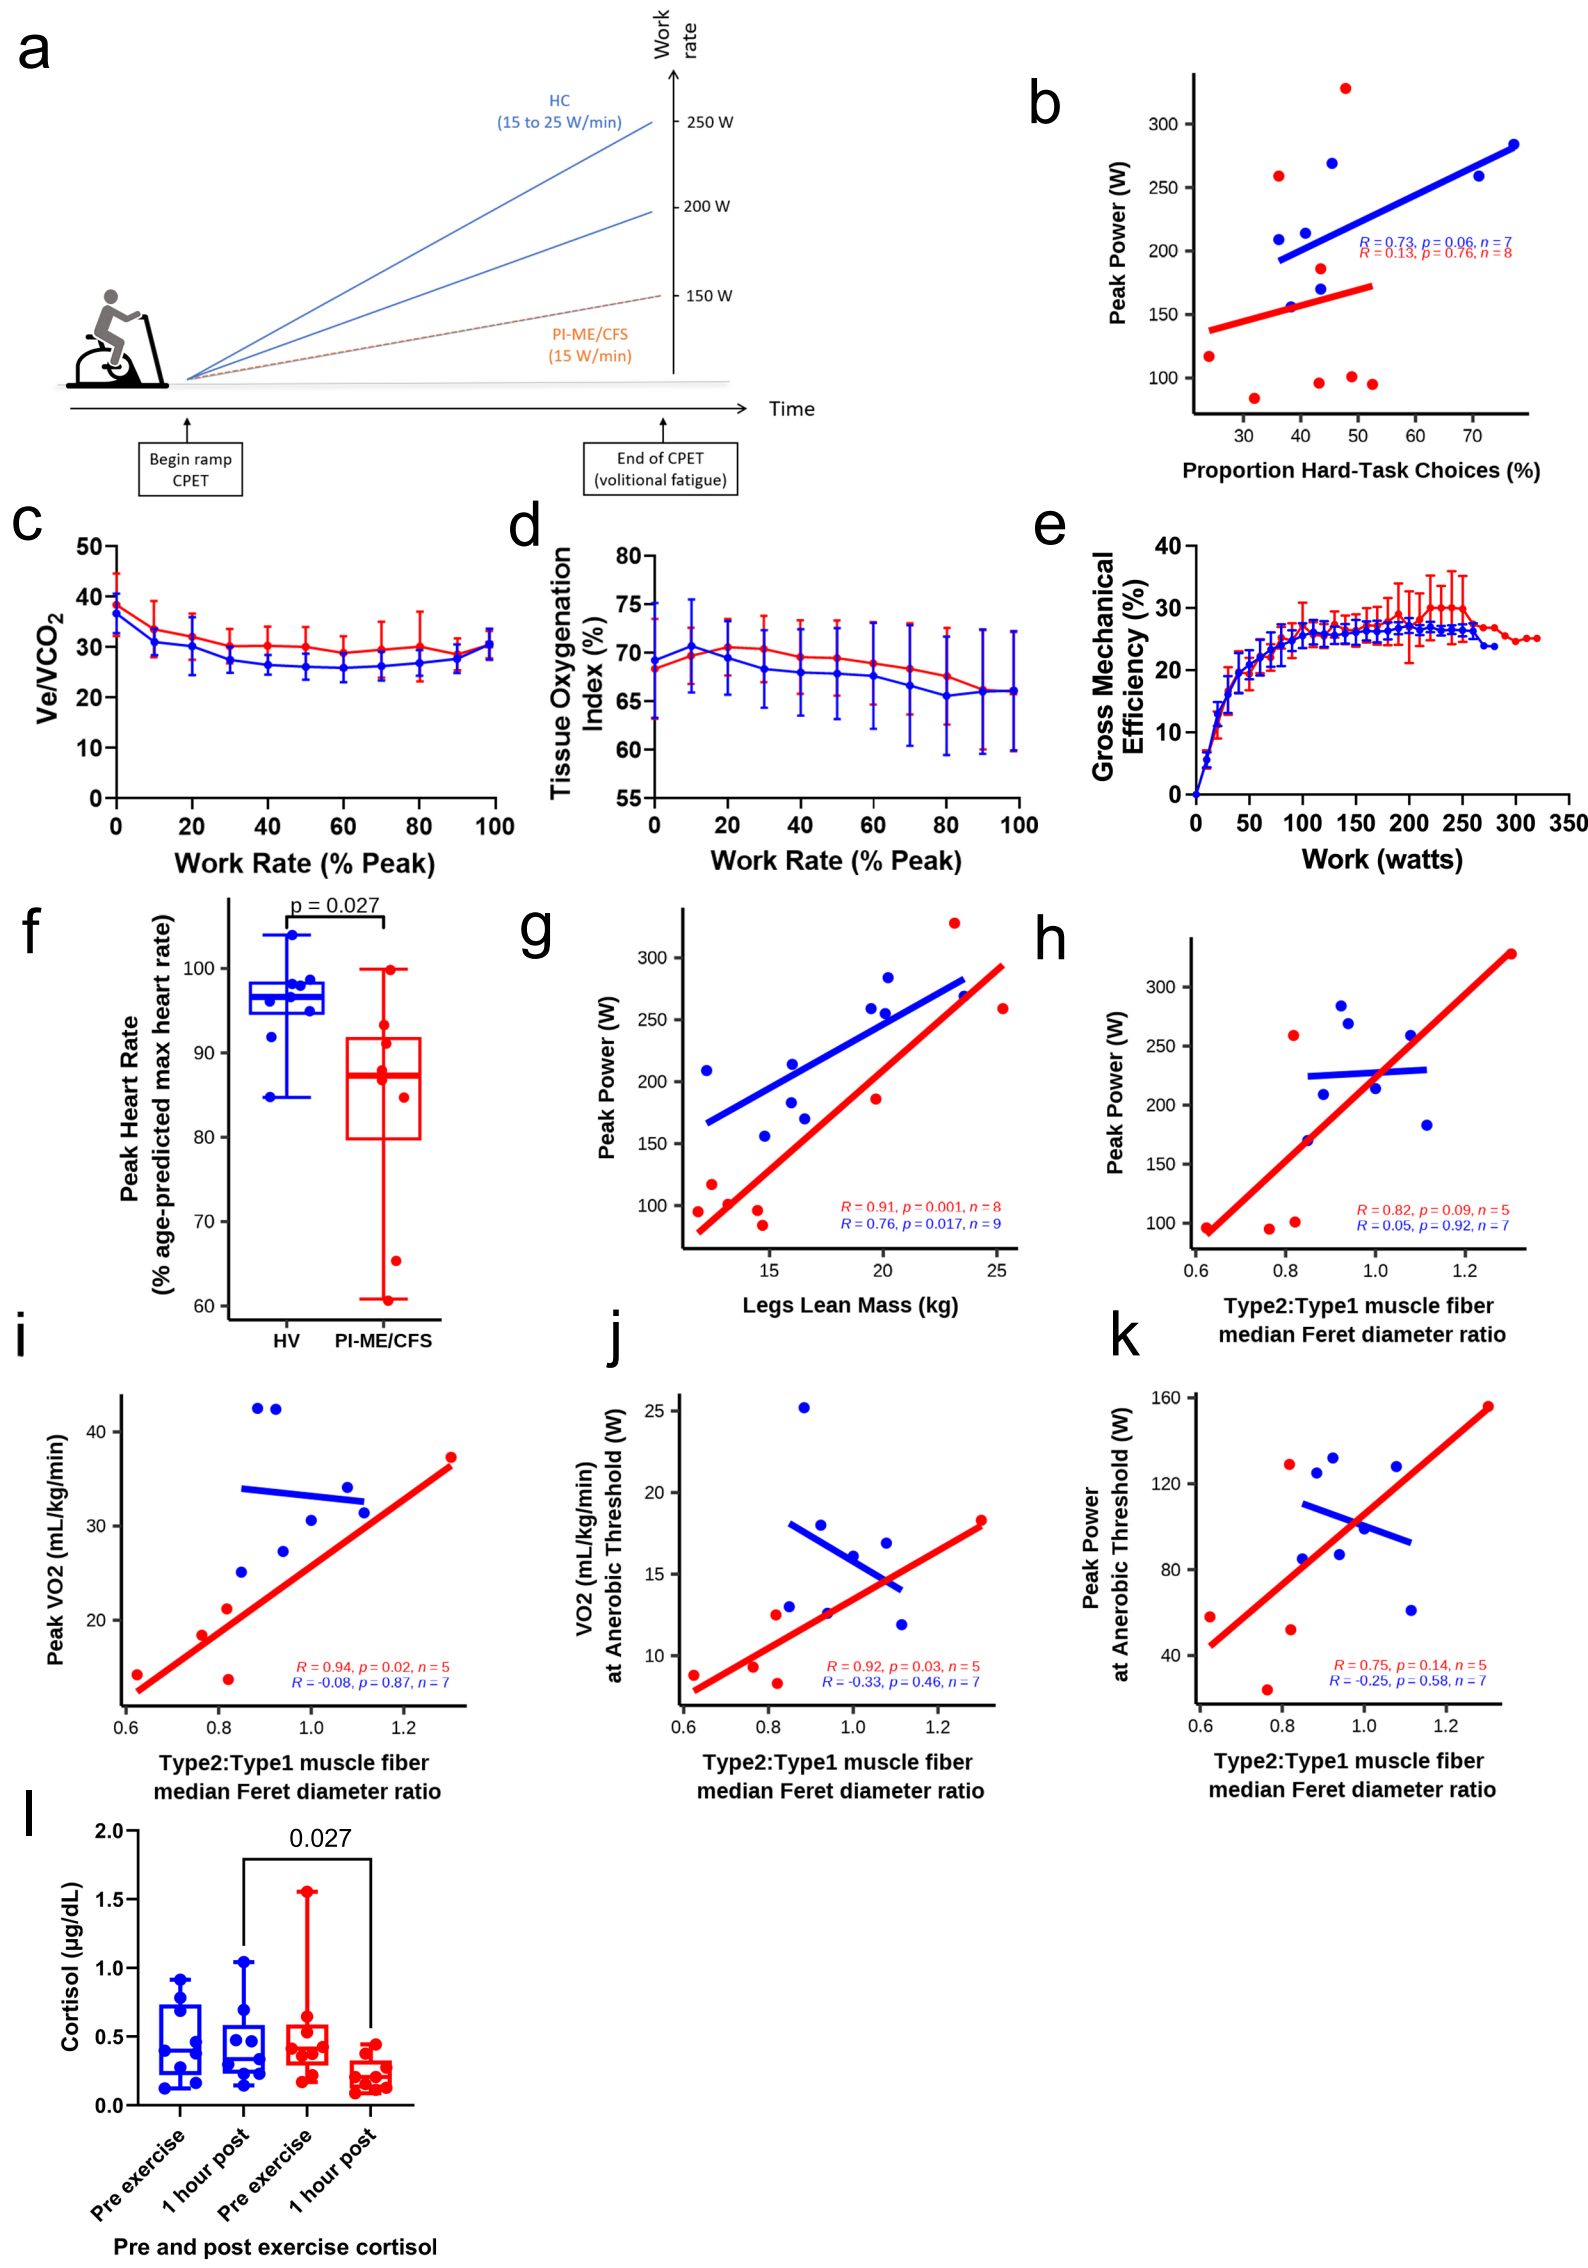

## Figure S8: Cardiopulmonary Exercise Test (CPET)

A. Schema of CPET. Upright cycle ergometry was used to evaluate cardiorespiratory function. To achieve the peak work rate during a testing time of 8-12 minutes, groups were tested at 15 Watts/min (PI-ME/CFS) and 15-25 Watts/min (HV). Testing was ended when volunteers were unable to keep up with the increasing work rate. B. Correlation between peak power and proportion of hard task choices for HV and PI-ME/CFS volunteers. C. Ratio of Ventilation/ $VCO_2$  with peak work (%) for HV (blue; n = 9 independent participants) and PI-ME/CFS (red; n = 8 independent participants) volunteers. D. Oxygenation of the quadriceps muscle measured with Near Infrared Spectroscopy with work rate (% of peak) for HV (blue; n = 6 independent participants) and PI-ME/CFS (red; n = 6 independent participants) volunteers. E. Gross mechanical efficiency (%) with work (Watts) for HV (blue; n = 9 independent participants) and PI-ME/CFS (red; n = 8 independent participants) volunteers. F. Boxplot of % age predicted heart rate for HV (blue; n = 9 independent participants) and PI-ME/CFS (red; n = 8 independent participants) volunteers using unadjusted two-sided t-test for independent samples with equal variance ( $p = 0.042$ ). For F, boxes depict the median (horizontal line) within quartiles 1–3 (bounds of box). Whiskers extend to minimum and maximum values. G-H. Correlation between peak power and (G) lean leg mass and (H) Type2:Type1 muscle fiber median Feret diameter ratio for HV and PI-ME/CFS volunteers. I-K. Correlation between Type2:Type1 muscle fiber median Feret diameter ratio and (I) peak  $VO_2$ , (J)  $VO_2$  at the anaerobic threshold, and (K) peak power at the anaerobic threshold for HV and PI-ME/CFS volunteers. For figures B and G-K, the relationship between indicated variables were fitted by linear regression in each group with linear regression t-tests used to determine significant correlations. The exact p value and sample sizes are presented on the graph. L. Salivary cortisol levels measured the morning prior to CPET and one hour after CPET for HV (blue; n = 11 independent participants) and PI-ME/CFS (red; n = 15 independent participants) volunteers. Source data are provided as a Source Data file.



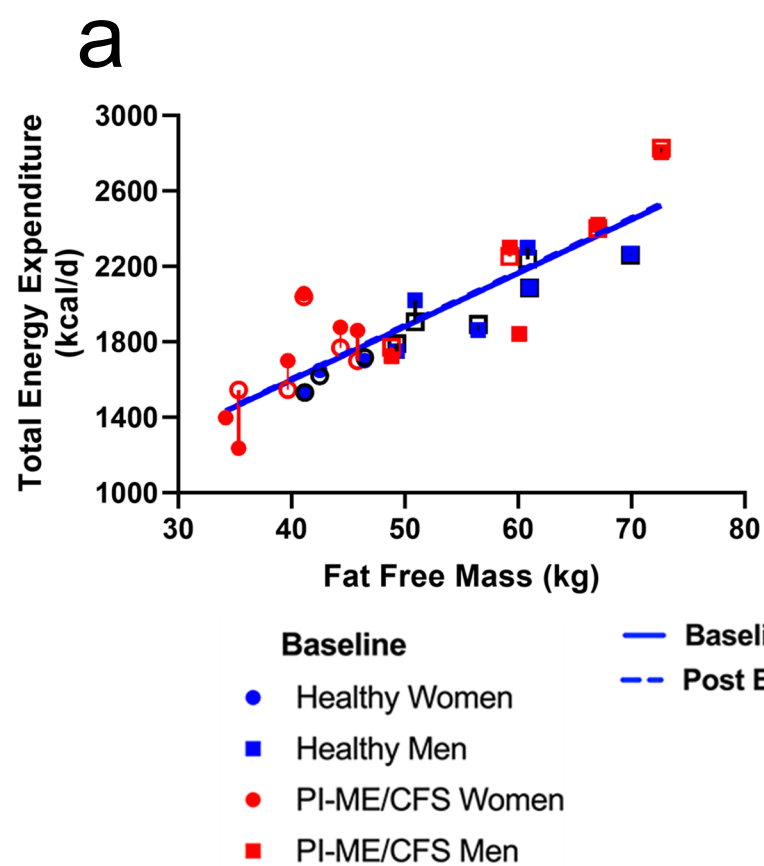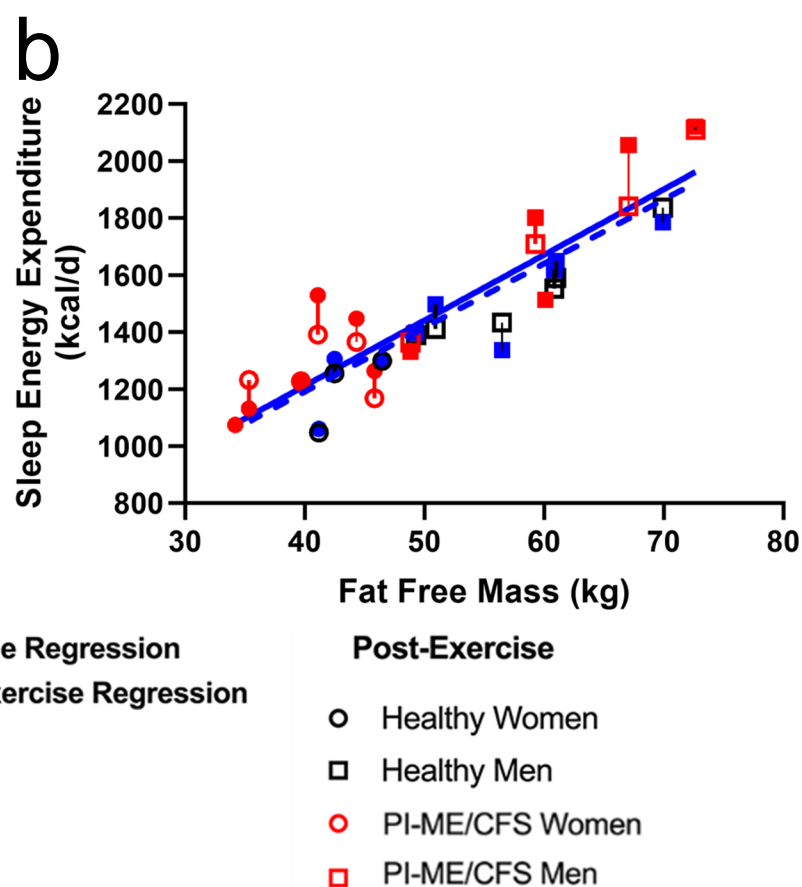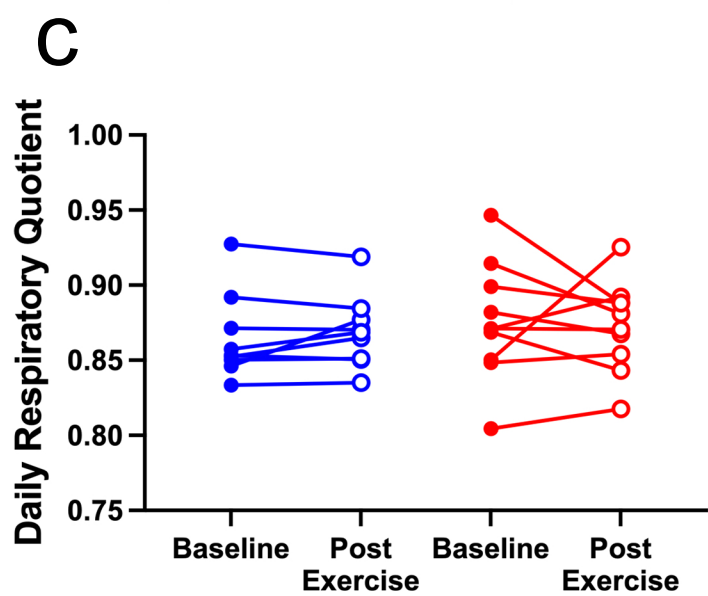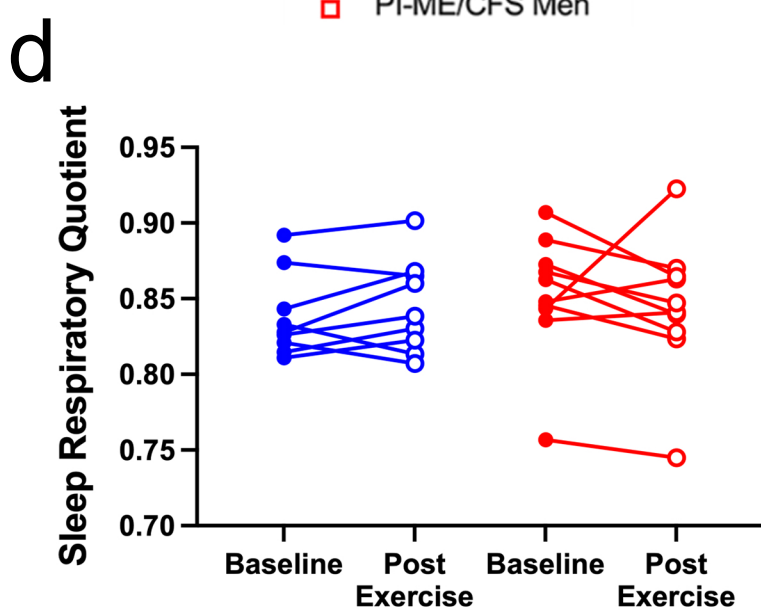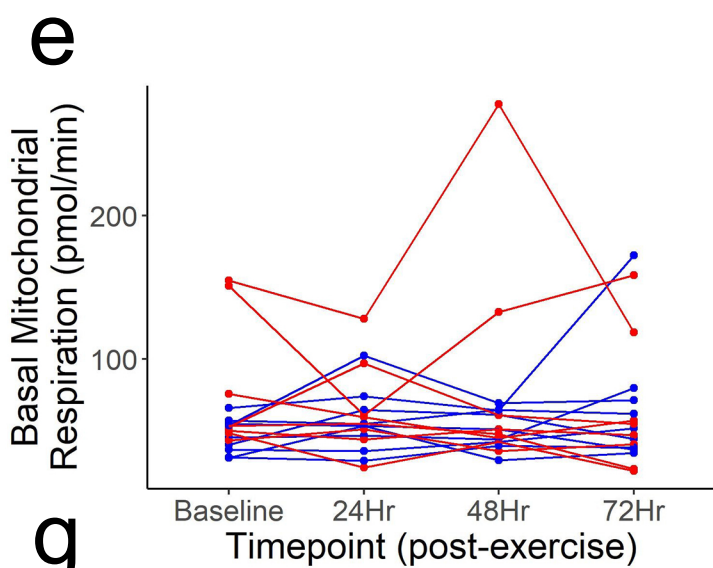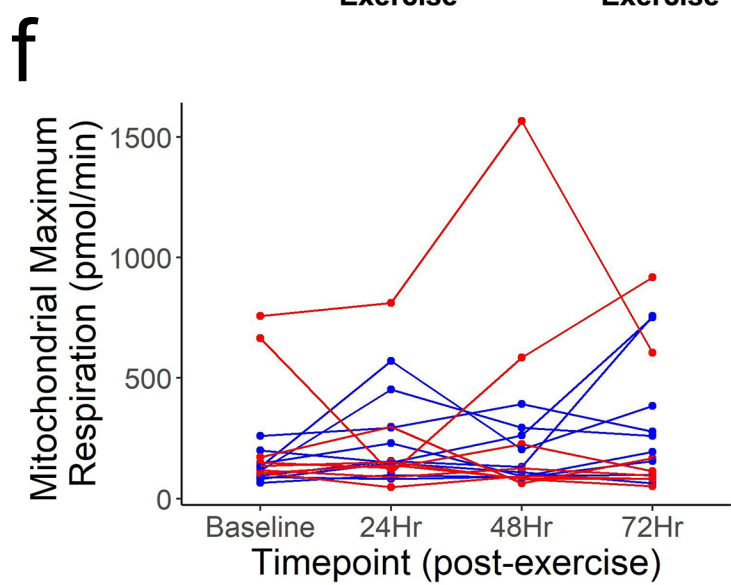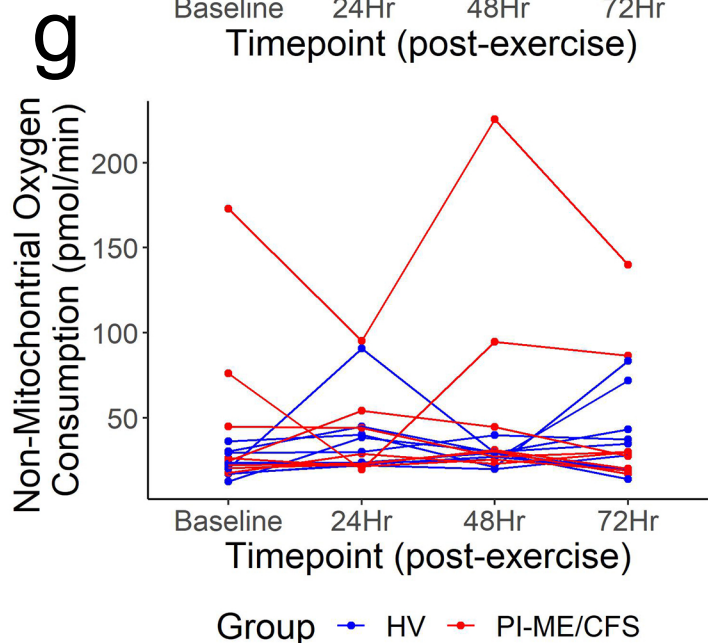

Figure S9: Total body energy expenditure, sleeping energy expenditure, and respiratory quotient measurements at baseline and 48 hours after cardiopulmonary exercise testing (CPET) A-B. Correlation of fat free mass on the x axis with (A) total body energy expenditure and (B) sleeping energy expenditure on the y axis for HV (blue; n = 10 independent participants) and PI-ME/CFS (red; n = 14 independent participants). Squares represent males and circles represent females. Solid data points are baseline measurements, open data points are measurements 48 hours after CPET. No statistically significant differences in total or sleeping energy expenditure was noted between the groups. C-D. Respiratory quotient measurements taken (C) daily and (D) sleeping at baseline and 48 hours after CPET for HV (blue; n = 9 independent participants) and PI-ME/CFS (red; n = 10 independent participants). E-G. Serial mitochondrial flux assay measurements of peripheral blood mononuclear cells immediate before (baseline), 24, 48, and 72 hours after CPET for HV (blue; n = 9 independent participants) and PI-ME/CFS (red; n = 8 independent participants). No differences were observed in (E) basal, (F) maximum respiration, and (G) non-mitochondrial oxygen consumption between the groups. Source data are provided as a Source Data file.

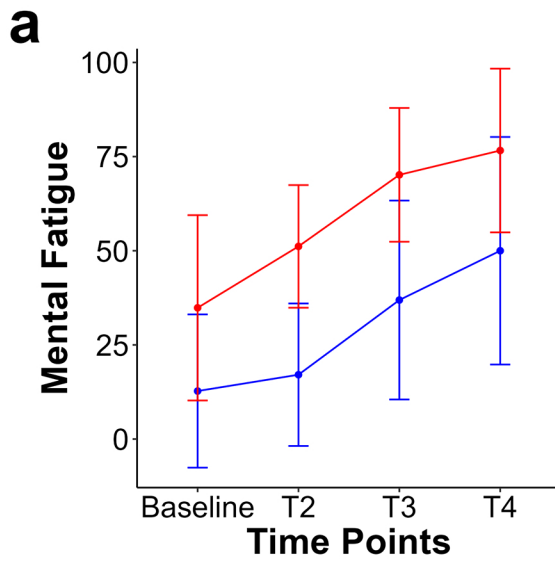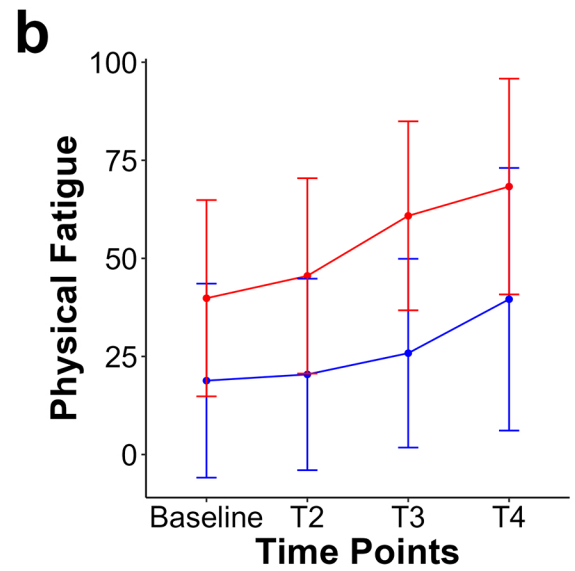

● HV  
● PI-ME/CFS

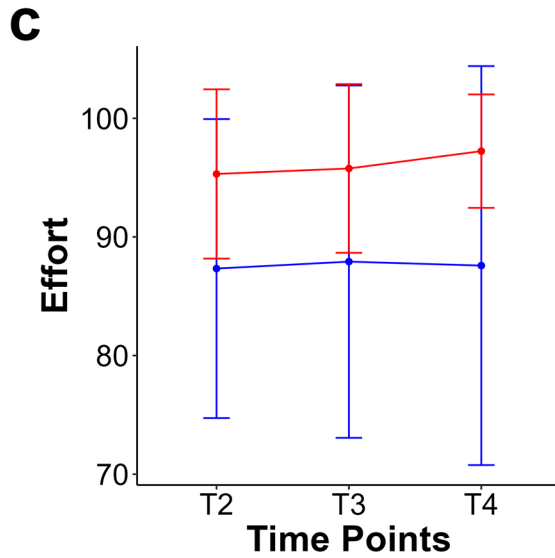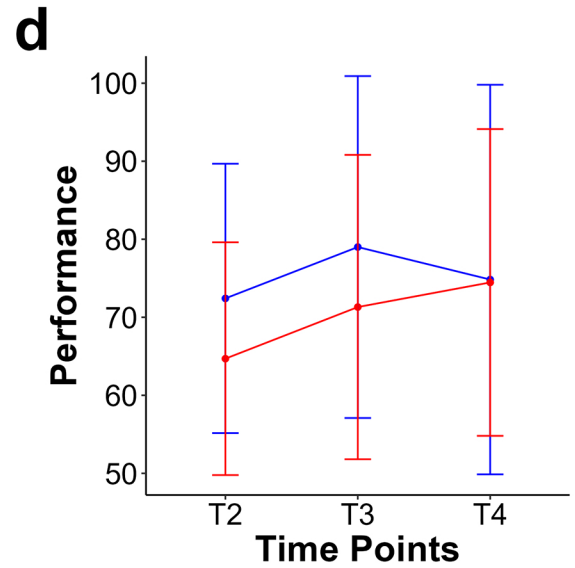

Figure S10: Serial visual analog scales of mental and physical fatigue, perceived effort, and perceived performance during a cognitive testing battery

A-D. Visual analog scale from 0 -100 points of (A) mental fatigue, (B) physical fatigue, (C) perceived effort, and (D) perceived performance on the y axis and elapsed time on the x axis for HV (blue; n = 12 independent participants) and PI-ME/CFS (red; n = 13 independent participants). Each time point represents approximately one elapsed hour. Data represented as means and standard deviations. Source data are provided as a Source Data file.

**a**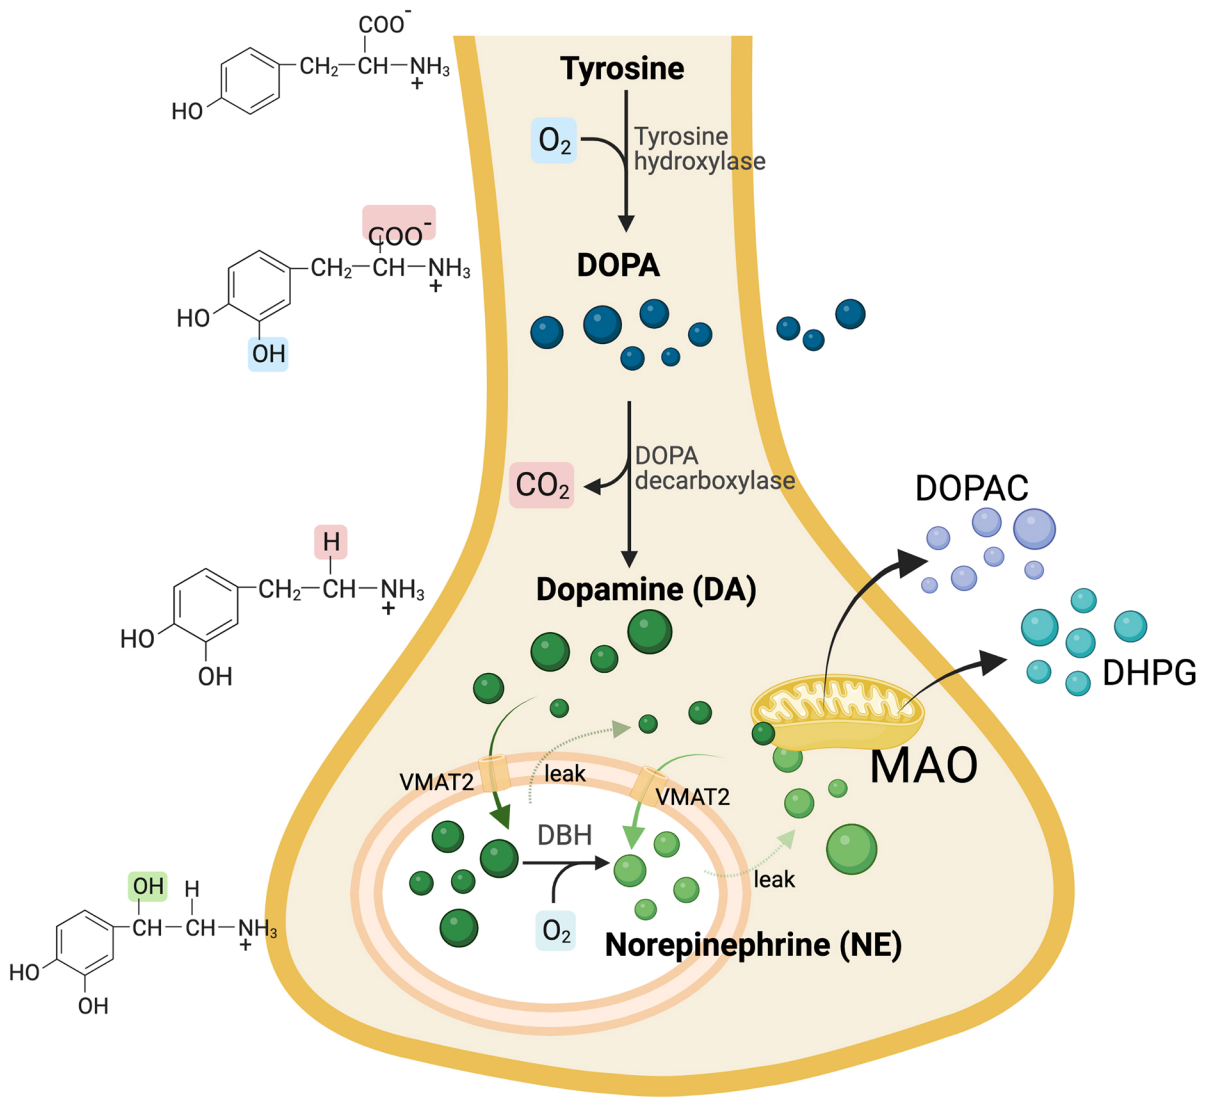**b**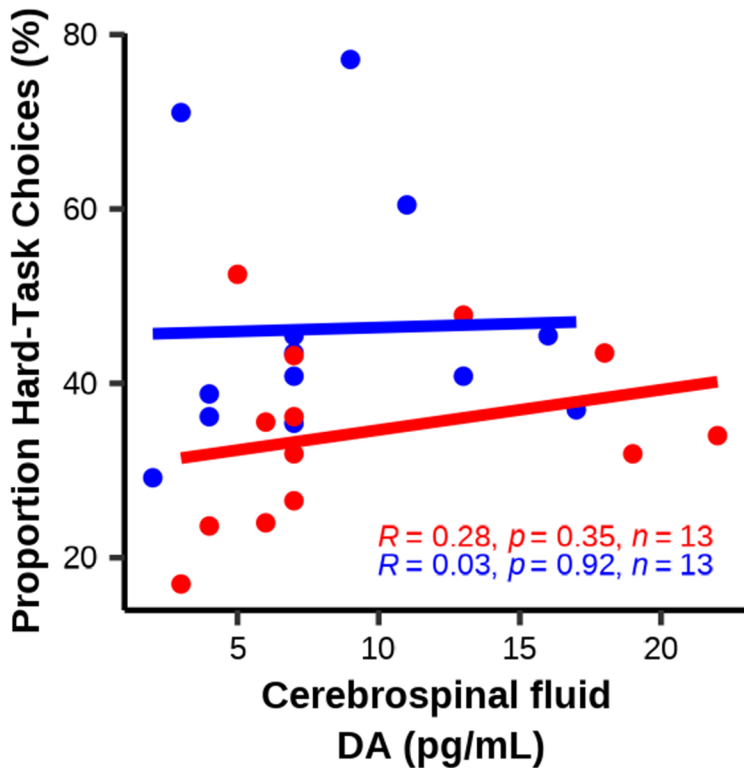**c**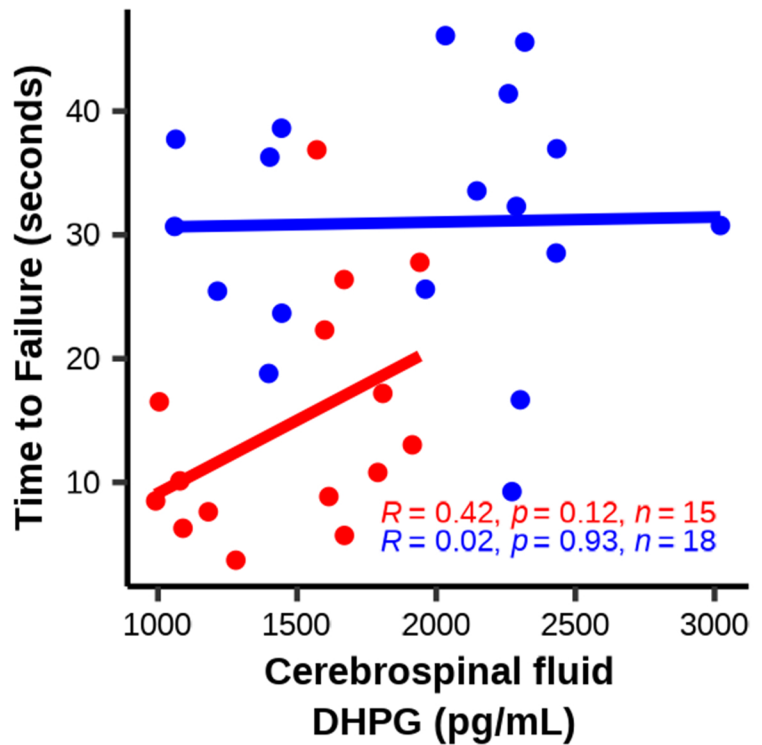

Figure S11: Correlations between cerebrospinal fluid catecholamines with time to failure on the single grip task and effort preference.

A. Concept diagram relating cerebrospinal levels of catechols to intra-neuronal reactions and reactants in central catecholaminergic neurons. DOPAC and DHPG are the main respective neuronal metabolites of DA and NE. Alterations in processes within catecholaminergic neurons produce predictable patterns of cerebrospinal levels of catechols. B. Correlation of cerebrospinal fluid dopamine (DA) with proportion of hard task choices (i.e., effort preference) for HV (blue; n = 13 independent participants) and PI-ME/CFS participants (red; n = 13 independent participants). C. Correlation of cerebrospinal fluid dihydroxyphenylglycol (DHPG) with Time to failure in HVs (blue; n = 14 independent participants) and PI-ME/CFS (red; n = 14 independent participants) groups. The relationship between indicated variables in x and y axis were fitted by linear regression. The exact p value of the regression is presented on the graph. Abbreviations. TH: Tyrosine hydroxylase, DOPA: Precursor to dopamine, LAAAD: L-aromatic-amino-acid decarboxylase, DA: Dopamine, DBH: Dopamine beta-hydroxylase, NE: Norepinephrine, VMAT: Vesicular monoamine transporter, MAO: Monoamine oxidase, ALDH: Aldehyde dehydrogenase, AR: Androgen Receptor, DOPAC: 3,4-Dihydroxyphenylacetic acid, DHPG: (S)-3,5-Dihydroxyphenylglycine. Figure 11A created with Biorender. Source data are provided as a Source Data file.

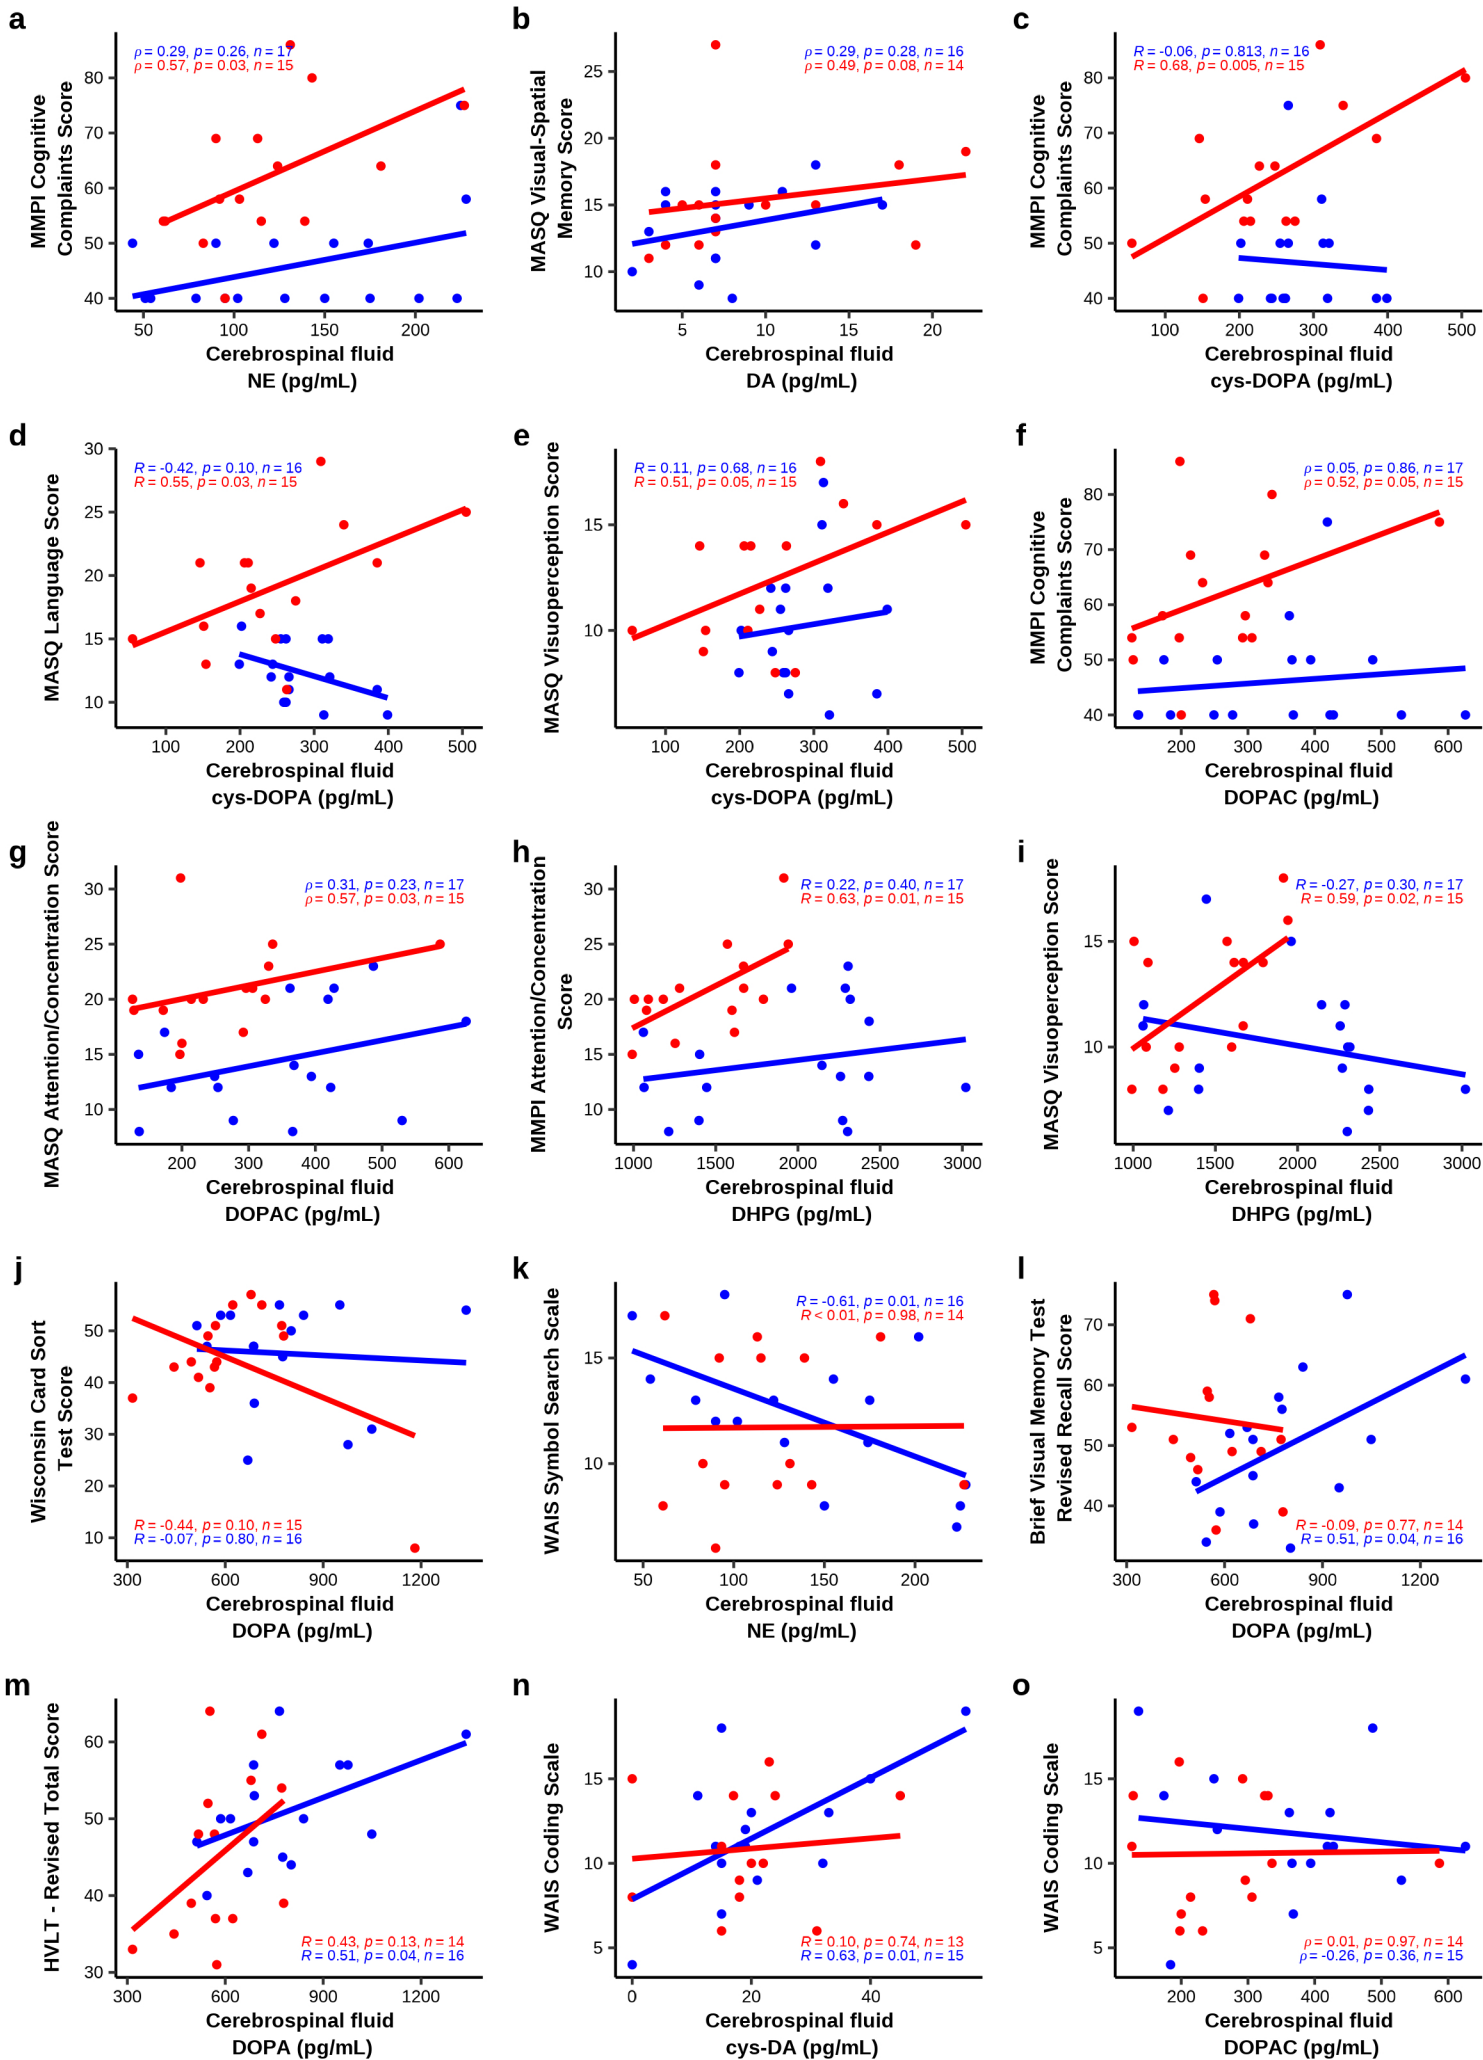

Figure S12: Correlations between cerebrospinal fluid catecholamines with cognitive complaints and performance on neuropsychological tests

A. Correlation of cerebrospinal fluid norepinephrine (NE) with total cognitive complaints score for HV (blue) and PI-ME/CFS (red). B. Correlation of cerebrospinal fluid dopamine (DA) with visual-spatial memory score for HV and PI-ME/CFS. C-E. Correlation of cerebrospinal fluid cys-DOPA with (C) total cognitive complaints, (D) language, and (E) visuoperception scores for HV and PI-ME/CFS. F-G. Correlation of cerebrospinal fluid dopamine DOPAC with (F) total cognitive complaints and (G) attention/concentration scores for HV and PI-ME/CFS. H-I. Correlation of cerebrospinal fluid DHPG with (H) attention/concentration complaints and (I) visuoperception scores for HV and PI-ME/CFS. J. Correlation of cerebrospinal fluid DOPA with the Wisconsin Card Sort Test score for HV and PI-ME/CFS. K. Correlation of cerebrospinal fluid norepinephrine (NE) with WAIS Symbol Search Scale score for HV and PI-ME/CFS. L-M. Correlation of cerebrospinal fluid DOPA with (L) Brief Visual Memory Test-Revised Recall and (M) Hopkins Verbal Learning Test-Revised Total scores for HV and PI-ME/CFS. N. Correlation of cerebrospinal fluid cys-dopamine with the WAIS Coding Scale for HV and PI-ME/CFS. O. Correlation of cerebrospinal fluid DOPAC with the WAIS Coding Scale for HV and PI-ME/CFS. The relationship between indicated variables in x and y axis were fitted by linear regression with linear regression t-tests used to determine non-zero slope. The exact p values, correlation coefficients, and sample sizes are presented in each panel of the figure for the respective groups. Correlation was determined by performing a Shapiro-Wilk test to determine normality of the data and then a Pearson correlation was used for normally distributed data and a Spearman correlation was used for non-normally distributed data. Source data are provided as a Source Data file.



**a**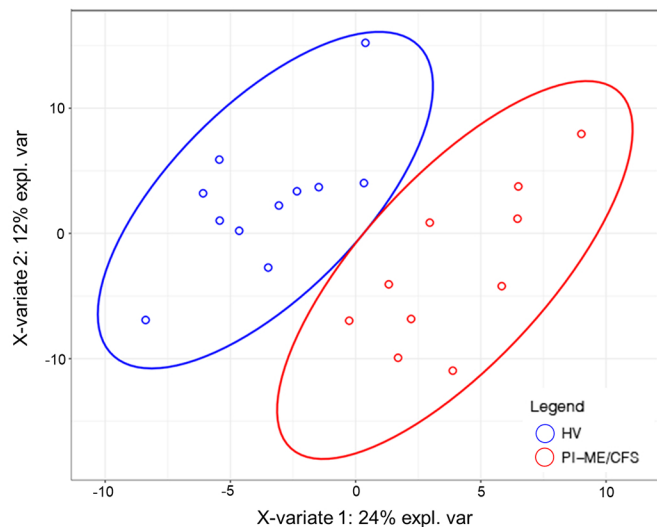**d**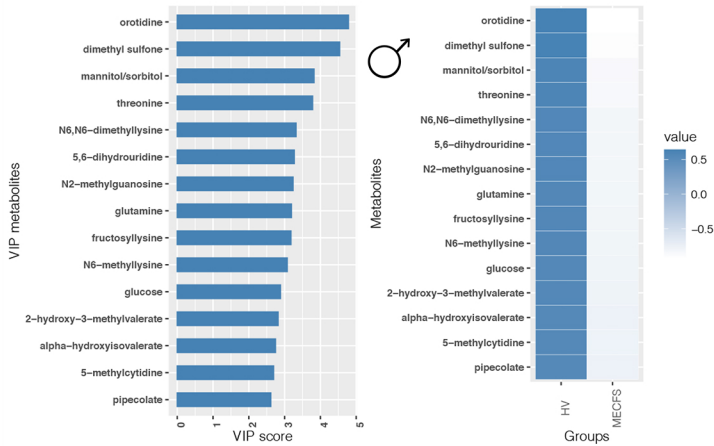**b**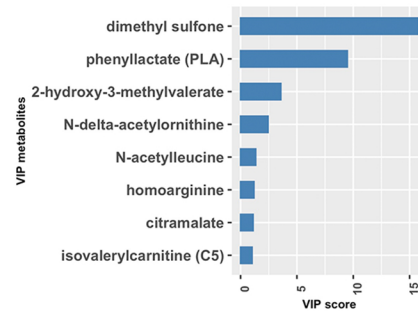**c**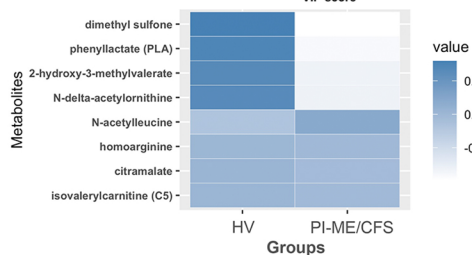**e**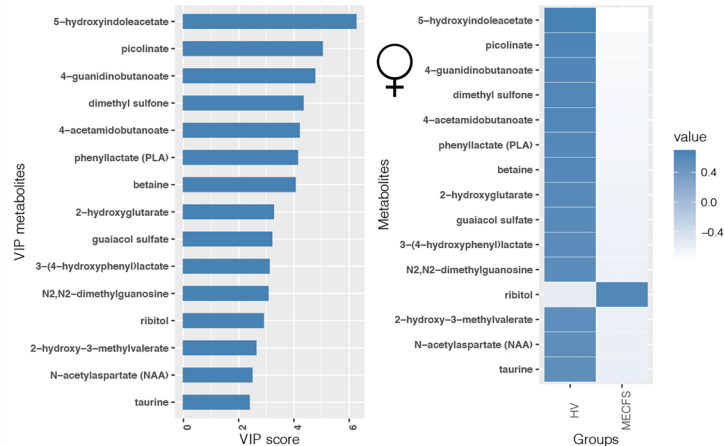

Figure S13: Multivariate analysis of the metabolomics on the cerebrospinal fluid (CSF) samples in HV and PI-ME/CFS cohorts:

A. Final partial least square discriminant analysis (PLSDA) supervised clustering showing HV (blue; n = 21 independent participants) and PI-ME/CFS (red; n = 17 independent participants) sample groups. B. Variable importance in prediction (VIP) scores of metabolites with VIP score >1. C. The heatmap of the average scaled expression values for the indicated VIP metabolites. D-E. Variable importance in prediction (VIP) scores of the metabolites after PLSDA multivariate analysis and the heatmap of the average scaled expression values for the indicated VIP metabolites, in (D) male cohorts (HV n = 10 independent participants and PI-ME/CFS n = 7 independent participants) and (E) female cohorts (HV n = 11 independent participants and PI-ME/CFS n = 10 independent participants). Source data are provided as a Source Data file.



Figure S14: Male and female cohorts have distinct perturbation in immune cell subpopulation and biological processes in PBMCs:

A-B. Protein-Protein interactome of a subset of DE genes from PBMC samples analyzed in the (A) male and (B) female (cohorts and the fold change information are overlaid on the nodes. Red color indicates upregulation and blue color indicated downregulation in PI-ME/CFS group. Source data are provided as a Source Data file.

**a**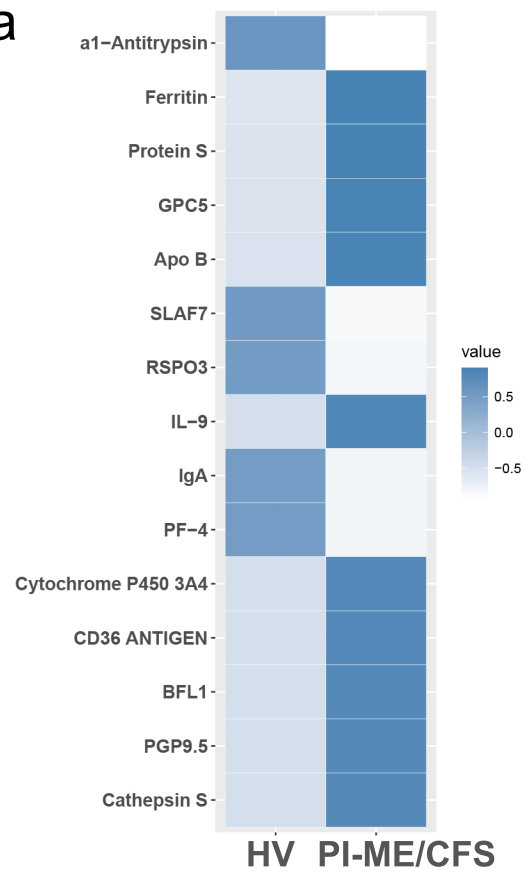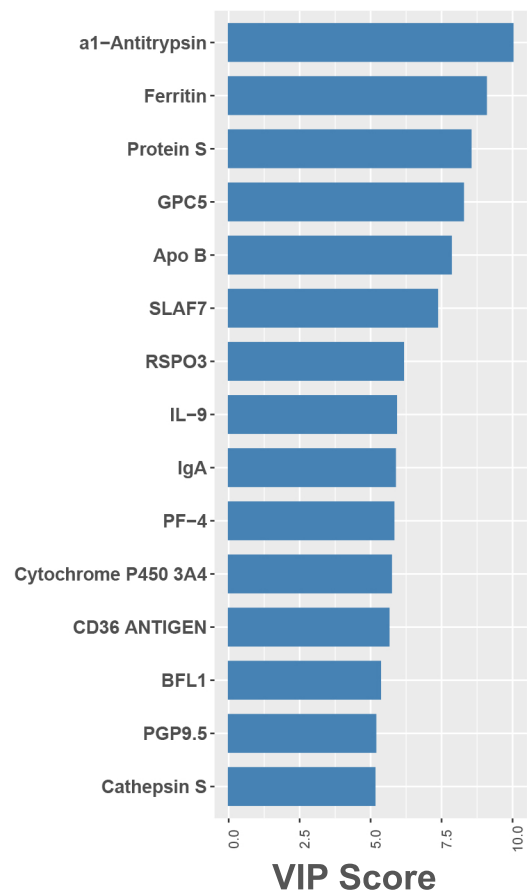**b**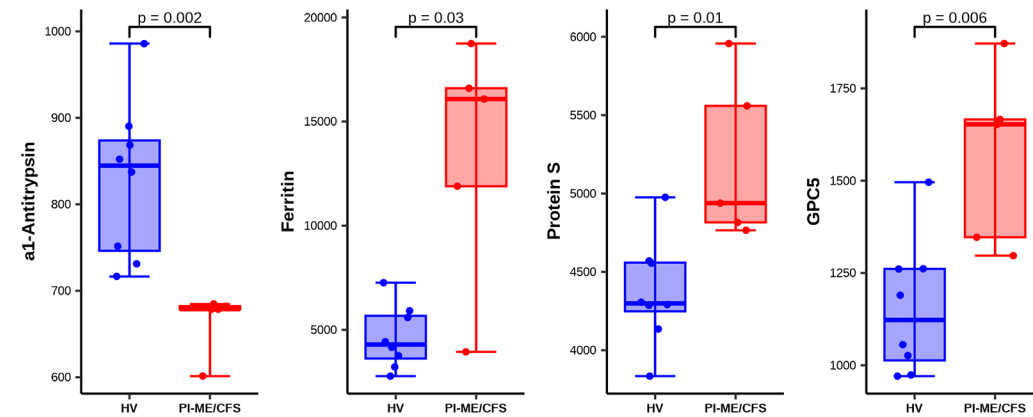**c**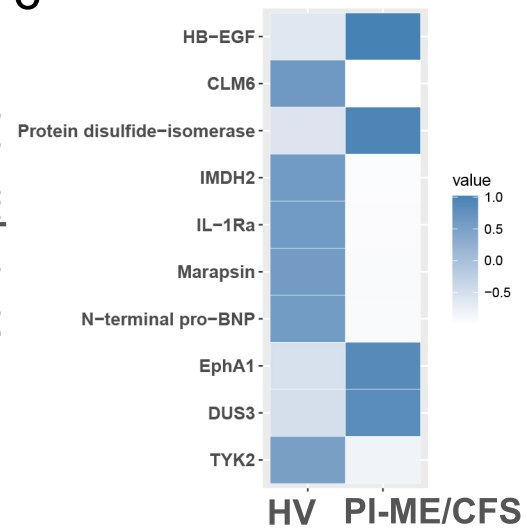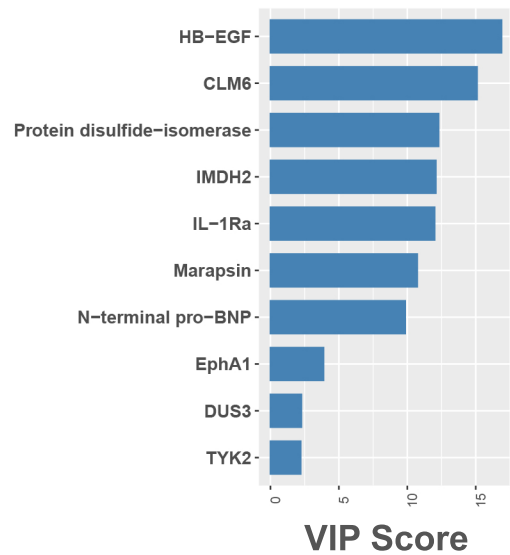**d**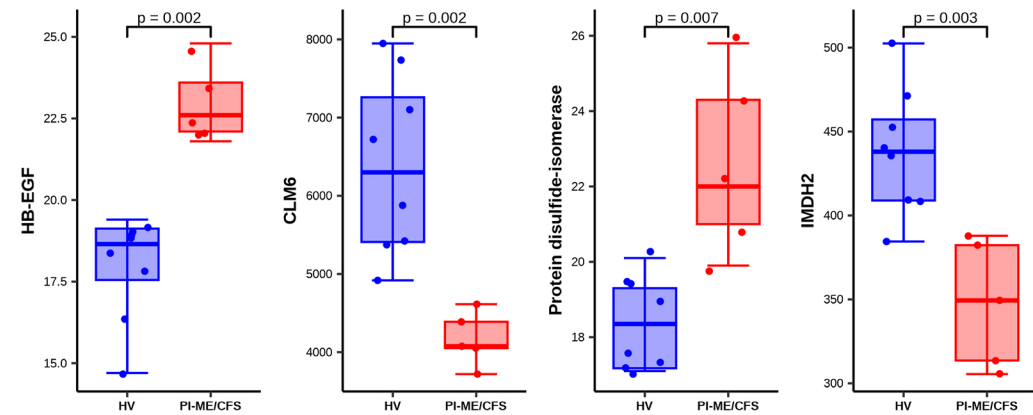

Figure S15: Multivariate and univariate analysis of the soma protein aptamers measured in the serum and cerebrospinal fluid (CSF) samples of male HV and PI-ME/CFS cohorts.

A Heatmaps of the average scaled expression values for the top15 indicated serum soma protein aptamers on y axis and the variable importance in prediction (VIP) scores of soma protein aptamers in the male cohort. B Expression box plots of the top 4 VIP protein aptamers for male cohort [HV (blue; n = 8 independent male participants) and PI-ME/CFS (red; n = 6 independent male participants)] in serum. C. The heatmap of the average scaled expression values for the top15 indicated cerebrospinal fluid soma protein aptamers on y axis and the variable importance in prediction (VIP) scores of indicated soma protein aptamers in the male cohort. D. Expression box plots of the top 4 VIP protein aptamers for male cohort [HV (blue; n = 8 independent male participants) and PI-ME/CFS (red; n = 6 independent male participants)] in cerebrospinal fluid. For box plots b and d, boxes depict the median (horizontal line) within quartiles 1–3 (bounds of box). Whiskers extend to minimum and maximum values. Exact p-values are from unadjusted Mann-Whitney U tests. No aptamer was significant after FDR-correction. Source data are provided as a Source Data file.

a

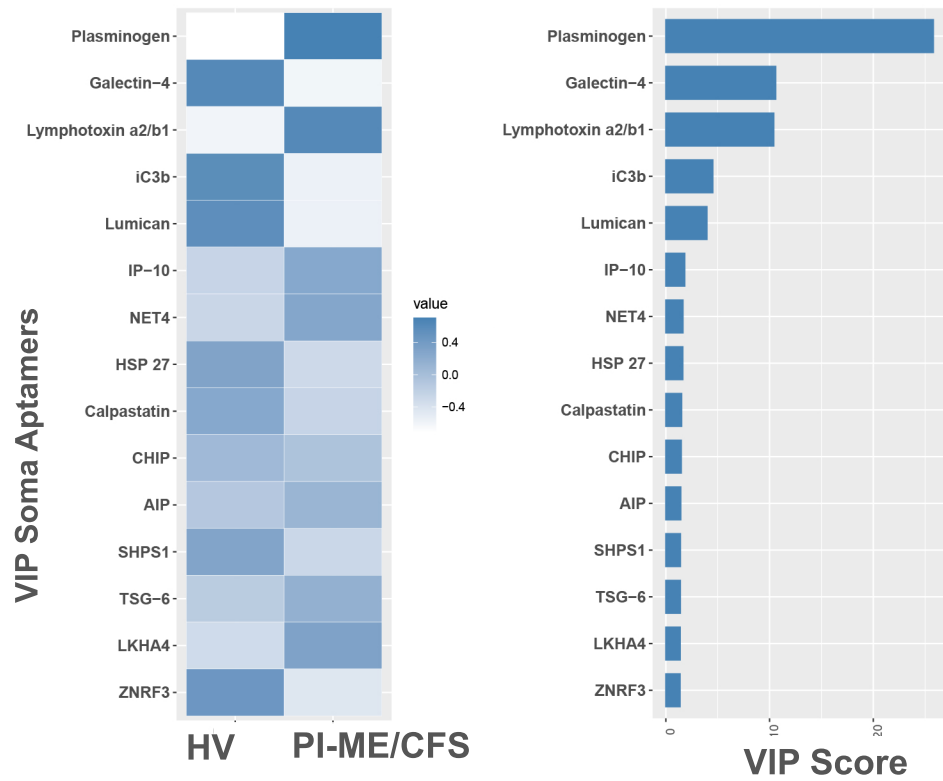

b

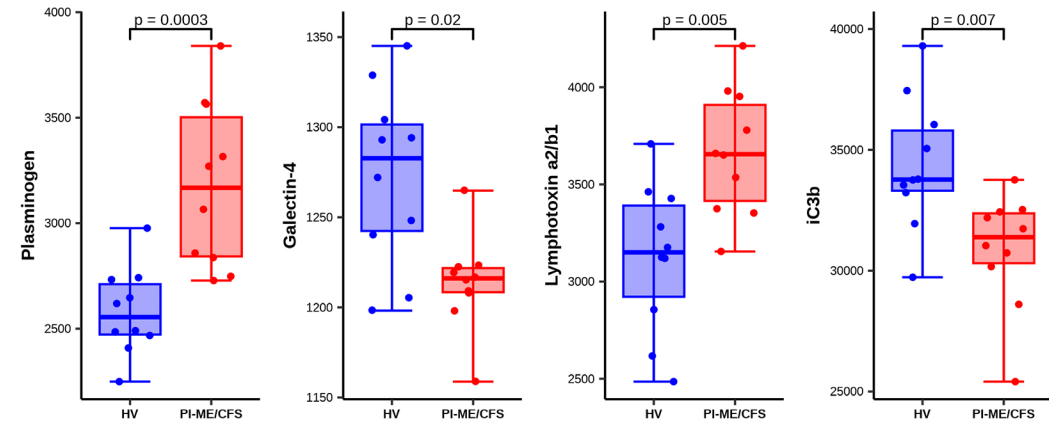

c

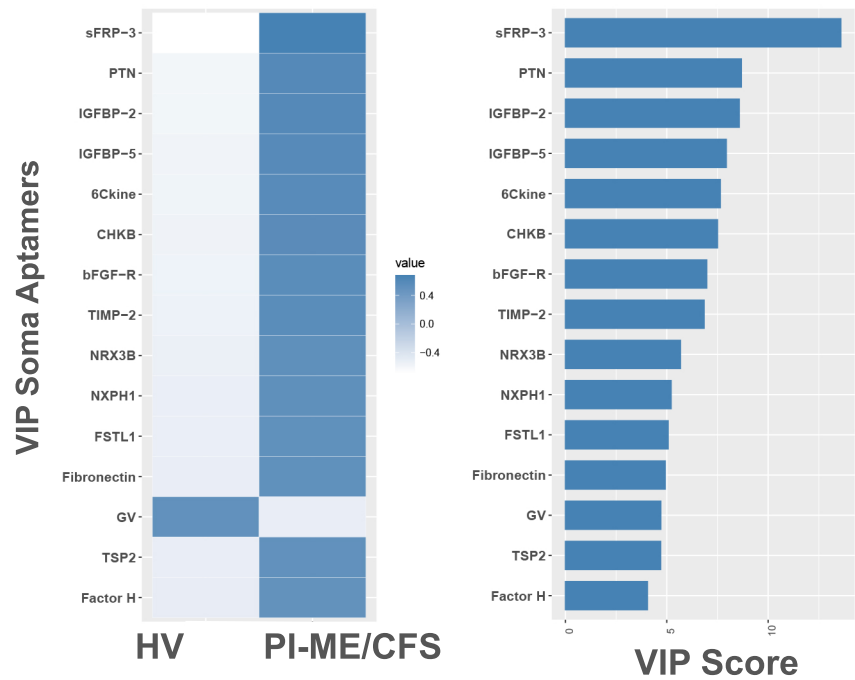

d

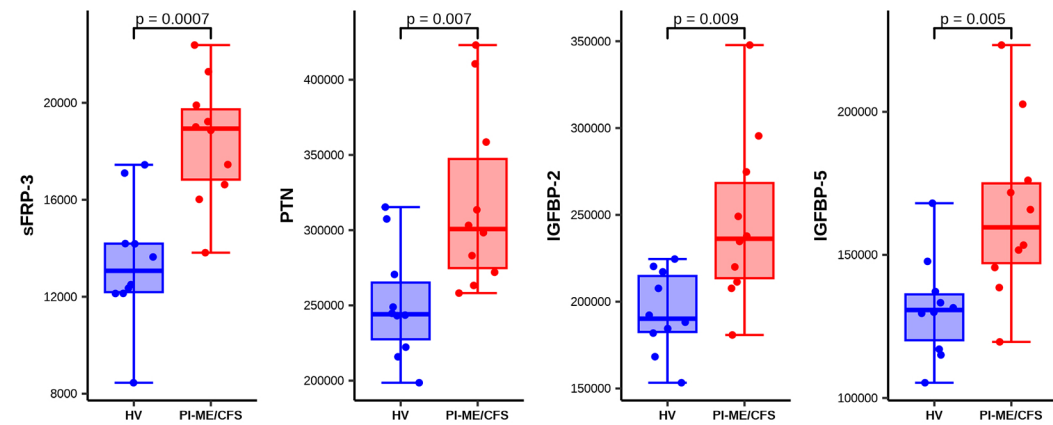

Figure S16: Multivariate and univariate analysis of the soma protein aptamers measured in the serum and cerebrospinal fluid (CSF) samples of female HV and PI-ME/CFS cohorts.

A. Heatmaps of the average scaled expression values for the top15 indicated serum soma protein aptamers on y axis and the variable importance in prediction (VIP) scores of soma protein aptamers in the female cohort. B. Expression box plots of the top 4 VIP protein aptamers for female cohort HV [(blue; n = 10 independent female participants) and PI-ME/CFS (red; n = 9 independent female participants)]. C. The heatmap of the average scaled expression values for the top15 indicated cerebrospinal fluid soma protein aptamers on y axis and the variable importance in prediction (VIP) scores of indicated soma protein aptamers in the female cohort. D. Expression box plots of the top 4 VIP protein aptamers for the female cohort [(H; HV (blue; n = 10 independent female participants) and PI-ME/CFS (red; n = 9 independent female participants)]. For box plots b and d, boxes depict the median (horizontal line) within quartiles 1–3 (bounds of box). Whiskers extend to minimum and maximum values. Exact p-values are from unadjusted Mann-Whitney U tests. No aptamer was significant after FDR-correction. Source data are provided as a Source Data file.



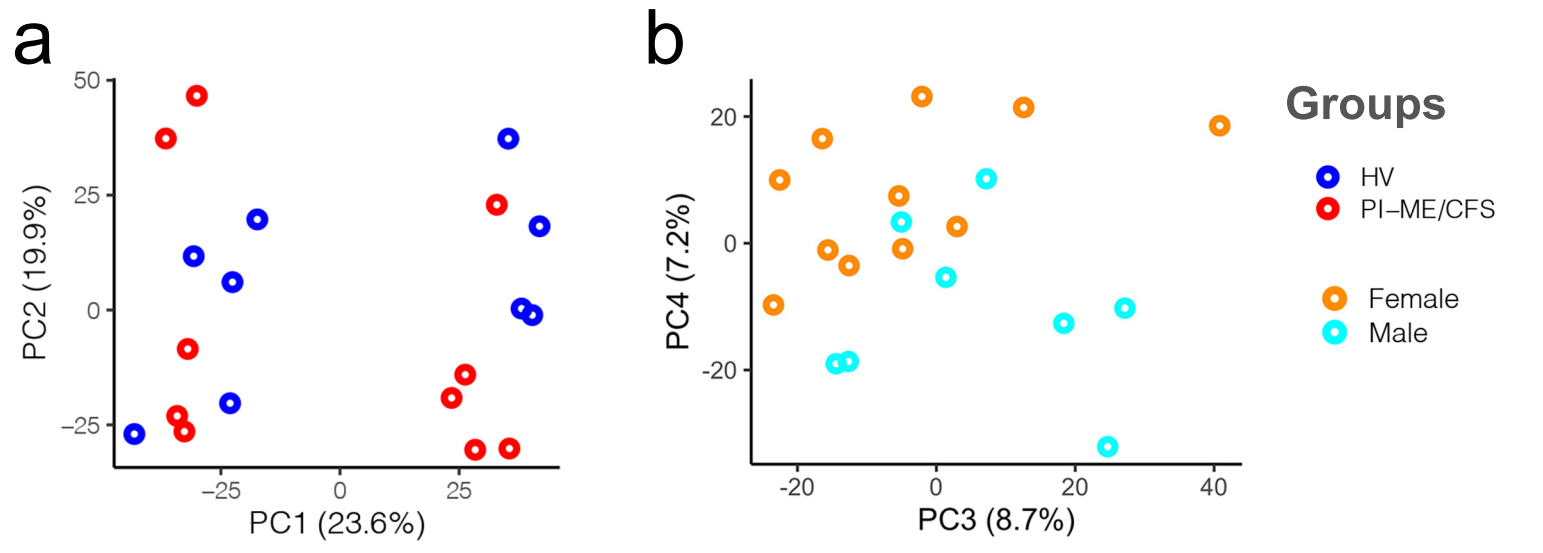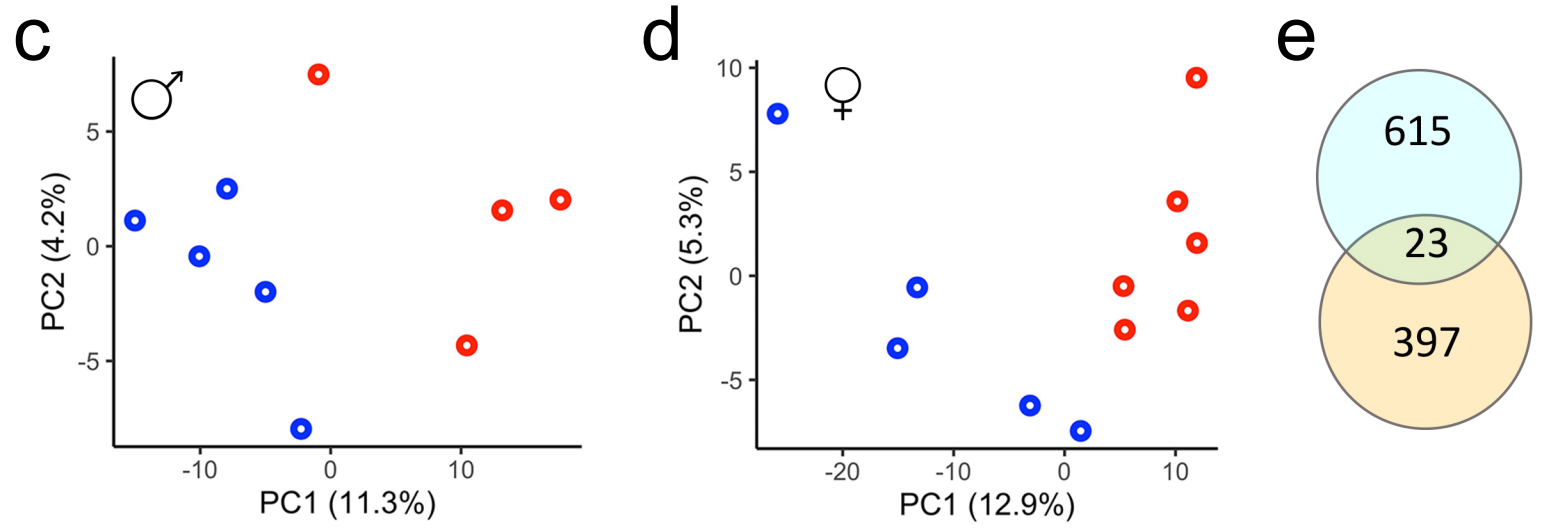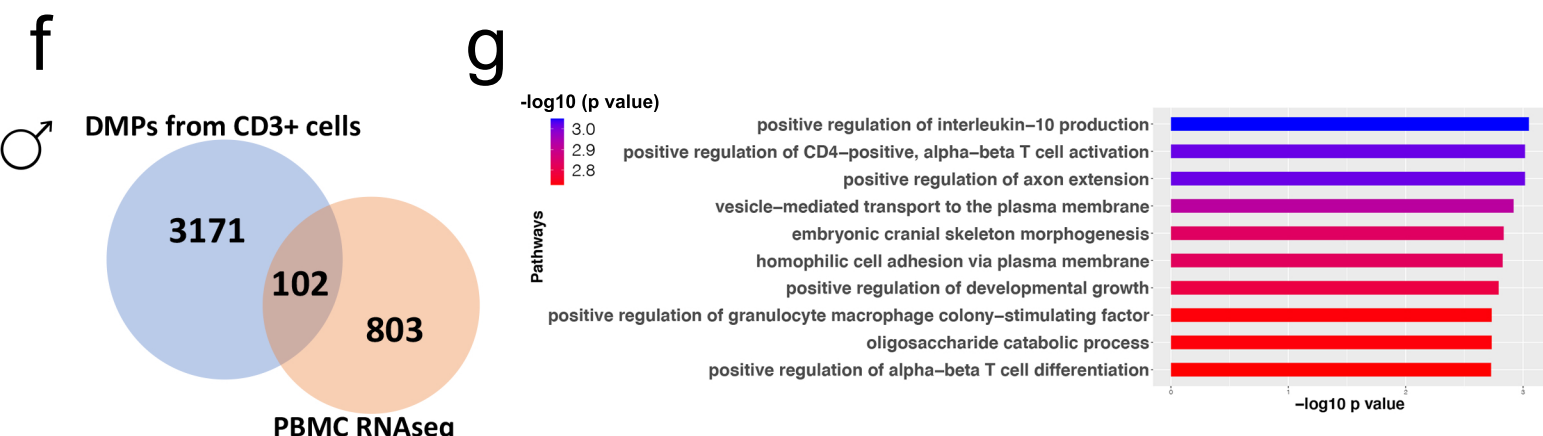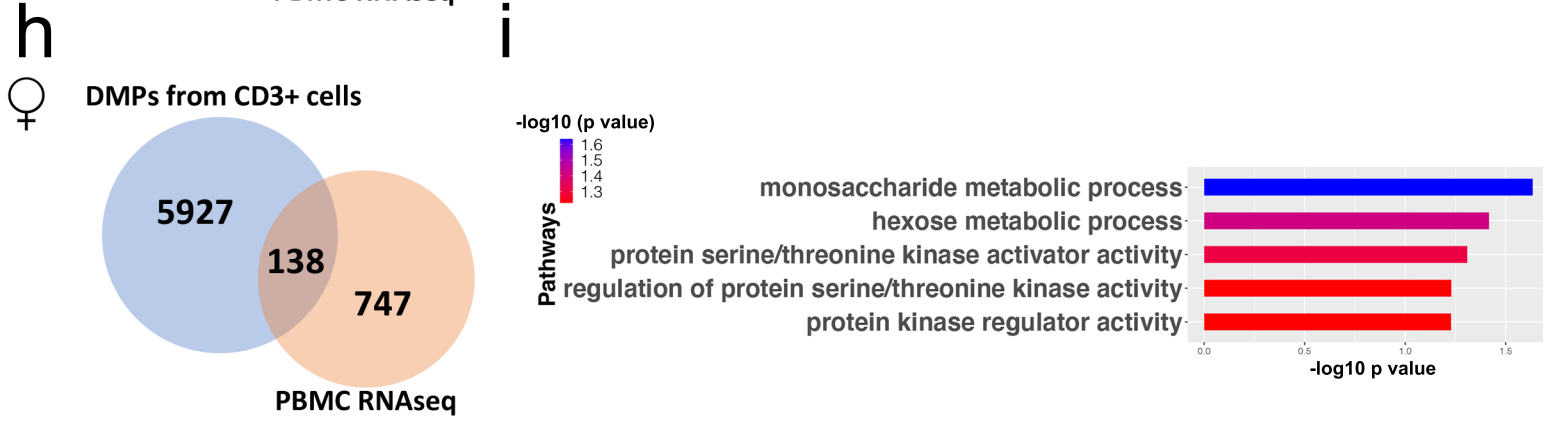

Figure S17: Analysis of external chronic fatigue syndrome RNAseq and methylation datasets showed distinct subset of genes are perturbed in male and female cohorts.

A-B. PCA computed from all gene expression values measured in the monocytes with indicated groups: HV (blue; n = 9 independent participants) and PI-ME/CFS (red; n = 10 independent participants) or males (turquoise; n = 8 independent participants) and females (orange; n = 11 independent participants) highlighted for the indicated PCs. C-D. PCA computed from DE gene expression values in (C) male (HV blue; n = 5 independent participants and PI-ME/CFS (red; n = 4 independent participants) and (D) female cohorts (HV blue; n = 5 independent participants and PI-ME/CFS (red; n = 6 independent participants). E. Venn diagram showing common DE genes identified from male and female cohorts (DE genes are genes with p value <0.05). F. Venn diagram showing overlap between differentially methylated genes identified in CD3+ cells of female CFS cohorts that were identified as DE genes from the PBMC samples of male cohorts analyzed in this study. G. Pathway enrichment analysis of genes commonly perturbed in the methylation profiling and gene expression profiling in male cohorts. H. Venn diagram showing overlap between differentially methylated genes identified in CD3+ cells of female CFS cohorts that were also DE genes from the PBMC samples analyzed in the female cohorts of this study. I. Pathway enrichment analysis of genes commonly perturbed in the methylation profiling and gene expression profiling in female cohort. DE: differentially expressed; PBMC: peripheral blood mononuclear cells; PC: principal component. Source data are provided as a Source Data file.

**a**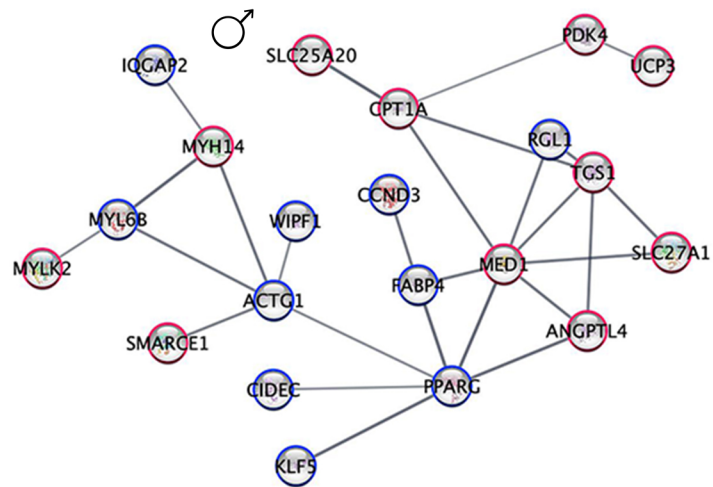**b**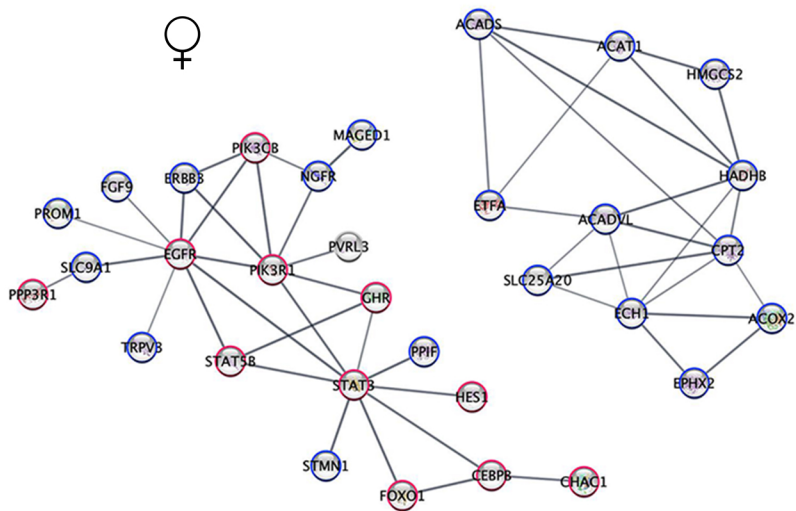

Figure S18: Male and female cohorts have distinct differential gene expression profiles in the muscle: A-B. Protein-Protein interactome of a subset of DE genes from (A) male and (B) female cohorts and the fold change information are overlaid on the nodes. Red color indicates upregulation and blue color indicated downregulation in PI-ME/CFS group compared to healthy group. Source data are provided as a Source Data file.

**a**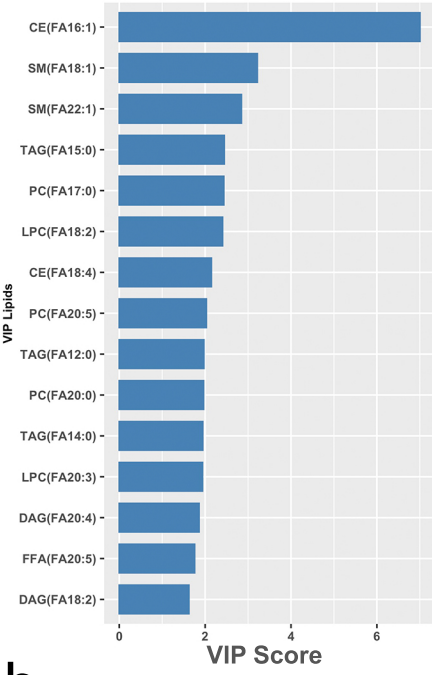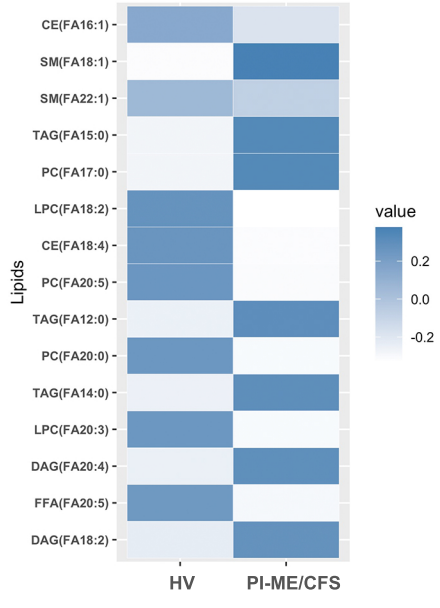**b**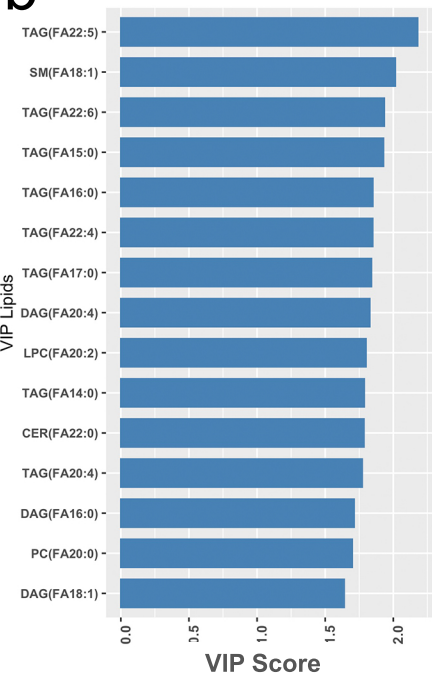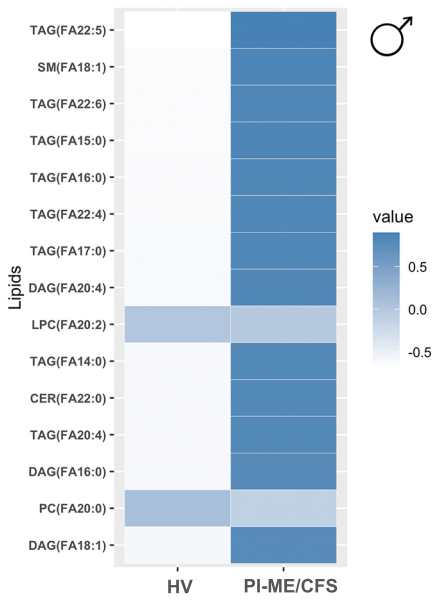**c**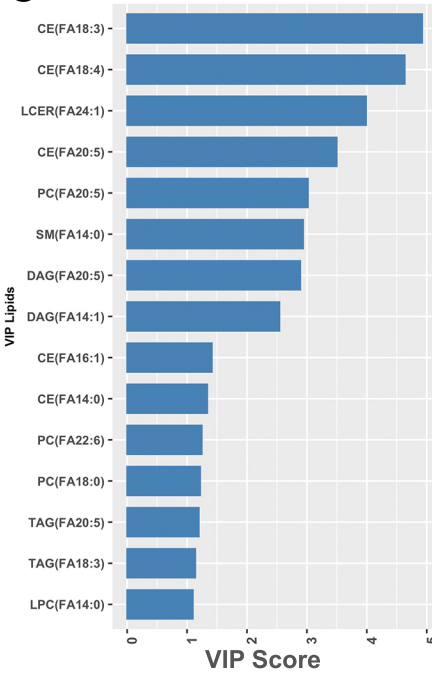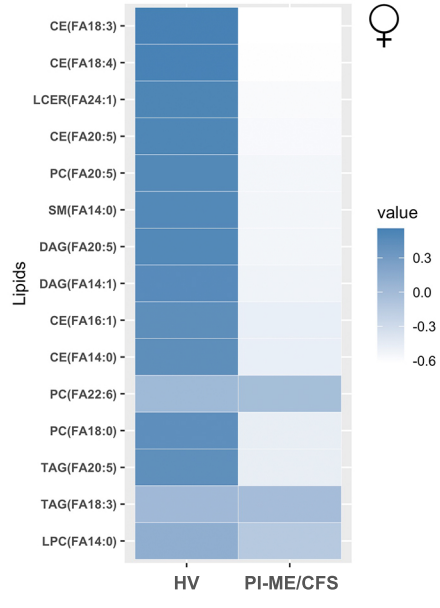

Figure S19: Multivariate analysis of serum lipidomics data:

A. Variable importance in prediction (VIP) scores of lipids with VIP score  $>1$  and heatmap of the average scaled expression values of the indicated VIP metabolites in all samples. B. Variable importance in prediction (VIP) scores of lipids with VIP score  $>1$  and heatmap of the average scaled expression values of the indicated VIP metabolites in the male cohort. C. Variable importance in prediction (VIP) scores of lipids with VIP score  $>1$  and heatmap of the average scaled expression values of the indicated VIP metabolites in the female cohort. Source data are provided as a Source Data file.

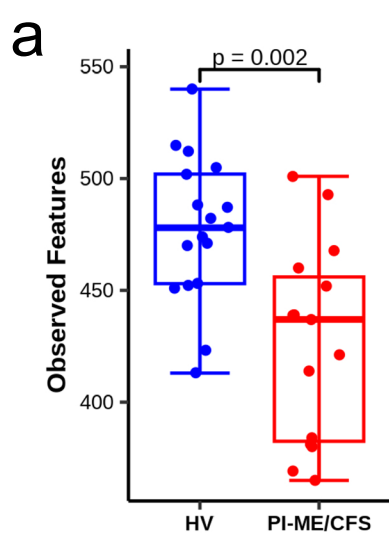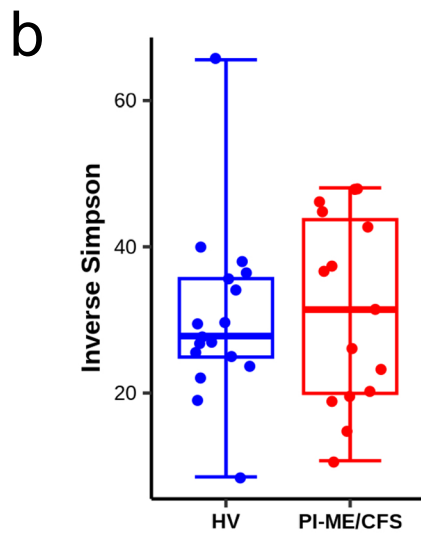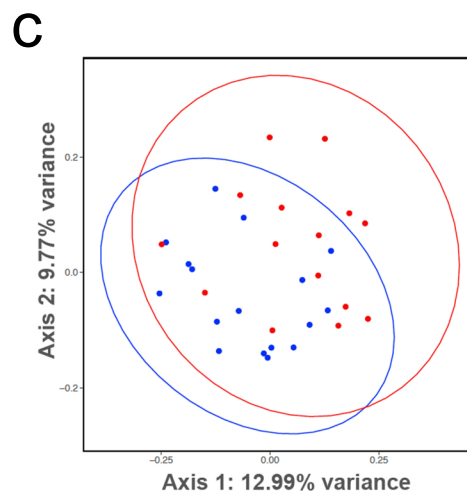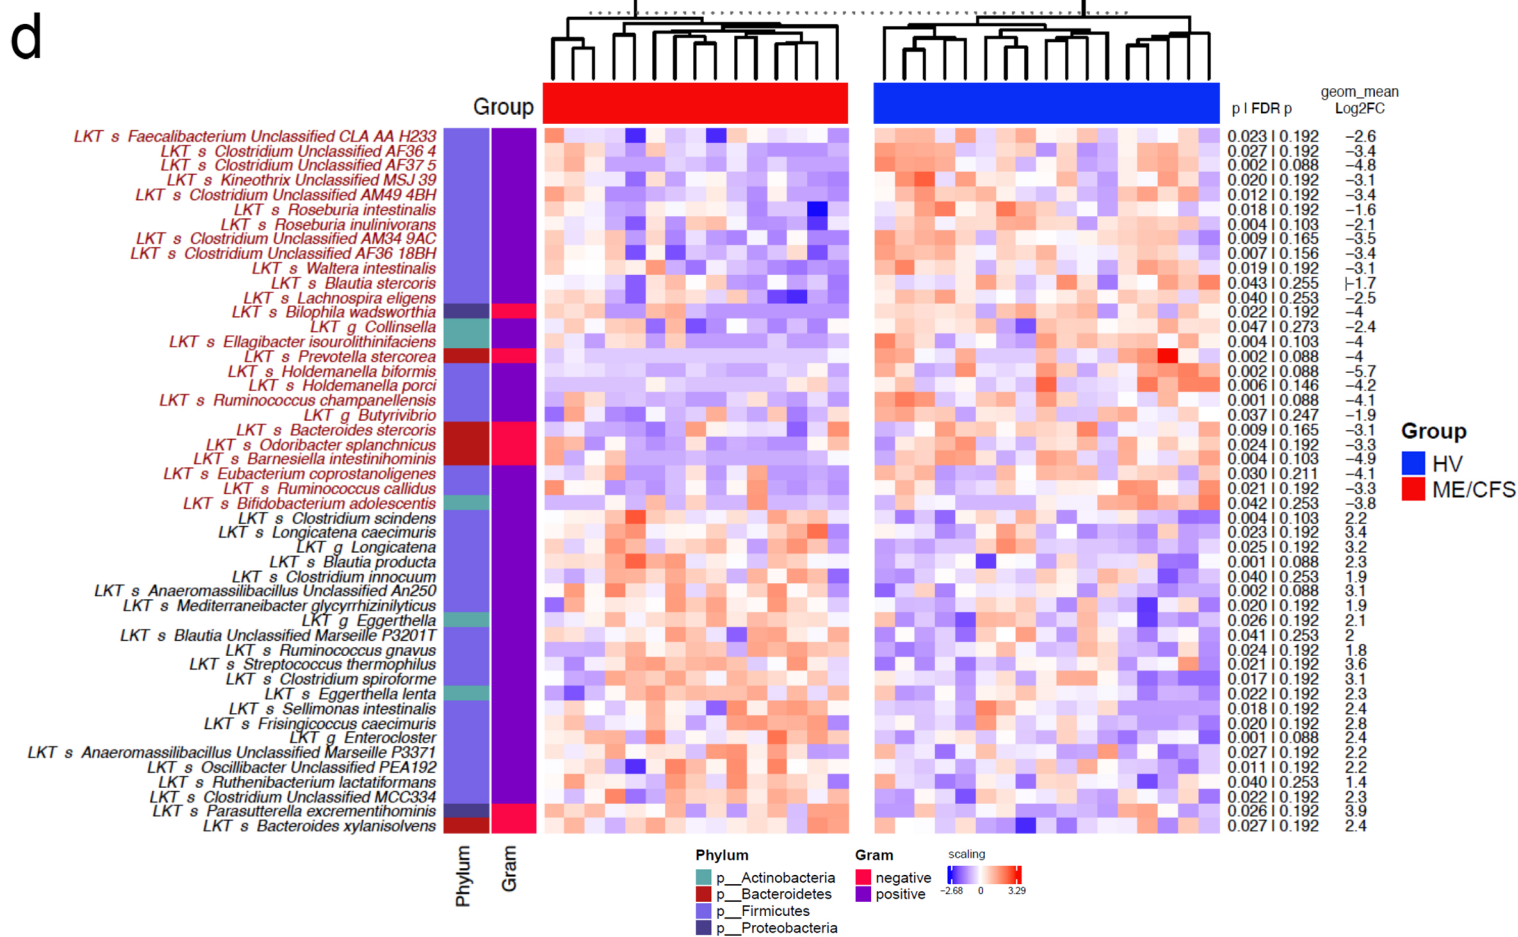

Figure S20: Measurements of microbial composition using shotgun metagenomics:  
A-B. Boxplots of the Alpha diversity of stool samples as measured by (A) number of observed species-level taxa between the HV (blue; n = 17 independent participants) and PI-ME/CFS (red; n = 15 independent participants) groups using a unadjusted two-sided t-test for independent samples with equal variance ( $p = 0.002$ ) and (B) Inverse Simpson Index. For box plots a-b boxes depict the median (horizontal line) within quartiles 1–3 (bounds of box). Whiskers extend to minimum and maximum values. C. Beta diversity of stool samples at the species-level as shown by Principal Coordinate Analysis (PCoA) of Bray-Curtis dissimilarity. D. Scaled relative abundance heatmap of the species-level taxa responsible for the differences in diversity between the HV (blue; n = 18 independent participants) and PI-ME/CFS (red; n = 15 independent participants) groups. P-values were calculated using the Mann-Whitney U test. Adjusted p-values were obtained by False Discovery Rate (FDR) adjustment. Log<sub>2</sub> fold changes were calculated using the geometric mean relative abundance of each feature in each group. Only features with a raw p-value  $\leq 0.05$  are shown, and with a minimum log<sub>2</sub> foldchange of 1. Source data are provided as a Source Data file.



1 **SUPPLEMENTARY RESULTS**

2

3 **Stringent Study Recruitment Process identified Individuals with post-infectious Myalgic**  
4 **encephalomyelitis/chronic fatigue syndrome (PI-ME/CFS)**

5 A stringent recruitment process reduced PI-ME/CFS case heterogeneity. Study recruitment took  
6 place between December 2016 and February 2020 (Figure 1A). Inclusion and exclusion criteria  
7 are listed in Data S1. A total of 484 inquiries for participation were made. The majority of these  
8 were self-referrals. Of these, 267 persons were screened out during the initial telephone  
9 screening interview (Data S2A). A total of 217 persons underwent a medical record review and  
10 a telephone interview by a study physician. Of those, 146 were excluded after review (Data  
11 S2B) and 44 persons did not complete the review process prior to closing recruitment due to  
12 the pandemic.

13

14 A total of 27 PI-ME/CFS participants underwent research evaluation at the National Institutes of  
15 Health (NIH) Clinical Center. Two participants withdrew after providing informed consent and  
16 completing a history and physical exam without undergoing any research investigations. Of the  
17 remaining 25 PI-ME/CFS participants, four were found to have previously undiagnosed medical  
18 conditions that were related to ME/CFS symptoms. This included one case each of desmoplastic  
19 small round cell tumor, atypical inflammatory myositis, primary biliary cholangitis, and  
20 parkinsonism. Of the remaining 21 PI-ME/CFS participants, four participants were determined  
21 not to have a demonstrable infectious association to their ME/CFS symptoms during the case  
22 adjudication process (Data S2C). A total of 17 adjudicated PI-ME/CFS participants completed  
23 the initial deep phenotyping measurements; eight of these participants also completed the  
24 exercise stress measurements.

25

26 **PI-ME/CFS participants had a variety of well documented infections that precipitated the**  
27 **illness**

28 These included 10 cases of mixed upper respiratory tract infections (eight pharyngitis, two  
29 sinusitis, two bronchitis and two otitis), three cases of acute Epstein-Barr Virus infection, one  
30 case of gastroenteritis, one case of atypical hepatitis, one case of herpes zoster ophthalmicus,  
31 and one case of Ramsay Hunt syndrome due to herpes zoster. The time lapse between infection  
32 onset and research evaluation ranged between 13 to 59 months (33 ± 15 months).

33

34 **All individuals met criteria used for diagnosis of ME/CFS**

35 All PI-ME/CFS participants met at least one published ME/CFS criterion. 14 met the 1994  
36 Fukuda Criteria, nine met the 2003 Canadian Consensus Criteria, and all 17 met the 2015  
37 Institute of Medicine Criteria (Data S2D).

38

39 **Healthy Volunteers were thoroughly screened for underlying illnesses**

40 A total of 25 healthy volunteers (HVs) were recruited to serve as comparator participants. Of  
41 these, one participant withdrew prior to completing deep phenotyping measurements. Three  
42 participants were excluded after evaluation related to asymptomatic medical conditions that  
43 were identified. One had leukodystrophy, another had pleocytosis in the cerebrospinal fluid,  
44 and the third had early onset dementia. A total of 21 healthy volunteer comparators completed

45 the initial deep phenotyping measurements; nine of these comparators also completed the  
46 exercise stress measurements.

47

#### 48 **Healthy Volunteers were carefully matched to the PI-ME/CFS individuals**

49 Recruited PI-ME/CFS cases and HV comparators were matched on demographic characteristics.  
50 The demographic characteristics of the HV and PI-ME/CFS participants are detailed in Figures  
51 1B-C and Data S5. Participants were matched with regards to age ( $42 \pm 13$  versus  $38 \pm 15$  years),  
52 body mass index ( $25.8 \pm 3.4$  versus  $25.9 \pm 5.3$  kg/m<sup>2</sup>) and sex (10 versus 6 men; 12 versus 11  
53 women). The HV group consisted of three multiracial participants, of which one was Hispanic,  
54 and 18 White participants. The PI-ME/CFS group consisted of two Asians and 15 White  
55 participants, of which two were Hispanic. All participants except for one HV had a high school  
56 diploma or higher education. Thirteen PI-ME/CFS participants were on long-term disability  
57 while none of the HVs were disabled.

58

#### 59 **Characteristics of Individuals who Underwent a Second Study Visit**

60 All participants were invited to return for a second study visit to measure exercise response.  
61 Eight PI-ME/CFS and nine HVs were able to return for participation prior to the study being  
62 closed due to the SARS-CoV-2 pandemic. The PI-ME/CFS participants (age:  $42 \pm 13$  years, female:  
63 50%, BMI:  $26.7 \pm 5.0$ ) were older and more often male than those that could not participate  
64 (age:  $34.5 \pm 13.8$  years, female %: 78%, BMI:  $24.8 \pm 5.4$ ).

65

#### 66 **The Participants did not have a Significant History of Use of Drugs of Abuse**

67 None of the PI-ME/CFS participants ever used tobacco products while three HVs were former  
68 tobacco users and two occasionally used tobacco products socially. Cannabis products were  
69 used occasionally by one PI-ME/CFS and one HV. None of the participants were using or abusing  
70 illicit drugs or alcohol at the time of evaluation.

71

#### 72 **The Participants had Valid Performances on Neurocognitive Testing**

73 The Word Memory Test (WMT), the B Test, and the Dot Test were administered as part of the  
74 neuropsychological testing battery (Data S6). Of the 18 HVs tested, two failed a validity test,  
75 none failed more than one validity test, and none failed the WMT. Of the 15 PI-ME/CFS  
76 participants tested, one failed a validity test, none failed more than one validity test, and none  
77 failed either the WMT or B test. No participants had an invalid performance profile on the Test  
78 of Variables of Attention (TOVA). Thus, PI-ME/CFS and HV participants had equally valid  
79 performances on neurocognitive testing.

80

#### 81 **Physical Symptoms were common in PI-ME/CFS**

82 PI-ME/CFS participants reported magnitudes of physical symptoms more than HVs (Figure 1C;  
83 Data S7). This was seen with the SF-36 Physical Component Score (PCS), which was more than  
84 2.5 standard deviations lower in PI-ME/CFS participants compared to both the HVs and US  
85 population norms ( $56.7 \pm 3.1$  versus  $23.5 \pm 10.0$ ,  $p=0.0000000007$ ). Thus, PI-ME/CFS had more  
86 physical symptoms, in both number and severity, than HV participants.

87

#### 88 **Fatigue was a prominent complaint of PI-ME/CFS participants**

89 Fatigue was similarly worse (on the magnitude of two to three standard deviations) for PI-  
90 ME/CFS participants on the Brief Fatigue Inventory ( $1.7 \pm 2.4$  versus  $16.9 \pm 4.9$ ,  $p=0.0000003$ ),  
91 PROMIS fatigue ( $56.5 \pm 8.7$  versus  $66.4 \pm 4.7$ ,  $p=0.000002$ ), and all Multidimensional Fatigue  
92 Inventory subscales (all  $p \leq 0.0001$ ). The qualitative experience of this level of fatigue is evoked  
93 in this participant description: "...I call it Groundhog Day, except it's not a good day ... You wake  
94 up feeling like you already ran a marathon. [That's] how I start every day. [So] every day is [like]  
95 how do I get through it? How do I do the basic things like go to the bathroom by myself or  
96 shower by myself. Or maybe this day I'm not going to shower because I just feel too terrible."  
97

### 98 **PI-ME/CFS Individuals had Multiple types of Pain**

99 PI-ME/CFS participants reported more clinically substantial pain (Data S7) on PROMIS Pain  
100 Behavior ( $38.6 \pm 8.4$  versus  $53.3 \pm 9.8$ ,  $p=0.00007$ ), PROMIS Pain Interference ( $42.4 \pm 3.6$  versus  
101  $58.9 \pm 11.3$ ,  $p=0.00004$ ), PROMIS Pain Intensity ( $39.7 \pm 5.7$  versus  $56.2 \pm 12.4$ ,  $p=0.00005$ ),  
102 Polysymptomatic Distress Scale ( $1.6 \pm 1.6$  versus  $13.2 \pm 7.2$ ,  $p=0.0000002$ ), the McGill Pain  
103 Questionnaire ( $1.0 \pm 3.5$  versus  $19.9 \pm 16.0$ ,  $p=0.00003$ ), and tender point counts ( $1 \pm 1.6$  versus  
104  $5.2 \pm 4.3$ ,  $p=0.0002$ ). Two PI-ME/CFS participants met 1990 American College of Rheumatology  
105 (ACR) fibromyalgia criteria and seven met modified 2010 ACR fibromyalgia criteria. The  
106 qualitative experience of PI-ME/CFS pain is evoked in this participant description: "I think the  
107 pain is what drives me batty because there's so many different kinds of pain. They fluctuate...  
108 The nerve pain [is] all over. [There is] Stomach pain. The headaches [are] a fact of life. Torso  
109 pain is kind of a spinoff of that, [and] muscle pain."  
110

111 PI-ME/CFS participants complained of significantly more neuropathic symptoms than HVs, with  
112 significantly increased scores on the Neuropathic Pain Scale Overall Unpleasantness ( $0.6 \pm 1.7$   
113 versus  $5.1 \pm 3.4$ ,  $p=0.000008$ ), Deep Severity ( $0.5 \pm 1.6$  versus  $5.6 \pm 3.5$ ,  $p=0.00001$ ), and Surface  
114 Severity ( $0.2 \pm 0.7$  versus  $2.6 \pm 2.5$ ,  $p=0.0001$ ) scores (Data S7). The qualitative experience of this  
115 level of neuropathic sensations is evoked in this participant description: "I get cramps, and this  
116 burning, electrical, stinging sensation. It's not pleasant. [It] goes through my body in other  
117 forms but my legs are the worst."  
118

### 119 **PI-ME/CFS Individuals had Multiple types of Motor Symptoms**

120 PI-ME/CFS participants frequently reported motor symptoms (14.3% versus 70.6%), including  
121 weakness (9.5% versus 82.4%), difficulty initiating movements (0% versus 29.4%), paralysis (0%  
122 versus 11.8%), tremors (9.5% versus 23.5%), dystonia (4.7% versus 23.5%), dysarthria (0%  
123 versus 23.5%) and gait/balance problems (4.7% versus 41.2%). Weakness severity, as measured  
124 by weakness Visual Analogue Scale (VAS), was greater in PI-ME/CFS participants ( $3.9 \pm 6.8$   
125 versus  $27.3 \pm 26.7$ ,  $p=0.02$ ). The qualitative of experiences of weakness is evoked in this  
126 participant description: "It's muscle pain and weakness. [After] each setback... my muscles get  
127 wimpier and wimpier. [If] I'm totally relaxed, it feels like my muscles are pureed. [If] I try to do  
128 anything, they cramp up like you've been gripping something too long...". Other types of motor  
129 symptoms are also described: "The shaking is annoying... When I feel that first twinge [of back  
130 pain], I lie down... and I can stop [what is coming] which will be dragging feet, my head hanging  
131 forward, the shakes, and difficulty in projecting my voice."  
132

133 **General Physical Examination was unrevealing in PI-ME/CFS**

134 There were few clinically substantial findings on physical examination for both PI-ME/CFS and  
135 HVs. Two PI-ME/CFS participants and none of the HVs met Beighton criteria for hypermobility.  
136 One PI-ME/CFS participant had a myofascial pain disorder of the rectus abdominus muscles.  
137 One PI-ME/CFS participant had tinea corporis that resolved with therapy. No preauricular,  
138 anterior cervical, posterior cervical, supraclavicular, submandibular, axillary, epitrochlear,  
139 inguinal, or popliteal lymphadenopathy was noted in any of the participants.

140

141 **Neurological Examination was unrevealing in PI-ME/CFS**

142 Three PI-ME/CFS participants had abnormalities on neurological examination. One PI-ME/CFS  
143 participant had findings consistent with a small fiber peripheral neuropathy confirmed by a  
144 QSART test (however, intraepidermal nerve fiber and sweat gland nerve fiber density measures  
145 were normal). Another had residual facial weakness from Ramsay-Hunt syndrome. A third had a  
146 clinical history suggestive of an untreated migraine disorder. All HVs had normal neurological  
147 examinations.

148

149 **Magnetic Resonance Imaging of Brain showed Non-Specific Findings**

150 There were few abnormalities noted on brain magnetic resonance imaging (MRI). No structural  
151 abnormalities were noted except for incidental findings of non-specific punctate white matter  
152 lesions in five HV and five PI-ME/CFS participants. Three HVs were noted to have mild cerebral  
153 atrophy and one HV had an asymptomatic displaced disc at C2-C3. One PI-ME/CFS participant  
154 did not undergo MRI due to presence of an intrauterine device.

155

156 **Nerve Fiber Densities in Skin were Normal**

157 A subset of HV (n=9) and PI-ME/CFS participants (n=11) underwent skin biopsies for assessment  
158 of epidermal and sweat gland nerve fiber densities. No group differences were noted in  
159 intraepithelial nerve fiber density of the distal leg (Figure S1A) or distal thigh (Figure S1B). No  
160 group differences were noted in sweat gland nerve fiber density of the distal leg (Figure S1C) or  
161 distal thigh (Figure S1D). No PI-ME/CFS participants were below the normative values of small  
162 fiber density for age and gender<sup>1</sup>.

163

164 **Biomarkers of Neuronal Injury were Not Elevated in PI-ME-CFS**

165 Plasma and cerebrospinal fluid samples were measured for markers of neuronal injury. No  
166 group differences were noted in plasma for tau (Figure S1E), neurofilament light chain (NfL;  
167 Figure S1F), or glial fibrillary acidic protein (GFAP; Figure S1G). Plasma ubiquitin carboxyl-  
168 terminal esterase L1 (UCHL1) are not reported as 38% of the cohort had CV values greater than  
169 20%. No group differences were noted in cerebrospinal fluid for tau (Figure S1H), NfL (Figure  
170 S1I), GFAP (Figure S1J) or UCHL1 (Figure S1K).

171

172 **Detailed Clinical Laboratory Evaluation was Unrevealing in PI-ME/CFS**

173 There were few clinically relevant findings on clinical laboratory evaluation. A large panel of  
174 parameters were tested in blood and urine that included hematology, chemistry,  
175 endocrinology, immunology, virology, and heavy metal panels (Data S8, S9). There were no  
176 group differences in any laboratory parameter except for Mean Corpuscular Volume (MCV: 90.0

177  $\pm 3.6$  versus  $87.8 \pm 2.7$  fL,  $p=0.04$ ) and Mean Corpuscular Hemoglobin (MCH:  $30.2 \pm 1.0$  versus  
178  $29.3 \pm 1.5$  pg,  $p=0.05$ ). No participants had low levels of iron, transferrin, or transferrin  
179 saturation. Three PI-ME/CFS participants had low and seven had high ferritin levels. No group  
180 differences were observed in iron levels in cerebrospinal fluid by inductively coupled plasma-  
181 mass spectroscopy ( $46404.4 \pm 19425.0$  versus  $48700.1 \pm 21886.1$  parts per trillion,  $p=0.7$ ).

182  
183 No individual participants had clinical abnormalities in blood chemistries, blood cell counts,  
184 creatinine clearance, or glucose metabolism. Fasting lipid measures were elevated in six HV and  
185 seven PI-ME/CFS participants. No participants had Vitamin B12 or D deficiency and two  
186 participants from each group had low folate levels. No participants had evidence of active  
187 Epstein-Barr Virus (EBV) or Cytomegalovirus (PCR), Lyme disease (C6 peptide), syphilis (Enzyme  
188 immune assay), Hepatitis B or C, or HIV (antibody testing). All participants had IgG antibodies to  
189 EBV capsid antigen. All participants were negative for IgM antibodies to EBV capsid antigen  
190 except for one PI-ME/CFS participant with an equivocal result. All participants had EBV nuclear  
191 antigen antibodies except for one HV. No PI-ME/CFS participants had overt evidence of mast  
192 cell disease as measured by total serum tryptase. No participants had evidence of heavy metal  
193 toxicity as measured by 24-hour urine assay.

194  
195 There were few laboratory abnormalities noted in the participants. One PI-ME/CFS participant  
196 was found to have asymptomatic duloxetine-induced hepatotoxicity that normalized with  
197 treatment cessation. One HV had mildly abnormal liver function tests related to non-alcoholic  
198 fatty liver disease. Four PI-ME/CFS participants had a positive ANA without other signs of  
199 autoimmune or rheumatic disease compared to one HV. Two PI-ME/CFS participants had  
200 thyroid autoantibodies (one thyroid peroxidase and one anti-thyroglobulin antibody) in the  
201 setting of normal thyroid stimulating hormone (TSH) and triiodothyronine levels. Two PI-  
202 ME/CFS participants had mild normocytic anemia, one in the setting of elevated inflammatory  
203 parameters (CRP 7.9, ESR 48, normal ferritin, normal platelets) and the other in the setting of  
204 subclinical autoimmunity (Positive ANA and thyroid peroxidase, low ferritin, normal CRP and  
205 ESR). One PI-ME/CFS participant had asymptomatic leukopenia. One PI-ME/CFS participant had  
206 a positive urine test for non-toxic arsenobetaine. One HV had urine leukocytosis of unclear  
207 origin.

208  
209 Cerebrospinal fluid cell counts, protein, glucose and IgG index were normal in both groups  
210 (Data S8). One healthy participant had *pattern 3* oligoclonal bands. Two PI-ME/CFS participants  
211 had *pattern 2* (both of the normocytic anemia participants) and two had *pattern 4* oligoclonal  
212 bands (one participant with duloxetine-induced hepatotoxicity).

#### 213 214 **Mood Disorders were Present in PI-ME-CFS**

215 PI-ME/CFS participants were more often depressed and anxious than HV participants but not  
216 severely so. Psychological impact on function was measured using the SF-36 Mental  
217 Component Score (MCS). Although the PI-ME/CFS group had lower MCS scores ( $54.8 \pm 3.7$   
218 versus  $49.1 \pm 6.8$ ,  $p=0.003$ ), they were equal to the average population norm.

219

220 Using the Beck Depression Inventory-II, five PI-ME/CFS participants had mild depression and  
221 one participant had moderate depression. Using the Beck Anxiety Inventory, three PI-ME/CFS  
222 participants had mild and three had moderate anxiety. PI-ME/CFS participants had significantly  
223 more self-reported depressive ( $2.1 \pm 3.4$  versus  $12.0 \pm 4.6$ ,  $p=0.000002$ ) and anxiety ( $1.9 \pm 2.0$   
224 versus  $7.8 \pm 7.4$ ,  $p=0.007$ ) symptoms.

225  
226 Somatization was evaluated with the Patient Health Questionnaire 15 (PHQ-15), with markedly  
227 increased scores in PI-ME/CFS participants ( $2.0 \pm 2.6$  versus  $11.6 \pm 4.6$ ,  $p < 0.0001$ ). Fatigue  
228 catastrophizing was greater in PI-ME/CFS participants ( $13.2 \pm 5.8$  versus  $21.1 \pm 6.9$ ,  $p < 0.0001$ ).

229  
230 Participants were also evaluated with the Structured Clinical Interview – DSM 5 (SCID-5). Three  
231 PI-ME/CFS participants had past depression predating the development of PI-ME/CFS, none had  
232 past anxiety, two had current depression, one had current anxiety, and two had subclinical  
233 anxiety. In comparison, three HVs had past depression, none had current depression, none had  
234 past anxiety, two had current anxiety, and two had subclinical anxiety. The lifetime exposure to  
235 trauma was similar in the groups (76.2% versus 70.6%,  $p=0.7$ ). One participant in each group  
236 met diagnostic criteria for Post-Traumatic Stress Disorder.

237  
238 PI-ME/CFS participants were also asked to describe their emotional states. Some descriptions,  
239 such as “I was like suddenly bed bound after being really active... I became so depressed that I  
240 couldn’t do everything that I wanted to do. [For a while] I just felt like giving up, like I wasn’t  
241 going to get better ever” place their mood in the context of adjustment to PI-ME/CFS. Others,  
242 such as “When I [crash ... when I’m not] feeling good, it’s hard to keep my emotional state  
243 stable because I [get really discouraged] or frustrated” place mood in the context of their  
244 function in the moment.

245

#### 246 **Use of Medications and Supplements was Common in PI-ME/CFS**

247 PI-ME/CFS participants used many more medications than HV participants. PI-ME/CFS  
248 participants were taking on average  $2.9 \pm 2.5$  medications and  $4.6 \pm 5.2$  supplements daily. Ten  
249 PI-ME/CFS participants were taking drugs with central nervous system activity. Two PI-ME/CFS  
250 participants were taking antiviral medications (acyclovir and valacyclovir). One HV was taking  
251 pre-exposure HIV prophylaxis. Four PI-ME/CFS participants were on  $\beta$ -blockers ( $n=3$ ) or  
252 hyperpolarization-activated cyclic nucleotide-gated channel blocker ( $n=1$ ), all for symptomatic  
253 treatment of orthostatic complaints. PI-ME/CFS participants used a range of vitamins,  
254 nutraceuticals, and dietary supplements, including Vitamin D ( $n=7$ ), Vitamin B12 ( $n=5$ ),  
255 Magnesium ( $n=4$ ), multivitamins ( $n=5$ ), CoQ10 ( $n=5$ ), and probiotics ( $n=2$ ).

256

#### 257 **Body Mass Composition was Normal in PI-ME/CFS**

258 There were no differences in body mass composition and Physiological Capacity Measures  
259 between PI-ME/CFS and HV participants. A subset of the cohort (HV 11, PI-ME/CFS 16)  
260 underwent whole-body composition and distribution measurements by dual-energy x-ray  
261 absorptiometry. No group differences in whole-body lean body mass (Figure S2A), fat mass  
262 (Figure S2B), bone mineral content (Figure S2C), % body fat (Figure S2D), or visceral fat mass  
263 (Figure S2E) were observed. The lean mass of the dominant arm (Figure S2F) and both legs

264 (Figure S2G) were also not different between the groups. There were also no differences in  
265 body composition between HV and PI-ME/CFS when sex-specific analyses were conducted.  
266

### 267 **Mitochondrial Genetics and Mitochondrial Function was Unrevealing in PI-ME/CFS**

268 Mitochondrial genetics and a measure of mitochondrial function were normal in PI-ME/CFS. All  
269 PI-ME/CFS participants had variants in mitochondrial genes, however, most were of uncertain  
270 significance and of low (<15%) heteroplasmy. Some mutations in mitochondrial proteins were  
271 found in genes encoded by nuclear DNA. Of these, three individuals had variants in DNA  
272 polymerase gamma, two in methionyl-tRNA formyltransferase, two in lysosomal associated  
273 membrane protein-2, and two in arginyl-tRNA synthetase. The significance of these variants is  
274 uncertain.  
275

276 Variants in the mitochondrial genome were annotated to the 162 mitochondrial genes in the PI-  
277 ME/CFS cohort (Data S10). Of these, 17 mitochondrial genes had missense variants in >90% of  
278 the patient cohort and eight mitochondrial genes had non-coding intronic variants in >90% of  
279 the patient cohort, with three genes, *EARS2*, *GARS*, and *OPA1*, having both missense and  
280 intronic variants in the patient cohort. All the variants identified were reported as non-  
281 deleterious.  
282

283 Using a mitochondrial flux assay on peripheral blood mononuclear cells (PBMCs) in resting  
284 participants, no median group differences in basal (Figure S3A), maximal respiration (Figure  
285 S3B), or non-mitochondrial (Figure S3C) oxygen consumption were observed.  
286

### 287 **Muscle Histology was Unrevealing in PI-ME/CFS**

288 A measure of muscular deconditioning was not different between the PI-ME/CFS and HV groups  
289 but some PI-ME/CFS participants had low values. Type2:Type1 muscle fiber median Feret  
290 diameter ratio (Type 2:1 mFd): Muscle biopsy samples from the vastus lateralis were stained  
291 with ATPase pH 9.4 stain and measured. No group differences were seen in Type 2:1 mFd (0.92  
292 [0.88, 1.0] versus 0.83 [0.76, 1.03],  $p=0.1$ ). The variance of Type 2:1 mFd was notably wider in  
293 PI-ME/CFS participants (Figure S3D).  
294

295 No correlations were noted between median Type2:1 mFd and dominant lean arm mass  
296 ( $r(5)=0.14$ ,  $p=0.8$  versus  $r(7)=0.43$ ,  $p=0.2$ ) and lean leg mass ( $r(6)=0.1$ ,  $p=0.8$  versus  $r(7)=0.44$ ,  
297  $p=0.2$ ).  
298

### 299 **Consumption of Dietary Fat was High and Fiber was Low in PI-ME/CFS**

300 The Diet History Questionnaire II (DHQII) results indicated there were no group differences in  
301 total energy intake ( $1960.6 \pm 790.9$  versus  $1640.2 \pm 571.4$  kcal,  $p=0.2$ ), or energy intake derived  
302 from fat, carbohydrate, protein, or alcohol (Data S11). Dietary fiber intake was greater in HVs  
303 ( $14.5 \pm 5.8$  versus  $11.1 \pm 5.8$  gm/1000 kcal;  $p=0.03$ ). Seven-day food records results were similar  
304 to DHQII results except no differences were found between groups for dietary fiber intake and  
305 less energy from saturated fat was identified in HVs compared to PI-ME/CFS participants ( $9.6 \pm$   
306  $2.9$  versus  $13.5 \pm 2.8$  % kcals/day;  $p=0.01$ ; (Data S11). Thus, PI-ME/CFS consume less dietary  
307 fiber and more saturated fat than HV participants.

308

309 No group differences in dietary intake of calcium, sodium, vitamin D, gluten or caffeine were  
310 noted. However, food records showed HVs had higher intake of dietary iron ( $8.3 \pm 2.6$  versus  $6.4$   
311  $\pm 0.9$  mg/1000 kcal;  $p=0.05$ ) and folate ( $279.5 \pm 87.0$  versus  $207.6 \pm 45.6$  mcg/1000 kcal;  
312  $p=0.03$ ).

313

### 314 **PI-ME/CFS individuals had Disruption of Sleep Patterns Unconfirmed by Polysomnography**

315 PI-ME/CFS participants complained of significantly more disordered sleep symptoms than HVs,  
316 with increased scores on the Pittsburgh Sleep Quality Index ( $3.2 \pm 2.5$  versus  $7.8 \pm 3.4$ ,  
317  $p=0.0001$ ), PROMIS Sleep Disturbance ( $40.4 \pm 6.0$  versus  $55.3 \pm 9.5$ ,  $p=0.00002$ ), and PROMIS  
318 Sleep Related Impairment ( $40.0 \pm 7.1$  versus  $61.3 \pm 6.9$ ,  $p=0.000001$ ). The qualitative experience  
319 of disordered sleep is evoked in this participant description: "There are times since I've been ill,  
320 I'm so sleepy I can't stay awake. I sleep a few hours and then I wake up [and feel like] I have a  
321 hangover for a couple of hours. But [the vast majority of the time] I don't sleep but I'm  
322 horizontal."

323

324 All PI-ME/CFS participants underwent polysomnography in a sleep laboratory. Two had mild  
325 periodic limb movements (PLM Index  $\geq 5$ ,  $< 25$ ), two had mild sleep apnea (Apnea Hypopnea  
326 Index  $\geq 5$ ,  $< 15$  per hour), and one had moderate sleep apnea (Apnea Hypopnea Index  $\geq 15$ ,  $< 30$   
327 per hour). None of these individuals noted substantial improvement after a six-week trial of  
328 CPAP. Sleep fragmentation was noted in 10 PI-ME/CFS participants (three mild, five moderate,  
329 two severe). Thus, PI-ME/CFS participants reported moderate sleep dysfunction not explained  
330 by polysomnographic evaluation.

331

### 332 **Dysautonomia was Common in PI-ME-CFS**

333 Twenty-four hour ambulatory ECG (8am to 8am) was used to assess heart rate variability (HRV)  
334 in the time and frequency domains as well as through non-linear methods. PI-ME/CFS  
335 participants showed diminished HRV by three time domain indices (SDNNi:  $67.1$  [IQR  $58.9-77.1$ ]  
336 versus  $54.2$  [46.1-64.5],  $p = 0.01$ ; rMSSD:  $38.7$  [30.1-52.2] versus  $25.1$  [24.5-36.5],  $p = 0.02$ ;  
337 pNN50:  $12.5$  [IQR 6.1-19.4] versus  $3.7$  [3.1-7.4],  $p=0.01$ ; Figures 2B-2D).

338

339 PI-ME/CFS participants further showed altered frequency domain differences, including  
340 decreased high frequency (HF) power (Estimated mean  $607 \pm SE 7.1$  versus  $326 \pm SE 7.1$  ms<sup>2</sup>,  $p$   
341  $= 9.9E-85$ ) and decreased low frequency (LF) power ( $1273 \pm SE 13.8$  versus  $763 \pm SE 13.8$  ms<sup>2</sup>,  $p$   
342  $= 9.3E-78$ ) when compared to HVs (Figures 2E-F, data shown in log scale).

343

344 Non-linear analyses further demonstrated group differences in SD1, SD2, and SD1/SD2. Group  
345 heart rates averaged over five-minute intervals (Estimated mean  $71.7 \pm 0.13$  (SE) versus  $74.5 \pm$   
346  $0.13$  (SE) beats per minute,  $p = 0.32E-41$ ) displayed two notable trends (Figure 2G). Increased  
347 heart rate in PI-ME/CFS participants throughout the twenty-four hour period suggests  
348 comparatively increased sympathetic activity. HVs had a comparatively significant decline in  
349 nighttime heart rate.

350



351 Head-up tilt table testing at 70 degrees from horizontal for up to 40 minutes was performed  
352 during which finger blood pressure (BP) was monitored continuously and upper arm blood  
353 pressure measured with a cuff every four minutes. Orthostatic BP decreases of  $\geq 20$  mmHg  
354 were similar for both groups (PI-ME/CFS=9/16, HV=7/17). The frequencies of excessive  
355 orthostatic tachycardia at 10 minutes also did not differ (PI-ME/CFS=6/16, HV=3/17)<sup>2</sup>. The  
356 occurrences of symptoms by 40 minutes did not differ between groups (PI-ME/CFS=7/16,  
357 HV=7/17).

358  
359 Plasma levels of catecholamines were measured at several time points during the orthostatic  
360 challenge. The plasma epinephrine and plasma norepinephrine responses to being tilted are  
361 illustrated in Figures S4A and S4B. There was no difference in the epinephrine/norepinephrine  
362 ratio between the groups (Figure S4C).

363  
364 Indices of baroreflex-cardiovagal and baroreflex-sympathoneural gain were obtained based on  
365 interbeat intervals and BP responses during Phase II of the Valsalva maneuver. The PI-ME/CFS  
366 group had a lower mean baroreflex-cardiovagal gain (baroslope mean  $\pm$  SE:  $5.8 \pm 0.6$  versus  $4.6$   
367  $\pm 0.7$  ms/mmHg,  $p=0.03$ ; Figure 2H). There were several indices of baroreflex-sympathoneural  
368 function. The PI-ME/CFS participants had longer blood pressure recovery times ( $3.0 \pm 0.2$  versus  
369  $4.1 \pm 0.4$  sec,  $p=0.01$ ), but the groups did not differ in Phase II ( $99 \pm 19$  versus  $135 \pm 23$  mmHg-  
370 sec,  $p=0.2$ ), Phase IV ( $60 \pm 11$  versus  $87 \pm 15$  mmHg-sec,  $p=0.2$ ), or the sum of Phase II+Phase IV  
371 baroreflex areas ( $159 \pm 26$  versus  $222 \pm 29$  mmHg-sec,  $p=0.1$ ).

372  
373 Qualitative experience of dysautonomia was evoked in these participant descriptions. The  
374 description "If I try to do something upright even for a few minutes, I feel like I'm going to  
375 collapse. I get really hot, overheated, and my heart starts racing" relates to positional nature  
376 that these symptoms can have. Other descriptions such as "I have actually had four episodes of  
377 dizziness. [And] I just remembered [doctors are] always asking me if I'm dizzy. It's kind of a  
378 weird dizziness. If I were to describe it ... it feels like my brain is floating lead when it occurs.  
379 And that does not make sense at all but it's the only thing I can think of to describe it, because  
380 there's this heaviness of a floating dizziness" indicate that not all descriptions of dizziness can  
381 be related to dysautonomia.

### 382 383 **Effort Preference was Different between PI-ME/CFS and HV**

384 Alterations in the "sense of effort" have been reported in the literature<sup>3-5</sup>. Motivation was  
385 assessed using the Effort-Expenditure for Rewards Task (EEfRT) which assesses effort, fatigue,  
386 and reward sensitivity (Figure S5A). Graphical examples of differential effects with the EEfRT  
387 task are depicted for effort, fatigue, and reward (Figures S5B-D). Replicating the original  
388 modeling strategy for the EEfRT<sup>15</sup>, multiple models were evaluated to assess for group  
389 differences and assess for the presence of potential interaction effects. Model 1 tested the  
390 effects of reward value, reward probability, expected value, trial number, sex, and PI-ME/CFS  
391 diagnostic status on hard-task choice, without any interaction effects. Given equal levels and  
392 probabilities of reward, HVs chose more hard tasks than PI-ME/CFS participants (Odds Ratio  
393 (OR) = 1.65 [1.03, 2.65],  $p = 0.04$ ; Figure 3A). For all of the other replicated models, which  
394 tested the significance of the effects of the interactions of diagnostic status and reward

395 probability (Model 2), diagnostic status and reward value (Model 3), diagnostic status and  
396 expected value (Model 4), diagnostic status, reward probability, and reward value (Model 5),  
397 and diagnostic status and prior reward feedback (Model 6), none of the interaction terms were  
398 significant, so these models were dropped from consideration in favor of Model 1 for the final  
399 analysis. A new model, which included the interaction of diagnostic status and trial number to  
400 assess whether HVs and PI-ME/CFS participants differed in their rate of fatigue, also produced a  
401 non-significant interaction term, and was therefore also dropped from further consideration. As  
402 Models 2 and 3 did not show differences in reward sensitivity and probability sensitivity by  
403 group, further analysis was not performed<sup>6</sup>. No difference in decision timeliness was observed  
404 as measured by task decision timeouts (0.3% versus 0.6%,  $p = 0.19$ ).

405  
406 A significant three-way interaction of diagnostic status, task difficulty, and trial number on task  
407 performance, measured by button press rate, was observed. Average button press rates  
408 declined significantly over time in the PI-ME/CFS participants, but only for easy tasks (Slope = -  
409 0.008, SEM = 0.002,  $p = 0.003$ ; Figure 3B). This decline was not seen during the hard tasks,  
410 signifying that the declines were not due to fatigue (Figure 3B). A significant two-way  
411 interaction of diagnostic status and task difficulty on task completion, itself a function of button  
412 press rate, was also observed. HVs were more likely to complete hard tasks compared to PI-  
413 ME/CFS participants by an immense magnitude (OR = 27.23 [6.33, 117.14],  $p < 0.0001$ ), but  
414 were no more or less likely to complete easy tasks compared to PI-ME/CFS participants (OR =  
415 1.61 [0.31, 8.47],  $p > 0.05$ ). Thus, the decline in button press rate on easy tasks observed over  
416 time in the PI-ME/CFS participants did not correspond to increased failure rate on the easy  
417 tasks. It appears that the PI-ME/CFS participants reduced their mechanical effort while  
418 maintaining performance on the easy tasks in a fashion not observed in HVs.

419  
420 The Proportion of Hard-Task Choices was used as a correlate representing effort preference,  
421 the decision to avoid the harder task when decision-making is unsupervised and reward values  
422 and probabilities of receiving a reward are standardized.

423  
424 The finding of a difference in effort preference is consistent with how participants describe  
425 pacing. One participant describes: "You have to make a conscious choice of how much energy  
426 [to use and] whether or not something is worth crashing for. It's hard because no sane person  
427 would ever participant to suffer and ... that's what you're doing [by choosing] an activity that ...  
428 will make you crash. You are going to suffer... You have to decide what gives you meaning and  
429 what is worth it to you."

#### 430 431 **Physical Performance Measures showed Differences between PI-ME/CFS and HV groups**

432 A subset of participants (11 HV, 11 PI-ME/CFS) wore activity monitors on their hip and wrist for  
433  $12.6 \pm 5.2$  days at home. HV had greater hip activity as measured in 3-D vector magnitude  
434 counts/day ( $60,4988 \pm 29,0887$  versus  $36,7415 \pm 15,1080$ ;  $p=0.03$ ), steps/day ( $7,111 \pm 2,432$   
435 versus  $3,618 \pm 1,682$ ;  $p<0.001$ ), and minutes of moderate physical activity (i.e. 3-6 x basal  
436 energy expenditure;  $40.64 \pm 37.4$  versus  $6.4 \pm 7.0$ ;  $p=0.007$ ). No differences in sedentary ( $1021$   
437  $\pm 146$  versus  $988 \pm 177$  min/day), light movement ( $283 \pm 71$  versus  $230 \pm 93$  min/day) vigorous  
438 activity ( $1.6 \pm 3.7$  versus  $0.2 \pm 0.6$  min/day), or daily wrist activity ( $1,795,199 \pm 582,291$  versus

439 1,901,063  $\pm$  654,127;  $p=0.7$ ) were noted between the groups. This measured difference is  
440 evoked in this participant's description of their physical abilities: "I can't really walk more than  
441 half a block ... that would be pushing it [and] I probably wouldn't be doing two loads of laundry  
442 that same day. I could, on my very best day, [go up and down the stairs a few times to] do two  
443 loads of laundry, driving, walking a short distance, and cooking dinner. I do have a stool that I  
444 sit on [when cooking]."

445  
446 Using a dynamometer, maximal grip strength and time to failure to maintain 50% maximal  
447 strength was measured. No group difference in maximal grip strength was noted in the  
448 dominant hand (37.8  $\pm$ 11.5 versus 34.5  $\pm$ 12.0 kg,  $p=0.35$ ; Figure 3C). Time to failure was shorter  
449 in the PI-ME/CFS participants (30.5  $\pm$ 10.3 versus 15.7  $\pm$ 10.0 seconds,  $p=0.0002$ ; Figure 3D).  
450 These findings are evoked in this participant's description of their strength: "Interestingly, I can  
451 still [grip strong]... Everyone says I'm strong but when it comes to [holding it for a while, I] don't  
452 do well at all... Even though I have this incredible fatigue, I can still get up and do something  
453 and look normal."

454  
455 For the single grip test, maximum grip force correlated with lean arm mass (Figure S6A) and did  
456 not correlate with effort preference (Figure S6B) or Type2:1 mFd (Figure S6C) for both groups.  
457 Time to failure correlated with effort preference in PI-ME/CFS but not in HVs (Figure S6E). Time  
458 to failure did not correlate with lean arm mass (Figure S6D) or Type2:1 mFd (Figure S6F) in  
459 either group.

460  
461 To assess physical fatigue, participants maintained their grip at 50% of maximum voluntary  
462 contraction (MVC) in successive blocks of 30 seconds interspaced with 30 second rest blocks  
463 (Figure S7A). Electromyography (EMG) of the flexor and extensor carpi radialis (FCR, ECR) and  
464 abductor pollicis brevis (APB) were recorded to quantify the grip.

465  
466 Single pulse transcranial magnetic stimulation (TMS) was done to probe excitability of the  
467 primary motor cortex (M1) via the motor evoked potential (MEP) of the APB during the rest  
468 blocks.

469  
470 The development of fatigue during the grip task was analyzed by comparing groups and time.  
471 For muscle fatigue, we used the Dimitrov index (DI) <sup>7,8</sup> to evaluate the shift in EMG frequency  
472 power within blocks.

473  
474 MVC did not significantly differ between groups ( $t(12) = 1.4$ ,  $p = 0.18$ ). Repetitive grip testing  
475 showed a significantly different rapid decline in force ( $-1.2 \pm 4$  versus  $-6.4 \pm 4$  kilogram-force,  
476  $t(12) = 2.46$ ,  $p = 0.03$ ), a significantly lower number of non-fatigued blocks (Figure 4A), and a  
477 relative decrease in slope of the DI ( $0.2 \pm 0.5$  versus  $-0.43 \pm 0.3$ ,  $t(12) = 3.2$ ,  $p=0.008$ ; Figure 4B) in  
478 PI-ME/CFS participants but remained constant in HVs. This indicates that HVs performed  
479 consistent muscular work to generate lactate throughout the entire task while PI-ME/CFS  
480 participants only performed enough muscular work to generate lactate early in the task but  
481 then subsequently stopped performing enough muscular work. The amplitude of the MEPs of  
482 HVs significantly decreased over the course of the task, consistent with post-exercise

483 depression<sup>9</sup>, while the amplitudes of the MEPs of PI-ME/CFS participants significantly increased  
484 (-0.13 ±0.2 versus 0.13 ±0.2 MEP units;  $t(12) = 2.4$ ,  $p = 0.03$ ; Figure 4C). The M-max remained  
485 constant in both groups. This indicates that M1 remained more excitable for PI-ME/CFS,  
486 suggesting reduced motor engagement from this group<sup>10</sup>.

487

488 Total motor output, the sum of all the forces generated during the entire task, did not correlate  
489 with effort preference (Figure S7B) or lean arm mass (Figure S7C). No significant correlation  
490 was noted between total motor output and Type2:1 mFd (Figure S7D), suggesting that muscular  
491 deconditioning was not responsible for group differences noted in muscle strength measures.

492

493 The repetitive grip force paradigm was repeated in the fMRI environment and blood oxygen  
494 level dependent (BOLD) signal of the brain was measured. Grip force (decline rate:  $-6.3 \pm 5$   
495 versus  $-11.9 \pm 3$ ,  $t(16) = 2.83$ ,  $p = 0.01$ ; Figure S7E) and fatigue VAS score ( $t(11) = 4.6$ ,  $p = 0.0007$ )  
496 were consistent with the results above.

497

498 BOLD signal on fMRI of PI-ME/CFS participants decreased across blocks in the bilateral  
499 temporo-parietal junction (TPJ), bilateral superior parietal lobule, and right temporal gyrus in  
500 contradistinction to the increase observed in HVs, resulting in significant group differences  
501 ( $F(3,45) = 5.4$ , voxel threshold  $p \leq 0.01$ , corrected for multiple comparisons  $p \leq 0.05$ ,  $k > 65$ ;  
502 Figures 4D-E).

503

#### 504 **Cardiopulmonary Exercise Test showed Differences between PI-ME/CFS and HV groups**

505 A subset of the cohort underwent a cardiopulmonary exercise test (CPET) (HV=nine; PI-ME/CFS  
506 =nine) by upright cycle ergometry (Figure S8A). To achieve the peak work rate during an  
507 optimum testing time of eight to twelve minutes for both groups, PI-ME/CFS participants were  
508 tested at a lower ramp protocol of 15 Watts/min compared to 15-25 Watts/min for HVs. All but  
509 one PI-ME/CFS participant reached the peak respiratory exchange ratio (RER) of 1.1 or higher  
510 and RER was similar between the groups ( $1.30 \pm 0.08$  versus  $1.24 \pm 0.12$ ,  $p=0.2$ ), which  
511 demonstrates that all participants performed at a level sufficient to require anaerobic  
512 respiration. Effort preference did not correlate with peak power in PI-ME/CFS participants  
513 ( $r(6)=0.13$ ,  $p=0.8$ ) which suggests that effort preference did not impact CPET performance,  
514 perhaps related to experimental incentives to push their limits. This is opposite to the behavior  
515 of the HVs, where effort preference trends towards a moderately strong correlation with peak  
516 power on CPET despite not correlating with grip strength tasks (Figure S8B). This seems  
517 congruent with participant descriptions of performing CPET such as: "I was biking and I wanted  
518 to push myself as hard as I could for the research ... and there was this point where I almost  
519 stopped [and] thought I was going to stop... My revolutions per minute dipped [and they were]  
520 ready to catch me. I [then asked] if I could lean forward on my elbows. They let me, so I did, and  
521 then I kept going... Then there was this point where [I could not go] any longer and [I] made a  
522 hand motion and slumped off the bike with their help... I don't know if I can remember a time  
523 where I felt [that fatigued] immediately in that moment."

524

525 During CPET, the ratio of Ventilation/ $V\dot{C}O_2$ , oxygenation of the quadricep muscle as measured  
526 by Near Infrared Spectroscopy, or in gross mechanical efficiency were not different between  
527 groups (Figures S8C-E).

528

529 Peak power ( $222.1 \pm 46.5$  versus  $158.3 \pm 91.1$  Watts,  $p=0.08$ ), peak respiratory rate ( $38.9 \pm 6.8$   
530 versus  $28.7 \pm 6.2$  breaths/minute,  $p=0.005$ ), and peak heart rate (absolute:  $172.6 \pm 12.3$  versus  
531  $149.7 \pm 29.7$ ,  $p=0.07$ ) were all lower in the PI-ME/CFS participants, reflecting a differential of  
532 cardiorespiratory capacity between the groups (Figure 5A-C). Peak power highly correlated to  
533 lean leg mass in both groups ( $r(9)=0.76$ ,  $p=0.02$  versus  $r(8)=0.91$ ,  $p=0.001$ ; Figure S8G). Peak  
534 power did not correlate with Type2:1 mFd in either group ( $r(7)=0.05$ ,  $p=0.9$  versus  $r(5)=0.82$ ,  
535  $p=0.09$ ; Figures S8H).

536

537 Peak  $VO_2$  was lower in PI-ME/CFS participants ( $32.8 \pm 6.6$  versus  $20.1 \pm 7.9$  mL/kg/min,  
538  $p=0.004$ ; Figure 5D), a difference of approximately 3.3 metabolic equivalent of task units  
539 (METs). Peak  $VO_2$  strongly correlated with Type2:1 mFd ( $r(7)=-0.08$ ,  $p=0.9$  versus  $r(5)=0.94$ ,  
540  $p=0.02$ ; Figure S8I) in PI-ME/CFS but not HVs, and did not correlate with lean leg mass ( $r(7)=-$   
541  $0.08$ ,  $p=0.8$  versus  $r(6)=0.66$ ,  $p=0.08$ ) in either group.

542

543 PI-ME/CFS participants achieved a lower percent of their predicted  $VO_{2peak}$  ( $96.2 \pm 33.7\%$  versus  
544  $71.4 \pm 15.9\%$ ,  $p=0.004$ ) as determined by the Wasserman-Hansen cycling equation<sup>11,12</sup>, based  
545 on each participant's age, sex, height, and weight (Figure 5E). Similarly, PI-ME/CFS participants  
546 reached a lower percent of their age predicted maximal heart rate ( $220 \text{ beats} \cdot \text{min}^{-1} - \text{age in yrs}$ ;  
547  $95.9 \pm 5.3\%$  versus  $83.7 \pm 13.6\%$ ,  $p=0.02$ ; Figure S8F).

548

549 PI-ME/CFS participants had a higher resting heart rate (absolute:  $64.6 \pm 7.8$  versus  $72.9 \pm 9.8$ ,  
550  $p=0.07$ ) and a lower peak heart rate (absolute:  $172.6 \pm 12.3$  versus  $149.7 \pm 29.7$ ,  $p=0.07$ ), leading  
551 to a lower heart rate reserve ( $107.9 \pm 15.4$  versus  $76.8 \pm 28.1$  bpm,  $p=0.02$ ; Figure 5F).  
552 Chronotropic incompetence, as measured by age-predicted HRR (%pHRR), was noted in five of  
553 eight PI-ME/CFS and one of nine HVs ( $\chi^2(1, n=17) = 4.9$ ,  $p=0.03$ ). The slope of the heart rate  
554 response during the CPET was also lower in PI-ME/CFS participants compared to HVs ( $1.03 \pm$   
555  $0.16$  versus  $0.70 \pm 0.27$ ,  $p < 0.01$ ; Figure 5G). PI-ME/CFS participants have less cardiovascular  
556 capacity to respond to an exercise challenge.

557

558 The anaerobic threshold (AT), the point where the body switches from mostly aerobic to  
559 anaerobic metabolism, was achieved within a similar time period in both groups ( $298.3 \pm 99.6$   
560 versus  $279.3 \pm 195.7$  seconds,  $p=0.8$ ). The switch to anaerobic metabolism occurred at lower  
561 peak  $VO_2$  levels in the PI-ME/CFS than in HVs ( $16.0 \pm 4.3$  versus  $11.0 \pm 3.9$  mL/kg/min,  $p=0.02$ ;  
562 Figure 5H), a difference of approximately 1.4 METs. This data demonstrates less efficient  
563 oxidative respiration in PI-ME/CFS participants. Type2:1 mFd strongly correlated with  $VO_2$  at AT  
564 ( $r(5)=-0.33$ ,  $p=0.5$  versus  $r(3)=0.92$ ,  $p=0.03$ ; Figure S8J) and trended to correlate with power at  
565 AT ( $r(5)=0.026$ ,  $p=0.6$  versus  $r(3)=0.75$ ,  $p=0.1$ ; Figure S8K) in PI-ME/CFS but not HVs.

566

567 **Salivary Cortisol Levels were Lower in PI-ME/CFS in Response to Exercise**

568 No group differences in morning ( $0.49 \pm 0.3$  versus  $0.37 \pm 0.15$   $\mu\text{g/dL}$ ,  $p = 0.18$ ), noon ( $0.16 \pm$   
569  $0.11$  versus  $0.18 \pm 0.05$   $\mu\text{g/dL}$ ,  $p = 0.4$ ), or nighttime ( $0.07 \pm 0.02$  versus  $0.08 \pm 0.04$   $\mu\text{g/dL}$ ,  $p =$   
570  $0.7$ ) measurements of salivary cortisol were noted. After CPET, PI-ME/CFS participants had a  
571 lower cortisol response than HVs ( $0.43 \pm 0.28$  versus  $0.22 \pm 1.2$   $\mu\text{g/dL}$ ,  $p=0.03$ ; Figure S8L).

572

### 573 **Measures of Energy Expenditure and Respiratory Exchange were Similar in PI-ME/CFS and HV**

574 The subset of the cohort that underwent a cardiopulmonary exercise test (CPET) (HV=nine; PI-  
575 ME/CFS =nine) underwent whole-room indirect *calorimetry* that started the day prior to CPET  
576 and was completed 72 hours after CPET.

577

578 All participants spent this time at rest and there were no differences in activity while in the  
579 chamber, as measured by microwave activity ( $8.9 \pm 3.6$  vs  $7.6 \pm 3.5$  % of time active;  $p = 0.4$ ),  
580 hip actigraphy ( $86.4 \pm 45.9$  versus  $95.2 \pm 71.9$  3-D vector magnitude counts/min;  $p=0.7$ ) and  
581 wrist actigraphy ( $630.3 \pm 335.3$  versus  $775.2 \pm 362.6$  3-D vector magnitude counts/min;  $p=0.3$ ).

582

583 No differences in total ( $1947 \pm 249$  versus  $1976 \pm 437$  kcal/day;  $p=0.4$ ), sleeping energy  
584 expenditure ( $1497 \pm 210$  versus  $1554 \pm 335$  kcal/day;  $p=0.2$ ), or respiratory quotient  
585 ( $\text{VCO}_2/\text{VO}_2$ ) (Daily:  $0.86 \pm 0.03$  versus  $0.88 \pm 0.04$ ,  $p=0.2$ ; Sleep:  $0.84 \pm 0.03$  versus  $0.86 \pm 0.03$ ,  
586  $p=0.1$ ) were observed between the groups after a baseline day of rest, even after adjustment  
587 for known covariates, i.e. age, sex, fat mass, and fat-free mass<sup>13</sup> (Figures S9A-D, Data S12).

588

589 In the CPET cohort, no group differences were noted in energy intake or in total body energy  
590 use, sleeping energy use from baseline in the 72 hours following the exercise challenge after  
591 controlling for age, sex, fat mass, and fat-free mass. Similarly, no group differences in the  
592 respiratory quotient or activity level in the calorimeter were observed 48 hours after exercise  
593 (Data S12).

594

595 No group differences in basal, maximal respiration, or non-mitochondrial oxygen consumption  
596 were observed at baseline, 24, 48, or 72 hours after CPET (Figures S9E-G).

597

598 Thus, there were no differences in energy expenditure and respiratory exchange between the  
599 PI-ME/CFS and HV groups.

600

### 601 **PI-ME/CFS Individuals had Substantial Cognitive Symptoms but Normal Neurocognitive** 602 **Testing**

603 Perception of cognitive function was measured with the Multiple Ability Self-Report  
604 Questionnaire (MASQ). Total cognitive complaints were greater in PI-ME/CFS ( $66.9 \pm 14.7$   
605 versus  $92.1 \pm 17.6$ ,  $p=0.00006$ ). PI-ME/CFS participants had more self-reported deficits in all  
606 domains measured, including attention ( $14.3 \pm 4.7$  versus  $20.6 \pm 4.1$ ,  $p=0.0005$ ), verbal memory  
607 ( $15.0 \pm 3.4$  versus  $20.9 \pm 4.9$  versus,  $p=0.0002$ ), visuoperceptual ( $9.9 \pm 3.2$  versus  $13.0 \pm 4.1$ ,  
608  $p=0.02$ ), language ( $12.6 \pm 2.7$  versus  $18.9 \pm 4.6$  versus  $12.6 \pm 2.7$ ,  $p=0.00004$ ), and visual  
609 memory ( $13.3 \pm 3.1$  versus  $16.1 \pm 4.3$ ,  $p=0.09$ ; Figure 1C). The qualitative experience of  
610 cognitive symptoms is evoked in this participant description: "It feels like, thinking is really  
611 slowed, like my head is really fuzzy, full of cotton. It feels like my brain's shutting down. Not

612 sure how to describe it, just kind of like a low power state, low energy state. And also I guess  
613 there's a heaviness. There's kind of a sensation of my head feels kind of heavy."

614

615 Participants performed a neuropsychological testing battery which took on average three hours  
616 to complete. There were no group differences on performance of any of the 15  
617 neuropsychological tests administered (Data S13). Over the course of the testing battery, there  
618 was no evidence of a differential degradation of performance between the groups.  
619 Performance of the Test of Variables of Attention (TOVA), a sensitive measure of sustained  
620 attention which was completed after two hours of testing, was no different between the groups  
621 ( $1.1 \pm 3.6$  versus  $0.9 \pm 4.7$ ,  $p=0.9$ ). No correlations were noted between any of the 15  
622 neuropsychological tests administered and effort preference.

623

624 A 0-100 points visual analog scale (VAS) was used to assess fatigue, effort, and performance  
625 over the testing period in a subgroup of 8 HV and 10 PI-ME/CFS participants (Figures S10A-D).  
626 PI-ME/CFS participants noted substantially more mental ( $15.6 \pm 22.0$  versus  $34.9 \pm 23.6$ ,  $p=0.04$ )  
627 and physical ( $19.2 \pm 23.7$  versus  $41.8 \pm 25.1$ ,  $p=0.02$ ) fatigue immediately prior to starting the  
628 testing battery. Both groups reported incremental increases in mental and physical fatigue over  
629 the testing period. The two-way interaction of diagnostic status and trial number was not  
630 significant, signifying that both groups endorsed self-reported fatigue at an equal rate. Both  
631 groups reported giving a high level of effort ( $87.6 \pm 16.8$  versus  $97.4 \pm 4.7$ ,  $p=0.05$ ) and a similar  
632 level of perceived performance ( $76.8 \pm 25.0$  versus  $74.2 \pm 18.9$ ,  $p=0.9$ ) over the entire testing  
633 period.

634

635 More limited testing was also performed before and 48 hours after exercise stress in the CPET  
636 cohort. Performance on the BVMT and TOVA did not change for either group 48 hours after  
637 CPET.

638

### 639 **Cerebrospinal Fluid Catechol levels Corelated with Perception and Behavior, but not Cognitive** 640 **Performance**

641 A schematic of the catechol pathway can be viewed in Figure S11A. The PI-ME/CFS group had  
642 mean decreases in cerebrospinal fluid levels of DOPA ( $746 \pm 200$  versus  $605 \pm 138$  pg/ml;  
643  $p=0.02$ ; Figure 6A), DOPAC ( $350 \pm 130$  versus  $263 \pm 111$  pg/mL,  $p=0.04$ ; Figure 6B), and DHPG  
644 ( $1922 \pm 547$  versus  $1466 \pm 334$  pg/ml;  $p=0.006$ ; Figure 6C). Levels of norepinephrine (NE) ( $145 \pm$   
645  $71$  versus  $116 \pm 43$  pg/mL,  $p=0.16$ ), cys-DOPA ( $278 \pm 61$  versus  $249 \pm 107$  pg/mL,  $p=0.3$ ), and  
646 dopamine ( $8.5 \pm 4.6$  versus  $9.7 \pm 6.2$  pg/mL,  $p=0.5$ ) did not differ between the groups.

647

648 Catechol data was reanalyzed to determine the impact of central acting medications on the  
649 results. Excluding participants using amphetamines did not alter the above results. Excluding  
650 participants using benzodiazepines or tricyclic compounds, the significant differences in DHPG  
651 and DOPA remained. Excluding participants using serotonin-norepinephrine uptake inhibitors,  
652 DHPG, DOPA, DOPAC, and Cys-DOPA were significantly lower in the PI-ME/CFS group.

653

654 In the grip strength task, NE correlated with both Time to Failure ( $r(13)= 0.61$ ,  $p=0.02$ ; Figure  
655 6D) and effort preference ( $r(12)= 0.65$ ,  $p=0.01$ ; Figure 6E) for PI-ME/CFS participants. Dopamine

656 correlated with Time to Failure on the grip strength task ( $r(12) = 0.65$ ,  $p=0.01$ ; Figure 6F) but  
657 not effort preference (Figure S11B). For HVs, DHPG correlated with effort preference ( $r(12)= -$   
658  $0.60$ ,  $p=0.02$ ; Figure 6G) but not Time to Failure ( $r(16)=0.02$ ,  $p=0.9$ ; Figure S11C).

659  
660 Several cognitive symptom measures correlated with catechols in PI-ME/CFS participants.  
661 Specifically, NE correlated with MMPI total cognitive complaints (Figure S12A). Dopamine  
662 correlated with visual-spatial memory (Figure S12B). cys-DOPA correlated with MMPI total  
663 cognitive complaints (Figure S12C), language (Figure S12D) and visuoperception (Figure S12E).  
664 DOPAC correlated with MMPI total cognitive complaints (Figure S12F) and  
665 attention/concentration (Figure S12G). DHPG correlated with attention/concentration  
666 complaints (Figure S12H) and visuoperception (Figure S12I). No significant correlations with  
667 cognitive symptom measures were seen in HVs. In contradistinction, few catechols correlated  
668 with objective neurocognitive performance in PI-ME/CFS. Only the Wisconsin Card Sort Test  
669 correlated with DOPA in PI-ME/CFS participants (Figure S12J). For HVs, several correlations  
670 between catechols and neuropsychological tests were observed. Norepinephrine correlated  
671 with performance on the WAIS Symbol Search Scale (Figure S12K), DOPA with both the Brief  
672 Visual Memory Test-Revised Recall (Figure S12L) and Hopkins Verbal Learning Test-Revised  
673 Total score (Figure S12M), and cys-dopamine (Figure S12N) and DOPAC (Figure S12O) with the  
674 WAIS Coding Scale. These correlations suggest that perception and behavior, but not cognitive  
675 performance, are related to catechols in PI-ME/CFS participants.

676

#### 677 **Cerebrospinal Fluid Metabolites were Dysregulated in PI-ME/CFS**

678 Catechols metabolites were different in PI-ME/CFS compared to the HV group, with a  
679 downregulation of tryptophan metabolites.

680

681 Metabolites, 388 named and 57 unnamed, in cerebrospinal fluid were analyzed. A group  
682 difference in these central nervous system compounds was observed (Figure 6H). Univariate  
683 analysis identified several differentially expressed metabolites that were statistically significant  
684 after multiple comparison correction (Figure 6I). Of the top 15 differentially expressed  
685 metabolites, several metabolites in the tryptophan pathway were downregulated in PI-ME/CFS  
686 participants. Other metabolites that were decreased included glutamate and dopamine 3-O-  
687 sulfate. Analysis of branch chain amino acids showed a decrease in butyrate, as well as  
688 decreased metabolites related to the tricarboxylic acid pathway in PI-ME/CFS participants (Data  
689 S14A). There was also an overall decrease in polyamine metabolites. Partial least square  
690 discriminant analysis (PLSDA) of metabolites in case-control analysis identified eight  
691 metabolites with variable importance in prediction (VIP) score  $>1$ . No pathway level inference  
692 could be made, and a subset of VIP metabolites were also differentially expressed metabolites  
693 as noted above (Figures S13A-C, Data S14B).

694

695 PLSDA of metabolites in the sex-separated cohorts were also performed. In the male cohort,  
696 the VIP metabolites included threonine and glutamine whose average expression was lower in  
697 PI-ME/CFS patients compared to HVs. Since the tryptophan pathway metabolites were not  
698 identified in this analysis, all samples were included irrespective of the males' selective  
699 serotonin reuptake inhibitor (SSRI) drug intake history (Figures 6J, Figure S13D, Data S14C). In



700 the female cohort, VIP metabolites functioning in the tryptophan pathway and butyrate  
701 metabolism were differentially expressed (Figures 6K, Figure S13E, Data S14D). Since several  
702 participants had a history of using selective serotonin reuptake inhibitor drugs, the PLSDA  
703 analysis of metabolite profile in the female cohort was performed after excluding the  
704 participants using SSRIs. The metabolites in tryptophan metabolism were identified as  
705 important predictors in this smaller cohort, suggesting that the changes in the tryptophan  
706 metabolism is not a result of the drug uptake.

707

#### 708 **PI-ME/CFS Individuals had Immune Activation and Immune Exhaustion**

709 Alterations in B-cells and PD-1 positive CD8 T-cells were observed with flow cytometry of blood  
710 and cerebrospinal fluid.

711

712 Immunophenotyping by flow cytometry was performed on blood and cerebrospinal fluid  
713 (Figures 7A-F, Data S15A-D). No group differences in CD4/CD8 ratio, activated CD4 T cells  
714 (CD25), memory follicular helper T cells (CD45RA<sup>+</sup>, CXCR5<sup>+</sup>), CD4 and CD8 effector memory T  
715 cells, CD4 and CD8 effector T cells, B cells, or B cells/monocyte ratio were observed. An increase  
716 in percentage of naïve and decrease in switched memory B-cells in blood were observed in PI-  
717 ME/CFS participants (Figures 7A-B). Two PI-ME/CFS participants had detectable antibody  
718 secreting B cells in the cerebrospinal fluid; these participants did not have measured oligoclonal  
719 bands or autoantibodies. There was no difference in the frequency of natural killer (NK) cells  
720 between the groups, but a subset of PI-ME/CFS participants had elevated NK CD56 bright/dim  
721 ratio in the cerebrospinal fluid.

722

723 Markers of T-cell activation, PD-1<sup>+</sup> CD8 T-cells, were elevated in the cerebrospinal fluid of PI-  
724 ME/CFS participants (Figure 7C) but not in blood. PD-1<sup>+</sup> CD4 T-cells did not change in blood or  
725 cerebrospinal fluid. To expand on these observations, other T-cell markers (TIGIT, CD244, and  
726 CD226) were added to the flow cytometry panel and performed on a subset of participants.  
727 CD226<sup>+</sup> CD8 T-cells were decreased in blood (Figure 7D) of PI-ME/CFS participants, with no  
728 change in expression of CD244 or TIGIT (Data 15B and 15D).

729

730 When the group differences in CD8<sup>+</sup> T-cells were assessed after stratification by sex, male PI-  
731 ME/CFS participants had increased CXCR5 expression on CD8<sup>+</sup> T-cells in cerebrospinal fluid  
732 (Figure 7E). Female PI-ME/CFS participants were noted to have increased CD8<sup>+</sup> naïve T-cells in  
733 blood (Figure 7F).

734

#### 735 **Sex-based Differences in Gene Profiles of Peripheral Blood Mononuclear Cells**

736 Peripheral blood mononuclear cell gene expression profiles are different in PI-ME/CFS  
737 compared to HV participants, but only when stratified by sex.

738

739 Gene expression of peripheral blood mononuclear cells (PBMC) was profiled in HV and PI-  
740 ME/CFS. Analysis of PBMC gene expression for all participants by principal component analysis  
741 (PCA) revealed no outliers (Figure 8A). 614 differentially expressed (DE) genes clustered the  
742 samples based on the disease status. However, exploration of PCA plot showed that samples  
743 clustered based on their sex (Figure 8B). Assessment of interaction between sex and disease

744 status were not significant. This suggested sex as a potential confounder impacting gene  
745 expression. Hence DE analysis in male and female cohorts were performed which identified  
746 distinct subset of DE genes, with only 34 (<5%) genes overlapping between the cohorts (Figure  
747 8C, Data S16A-B). Further, PCA of DE genes in each sex cohort clustered the samples into  
748 distinct HV and PI-ME/CFS groups (Figures 8D, 8F).

749  
750 887 DE genes in the male HV and PI-ME/CFS cohorts enriched ( $p < 0.05$ ) in ubiquitin, IL-10, T-cell,  
751 and NF- $\kappa$ B pathways (Figures 8H-I). A subset of DE genes was part of the STAT4-TLR9 protein-  
752 protein interactome and were upregulated in male PI-ME/CFS participants (Figure S14A). 849  
753 DE genes identified in the female HV and PI-ME/CFS cohorts, primarily enriched in B-cell  
754 proliferation processes (Figures 8J-K), and a subset of DE genes identified in the B-cell  
755 interactome were upregulated in female PI-ME/CFS participants (Figure S14B). Additionally, DE  
756 genes were also enriched in cytokine and lymphocyte proliferation processes. These data are  
757 consistent with the expansion of naïve B-cells observed in PI-ME/CFS participants by flow  
758 cytometry.

759

#### 760 **Sex-based Differences in Proteomics of Serum and Cerebrospinal Fluid**

761 Proteomics did not distinguish PI-ME/CFS from HV participants but did suggest differences exist  
762 after stratification by sex. 1317 aptamers were used for detection of various proteins in serum  
763 and cerebrospinal fluid. PCA analysis of aptamers measured in serum and cerebrospinal fluid  
764 did not identify outliers. Univariate analysis of the aptamer datasets did not identify any FDR-  
765 corrected statistically significant differential features between PI-ME/CFS and HV participants  
766 (Data S17A-B). Within each sex separately, exploratory multivariate analyses suggested a subset  
767 of aptamers were predictive of PI-ME/CFS status which are reported for potential validation  
768 (Figures S15A-D; Figures S16A-D; Data S17C-F).

769

#### 770 **Sex-based differences in Gene Expression were Validated in other Data Sets**

771 Sex stratification was observed to impact the ability to distinguish ME/CFS from HV participants  
772 in two independent publicly deposited datasets:

773

774 To understand if this observation of sex confounding was generalizable to other ME/CFS  
775 populations, publicly deposited ME/CFS datasets with RNASeq data were identified and  
776 analyzed. One study, NCBI GEO GSE130353, contained RNA sequencing generated from  
777 monocytes on HV and ME/CFS male and female participants. Sex was inferred using XIST gene  
778 expression<sup>14</sup>. This data set had nine males and 11 females (HV 10 and ME/CFS 10) of which  
779 three were excluded from analysis due to low gene assignment. Groupwise, 315 DE genes were  
780 observed in ME/CFS and HV groups (PCA shown in Figure S17A). Concordant with the PBMC  
781 gene expression profile, PC3 and PC4 clustered samples into groups that corresponded to the  
782 sex of the participants (Figure S17B). 638 DE genes were identified from the ME/CFS and HV  
783 comparison in the male cohort (PCA shown in Figure S17C) and 420 DE genes in the female  
784 cohort (PCA shown in Figure S17D). Of these, only 23 genes were differentially expressed in  
785 both male and female ME/CFS participants when compared to HVs (Figure S17E).

786

787 To further investigate whether the perturbations in the IL10, T cell and lymphocyte processes  
788 identified in the PBMC gene expression profiling could be observed in male ME/CFS participants  
789 in external studies, the methylation of CD3+ T cells from the dataset GSE156792 was assayed in  
790 sex-separated cohorts. First, the sex of the samples in this study were inferred based on their Y  
791 chromosome coverage. Second, differentially methylated positions (DMPs) were identified in  
792 each of the cohort, which were annotated to the genomic loci. The PCA computed using the  
793 methylation fractions of the DMPs in the male cohort distinctly separated the HV from ME/CFS  
794 participants. 138 genes with DMPs overlapped with the DE genes from the PBMC HV versus PI-  
795 ME/CFS comparison. Notably, pathway enrichment analysis of genes with DMPs nominally  
796 enriched in IL10 cytokine and NF-kB related processes, which is concordant with the pathway  
797 enrichment results from the male group PBMC analysis (Figures S17F-G). The DMPs identified in  
798 the female cohort, on the other hand, moderately clustered the samples in HV and PI-ME/CFS  
799 groups. However, pathway enrichment analysis of genes with DMPs in the female cohort  
800 enriched in T cell proliferation and differentiation processes (Figures S17H-I). Consistent with  
801 the DMP signature in the external dataset, the flow cytometric analysis of immune cells  
802 population in this study's female cohort identified increased naïve CD8+ T cells, and decreased  
803 CD225+ T cells in PI-ME/CFS participants. Since the methylation signature was assayed in the  
804 CD3+ T cells, further analysis of the B cell subpopulation will be required to test their role in PI-  
805 ME/CFS pathology in female patients.

806

#### 807 **Natural Killer (NK) Cell function was Normal**

808 No difference in Natural Killer cell function was observed between PI-ME/CFS and HV groups.  
809 No group differences were noted in NK lytic units ( $5.0 \pm 2.8$  versus  $4.4 \pm 3.3$ ,  $p=0.58$ ) or  
810 CD16/CD56 ratio ( $10.1 \pm 3.0$  versus  $11.0 \pm 5.0$ ,  $p=0.53$ ).

811

#### 812 **Cellular Senescence was not seen in PI-ME/CFS**

813 No difference in cellular senescence was observed between PI-ME/CFS and HV groups. Growth  
814 differentiation factor-15 (GDF-15) level was measured as a marker of senescence in plasma and  
815 no difference was found between groups ( $101.8 \pm 36.4$  versus  $97.6 \pm 34.6$  pg/mL,  $p = 0.84$ ).

816

#### 817 **Detailed Autoantibody Testing was Unrevealing in PI-ME/CFS**

818 No consistent pattern of autoimmunity was observed in PI-ME/CFS. Autoantibodies against  
819 several other known or potential autoantigen targets were measured by LIPS as coded samples  
820 from the participants. From testing, occasional rare low-level seropositive autoantibodies  
821 against the target proteins were detected in both groups. For example, one HV and one PI-  
822 ME/CFS participant had antibodies to tyrosine hydroxylase and one HV had antibodies to  
823 Gad65. However, statistical analysis of the seropositivity by Fisher's exact testing with  
824 contingency tables revealed no significant differences in seroprevalence between the two  
825 groups.

826

#### 827 **Transposable Elements and Endogenous Retroviruses were Not Activated in PI-ME/CFS**

828 The PBMC RNAseq data was used to assess the expression levels of transposable elements (TE),  
829 which included the human endogenous retroviruses (HERVs) derived from exogenous retrovirus  
830 infection in HV and PI-ME/CFS samples. Differential expression analysis did not identify HERVs

831 or other autonomous (Long Interspersed Elements (LINEs)) or non-autonomous (Short  
832 Interspersed Elements (SINEs)) TEs to be differentially expressed between HV and PI-ME/CFS  
833 (Data S18).

834

### 835 **Sex-based Differences in Gene Expression Patterns in Muscle**

836 Muscle cell gene expression profiles are different in PI-ME/CFS compared to HV participants,  
837 but only when stratified by sex. RNA Sequencing was performed on muscle samples collected  
838 from the vastus lateralis muscle. PCA analysis of muscle gene expression did not identify any  
839 outliers (Figure 9A, Data S19A). The PCA identified a PC that clustered the samples based on sex  
840 (Figure 9B, Data S19B-C). Only 15 DE genes were common in male and female cohorts (Figure  
841 9C), consistent with prior observations. In the male cohorts, PCA of the 593 DE genes robustly  
842 clustered samples based on the disease status (Figures 9D-E). Genes upregulated in the PI-  
843 ME/CFS males were enriched in gene expression and mRNA processes (Figure 9H) and the  
844 downregulated genes were enriched in hexose metabolism and mitochondrial processes (Figure  
845 9I). Several upregulated genes involved in fatty acid beta-oxidation were noted to be part of a  
846 protein-protein interactome (Figure S18A). In the female cohorts, PCA of the 328 DE genes  
847 showed distinct clusters of HV and PI-ME/CFS samples (Figures 9F-G). DE Genes upregulated in  
848 the PI-ME/CFS females enriched in growth hormone receptor signaling and ubiquitin  
849 transferase function (Figure 9J). Downregulated genes were involved in fatty acid oxidation and  
850 mitochondrial processes (Figure 9K). A subset of these downregulated fatty acid oxidation  
851 genes was highly inter-connected (Figure S18B).

852

### 853 **Sex-based Differences in Lipid Profiles**

854 Lipidomic profiles are different in PI-ME/CFS compared to HV participants, but only when  
855 stratified by sex. Univariate analysis of the lipidomic data did not identify statistically significant  
856 differentially expressed lipids between HV and PI-ME/CFS groups (Data S20). Multivariate  
857 analysis in all participants as well as in male and female cohorts separately identified several  
858 lipid molecules as important variables in prediction (Figures S19A-C). Consistent with the gene  
859 expression analysis, sex differences were observed here too. In the male cohorts, greater than  
860 50 variables were identified as important in predicting the cases and controls. Triacyl-glycerol  
861 (TAG) species with different carbon lengths were increased in PI-ME/CFS participants (Figure  
862 S19B). In the female cohort, a smaller subset of lipid species (<20) classified the group status.  
863 TAG species were again identified among the top variables but were decreased in PI-ME/CFS  
864 females (Figure S19C). The sex specific lipid signatures found in this study are consistent with a  
865 prior lipidomic analysis<sup>15</sup>.

866

### 867 **Gut Microbiome was Different in PI-ME/CFS**

868 The constitution of the gut microbiome in PI-ME/CFS participants is less diverse and dissimilar  
869 from that of HV participants without any discernible difference in metabolites.  
870 Stool samples were collected from PI-ME/CFS and HV participants for microbial metagenomic  
871 analysis. For the HVs that were sampled, the primary residences were mostly in Maryland and  
872 Virginia (76% of HV group) with two individuals from South Carolina and two from Utah. For the  
873 PI-ME/CFS participants sampled, the primary residences were diverse, representing twelve  
874 different US states and Canada.

875  
876 Alpha diversity differences (measured by the number of present taxa) were observed between  
877 groups, with HV having a greater number of taxa than the PI-ME/CFS participants ( $p=0.002$ ;  
878 Figure S20A). There was no significant difference observed by the Inverse Simpson Index ( $p=$   
879  $0.8$ ; Figure S20B) between the two groups. When alpha diversity was assessed within sex, the  
880 HV males had a higher number of taxa than the PI-ME/CFS males ( $p=.008$ ). This difference was  
881 not observed within the females ( $p=0.7$ ). Beta diversity, as measured by Bray-Curtis  
882 dissimilarity, demonstrated significant differences in microbial community composition  
883 between the groups ( $p<0.008$ ; Figure S20C). This finding remained when beta diversity was  
884 assessed within sex for the males ( $p= 0.04$ ), but not within the females ( $p= 0.3$ ). When  
885 analyzed to determine which taxa were responsible for differences in diversity, 22 species were  
886 significantly higher and 26 species were significantly lower in the PI-ME/CFS participants (Figure  
887 S20D).

888

### 889 **Stool Metabolites were Normal in PI-ME/CFS**

890 A total of 34 metabolites were identified within the stool samples for the HV and PI-ME/CFS  
891 participants using nuclear magnetic resonance spectroscopy (Data S21). Untargeted stool  
892 metabolomics did not show any significant differences between the HV and PI-ME/CFS  
893 participants.

894

### 895 **Clinical Course of PI-ME/CFS revealed Spontaneous Improvement in Some**

896 Some PI-ME/CFS participants had clinically notable improvements over time. All participants  
897 were contacted between 11/2021 and 7/2022 to inquire about changes in their clinical  
898 condition. One PI-ME/CFS and one healthy participant were unable to be contacted. Three PI-  
899 ME/CFS participants reported full recovery without being able to attribute it to a specific  
900 intervention and one attributed full recovery to being infected with SARS-CoV-2. All other PI-  
901 ME/CFS participants reported being better at accommodating their illness but remained  
902 unchanged in their level of disability. One PI-ME/CFS participant reported having an in-situ  
903 breast cancer that was treated with excision and radiation therapy. No other new medical  
904 diagnoses were reported by the PI-ME/CFS participants. One healthy volunteer reported  
905 developing post-Lyme disease and chronic fatigue symptoms, one reported having low grade  
906 breast cancer treated with excision and radiation therapy and a single episode of  
907 nephrolithiasis, and one reported developing finger psoriasis that resolved with topical therapy.  
908 No other new medical diagnoses were reported by the HVs.

909

### 910 **REFERENCES:**

911

- 912 1 Bakkers, M. *et al.* Intraepidermal nerve fiber density and its application in sarcoidosis.  
913 *Neurology* **73**, 1142-1148 (2009). <https://doi.org:10.1212/WNL.0b013e3181bacf05>
- 914 2 Freeman, R. *et al.* Consensus statement on the definition of orthostatic hypotension,  
915 neurally mediated syncope and the postural tachycardia syndrome. *Clin Auton Res* **21**,  
916 69-72 (2011). <https://doi.org:10.1007/s10286-011-0119-5>

- 917 3 Lawrie, S. M., MacHale, S. M., Power, M. J. & Goodwin, G. M. Is the chronic fatigue  
918 syndrome best understood as a primary disturbance of the sense of effort? *Psychol Med*  
919 **27**, 995-999 (1997). <https://doi.org:10.1017/s0033291797005370>
- 920 4 Metzger, F. A. & Denney, D. R. Perception of cognitive performance in patients with  
921 chronic fatigue syndrome. *Ann Behav Med* **24**, 106-112 (2002).  
922 [https://doi.org:10.1207/S15324796ABM2402\\_07](https://doi.org:10.1207/S15324796ABM2402_07)
- 923 5 Barhorst, E. E. *et al.* Elevated Perceived Exertion in People with Myalgic  
924 Encephalomyelitis/Chronic Fatigue Syndrome and Fibromyalgia: A Meta-analysis. *Med*  
925 *Sci Sports Exerc* **52**, 2615-2627 (2020). <https://doi.org:10.1249/MSS.0000000000002421>
- 926 6 Cooper, J. A. *et al.* Effortful goal-directed behavior in schizophrenia: Computational  
927 subtypes and associations with cognition. *J Abnorm Psychol* **128**, 710-722 (2019).  
928 <https://doi.org:10.1037/abn0000443>
- 929 7 Dimitrova, N. A., Hogrel, J. Y., Arabadzhiev, T. I. & Dimitrov, G. V. Estimate of M-wave  
930 changes in human biceps brachii during continuous stimulation. *J Electromyogr Kinesiol*  
931 **15**, 341-348 (2005). <https://doi.org:10.1016/j.jelekin.2005.01.005>
- 932 8 Arabadzhiev, T. I., Dimitrov, G. V. & Dimitrova, N. A. Simulation analysis of the ability to  
933 estimate motor unit propagation velocity non-invasively by different two-channel  
934 methods and types of multi-electrodes. *J Electromyogr Kinesiol* **13**, 403-415 (2003).  
935 [https://doi.org:10.1016/s1050-6411\(03\)00036-1](https://doi.org:10.1016/s1050-6411(03)00036-1)
- 936 9 Samii, A., Wassermann, E. M. & Hallett, M. Post-exercise depression of motor evoked  
937 potentials as a function of exercise duration. *Electroencephalogr Clin Neurophysiol* **105**,  
938 352-356 (1997). [https://doi.org:10.1016/s0924-980x\(97\)00033-7](https://doi.org:10.1016/s0924-980x(97)00033-7)
- 939 10 Samii, A. *et al.* Decreased postexercise facilitation of motor evoked potentials in patients  
940 with chronic fatigue syndrome or depression. *Neurology* **47**, 1410-1414 (1996).  
941 <https://doi.org:10.1212/wnl.47.6.1410>
- 942 11 Hansen, J. E., Sue, D. Y. & Wasserman, K. Predicted values for clinical exercise testing.  
943 *Am Rev Respir Dis* **129**, S49-55 (1984). <https://doi.org:10.1164/arrd.1984.129.2P2.S49>
- 944 12 Wasserman K, S. W., Sun XG, Sue DY, Hansen JE, Whipp BJ, Sietsma KE. *Principals of*  
945 *Exercise Testing and Interpretation*. 5th edn, (Lippincott, Williams & Wilkins, 2011).
- 946 13 Pontzer, H. *et al.* Daily energy expenditure through the human life course. *Science* **373**,  
947 808-812 (2021). <https://doi.org:10.1126/science.abe5017>
- 948 14 van den Berge, M. & Sijen, T. A male and female RNA marker to infer sex in forensic  
949 analysis. *Forensic Sci Int Genet* **26**, 70-76 (2017).  
950 <https://doi.org:10.1016/j.fsigen.2016.10.018>
- 951 15 Nkiliza, A. *et al.* Sex-specific plasma lipid profiles of ME/CFS patients and their  
952 association with pain, fatigue, and cognitive symptoms. *J Transl Med* **19**, 370 (2021).  
953 <https://doi.org:10.1186/s12967-021-03035-6>  
954
